# Supplementary material for: Macroevolutionary Dynamics and Historical Biogeography of Primate Diversification Inferred from a Species Supermatrix
Source: PLoS One. 2012 Nov 16;7(11):e49521. doi: 10.1371/journal.pone.0049521 (PMC3500307; doi:10.1371/journal.pone.0049521)
Supplement: Table S1 — Mean, median, and 95% credibility intervals for four different methods. Node numbers are given in Figure S1. (XLS) [file pone.0049521.s003.xls]

## Sheet: Dates in millions of years
1	Constrained		1		MCMCTree			1		MCMCTree			1		MCMCTree			1		MCMCTree			1	Average	Average	Average width of Confidence Intervals	1		MCMCTree			1		MCMCTree			1		mcmctree			1		mcmctree			1	Average	Average
2	Nodes	MCMC Node		Hard	Autocorrelated	Run 1			Hard	Independent Rates	Run 1			Soft	Autocorrelated	Run 1			Soft	Independent Rates	Run 1			Point Median	Estimated Mean	(max-min)		Hard	Autocorrelated	Run 1			Hard	Independent Rates	Run 1			Soft	Autocorrelated	Run 1			Soft	Independent Rates	Run 1			Point Median	Estimated Mean
3		Number		Point	Estimate	Confidence	Interval		Point	Estimate	Confidence	Interval		Point	Estimate	Confidence	Interval		Point	Estimate	Confidence	Interval						Point	Estimate	Confidence	Interval		Point	Estimate	Confidence	Interval		Point	Estimate	Confidence	Interval		Point	Estimate	Confidence	Interval
4				Median	Mean	Minimum	Maximum		Median	Mean	Minimum	Maximum		Median	Mean	Minimum	Maximum		Median	Mean	Minimum	Maximum		for All Nodes	for All Nodes	for All Nodes		Median	Mean	Minimum	Maximum		Median	Mean	Minimum	Maximum		Median	Mean	Minimum	Maximum		Median	Mean	Minimum	Maximum		for All Nodes	for All Nodes
5		t_n373		0.6721	0.6736	0.6458	0.7082		0.8638	0.8667	0.8022	0.9488		0.716	0.7172	0.6596	0.779		0.8447	0.8461	0.7739	0.9272		0.77415	0.7759	0.120425		67.21	67.36	64.58	70.82		86.38	86.67	80.22	94.88		71.6	71.72	65.96	77.9		84.47	84.61	77.39	92.72		77.415	77.59
6		t_n374		0.661	0.6616	0.64	0.6868		0.8002	0.8024	0.7511	0.8678		0.7041	0.704	0.6521	0.7577		0.7937	0.7949	0.7335	0.8646		0.73975	0.740725	0.10005		66.1	66.16	64	68.68		80.02	80.24	75.11	86.78		70.41	70.4	65.21	75.77		79.37	79.49	73.35	86.46		73.975	74.0725
7		t_n375		0.0766	0.0942	0.0362	0.2126		0.1304	0.1294	0.0978	0.1632		0.0764	0.0865	0.0319	0.1941		0.1191	0.1177	0.0882	0.1447		0.100625	0.10695	0.115125		7.66	9.42	3.62	21.26		13.04	12.94	9.78	16.32		7.64	8.65	3.19	19.41		11.91	11.77	8.82	14.47		10.0625	10.695
8	Primates	t_n376		0.627	0.6277	0.6099	0.648		0.7034	0.7051	0.6692	0.7515		0.6666	0.667	0.6193	0.7182		0.7128	0.7136	0.6638	0.7672		0.67745	0.67835	0.080675		62.7	62.77	60.99	64.8		70.34	70.51	66.92	75.15		66.66	66.7	61.93	71.82		71.28	71.36	66.38	76.72		67.745	67.835
9	Strepsirrhini	t_n377		0.5332	0.5329	0.5087	0.554		0.5546	0.5532	0.5388	0.5598		0.5368	0.5339	0.4875	0.5664		0.5521	0.5491	0.5141	0.5722		0.544175	0.542275	0.050825		53.32	53.29	50.87	55.4		55.46	55.32	53.88	55.98		53.68	53.39	48.75	56.64		55.21	54.91	51.41	57.22		54.4175	54.2275
10	Lorisiformes	t_n378		0.3728	0.3735	0.3711	0.3801		0.3733	0.3742	0.3711	0.3824		0.3145	0.3144	0.279	0.351		0.3272	0.3276	0.293	0.3621		0.34695	0.347425	0.04035		37.28	37.35	37.11	38.01		37.33	37.42	37.11	38.24		31.45	31.44	27.9	35.1		32.72	32.76	29.3	36.21		34.695	34.7425
11	Galagidae	t_n379		0.2264	0.2275	0.1776	0.2783		0.2401	0.2483	0.1915	0.3222		0.2029	0.2032	0.162	0.2473		0.2236	0.2279	0.1782	0.292		0.22325	0.226725	0.107625		22.64	22.75	17.76	27.83		24.01	24.83	19.15	32.22		20.29	20.32	16.2	24.73		22.36	22.79	17.82	29.2		22.325	22.6725
12	Galago + Otolemur	t_n380		0.1818	0.1816	0.1482	0.2106		0.1382	0.1392	0.1219	0.1643		0.1532	0.1544	0.1294	0.1835		0.1277	0.1281	0.1118	0.1467		0.150225	0.150825	0.04845		18.18	18.16	14.82	21.06		13.82	13.92	12.19	16.43		15.32	15.44	12.94	18.35		12.77	12.81	11.18	14.67		15.0225	15.0825
13		t_n381		0.1757	0.1749	0.1367	0.2077		0.1357	0.1368	0.1188	0.1622		0.1474	0.1484	0.1219	0.1793		0.1256	0.126	0.1089	0.1451		0.1461	0.146525	0.052		17.57	17.49	13.67	20.77		13.57	13.68	11.88	16.22		14.74	14.84	12.19	17.93		12.56	12.6	10.89	14.51		14.61	14.6525
14		t_n382		0.1543	0.1543	0.1237	0.184		0.1101	0.111	0.0954	0.1308		0.1282	0.1291	0.1075	0.1554		0.1015	0.102	0.087	0.119		0.123525	0.1241	0.0439		15.43	15.43	12.37	18.4		11.01	11.1	9.54	13.08		12.82	12.91	10.75	15.54		10.15	10.2	8.7	11.9		12.3525	12.41
15		t_n383		0.048	0.0502	0.0269	0.0805		0.0269	0.0272	0.0147	0.0462		0.0379	0.0408	0.024	0.0714		0.0206	0.022	0.0118	0.0414		0.03335	0.03505	0.040525		4.8	5.02	2.69	8.05		2.69	2.72	1.47	4.62		3.79	4.08	2.4	7.14		2.06	2.2	1.18	4.14		3.335	3.505
16		t_n384		0.0093	0.0095	0.0055	0.0145		0.0084	0.0086	0.0052	0.0131		0.0077	0.0079	0.0045	0.0122		0.0071	0.0072	0.0044	0.0108		0.008125	0.0083	0.00775		0.93	0.95	0.55	1.45		0.84	0.86	0.52	1.31		0.77	0.79	0.45	1.22		0.71	0.72	0.44	1.08		0.8125	0.83
17		t_n385		0.0076	0.0078	0.0033	0.013		0.0071	0.0073	0.0032	0.0121		0.0063	0.0065	0.0029	0.011		0.0059	0.006	0.0025	0.0097		0.006725	0.0069	0.008475		0.76	0.78	0.33	1.3		0.71	0.73	0.32	1.21		0.63	0.65	0.29	1.1		0.59	0.6	0.25	0.97		0.6725	0.69
18		t_n386		0.1391	0.1382	0.0992	0.1742		0.0865	0.086	0.0573	0.113		0.1147	0.1158	0.092	0.1441		0.0796	0.0789	0.0511	0.1055		0.104975	0.104725	0.0593		13.91	13.82	9.92	17.42		8.65	8.6	5.73	11.3		11.47	11.58	9.2	14.41		7.96	7.89	5.11	10.55		10.4975	10.4725
19		t_n387		0.0863	0.0917	0.0337	0.1478		0.0363	0.0434	0.0173	0.0896		0.076	0.0767	0.0351	0.1188		0.0342	0.0363	0.0134	0.0782		0.0582	0.062025	0.083725		8.63	9.17	3.37	14.78		3.63	4.34	1.73	8.96		7.6	7.67	3.51	11.88		3.42	3.63	1.34	7.82		5.82	6.2025
20		t_n388		0.0226	0.0232	0.0039	0.0467		0.0132	0.0141	0.0029	0.031		0.0182	0.0195	0.0041	0.042		0.0109	0.0115	0.0029	0.0235		0.016225	0.017075	0.03235		2.26	2.32	0.39	4.67		1.32	1.41	0.29	3.1		1.82	1.95	0.41	4.2		1.09	1.15	0.29	2.35		1.6225	1.7075
21		t_n389		0.1031	0.1024	0.0727	0.1384		0.0583	0.0608	0.042	0.0866		0.0808	0.0832	0.0663	0.1148		0.0546	0.057	0.0381	0.085		0.0742	0.07585	0.051425		10.31	10.24	7.27	13.84		5.83	6.08	4.2	8.66		8.08	8.32	6.63	11.48		5.46	5.7	3.81	8.5		7.42	7.585
22		t_n390		0.0979	0.0976	0.0686	0.1336		0.0519	0.0511	0.0318	0.0732		0.0777	0.0798	0.0628	0.1097		0.0463	0.0476	0.0319	0.0739		0.06845	0.069025	0.048825		9.79	9.76	6.86	13.36		5.19	5.11	3.18	7.32		7.77	7.98	6.28	10.97		4.63	4.76	3.19	7.39		6.845	6.9025
23		t_n391		0.0353	0.0371	0.0233	0.0628		0.0292	0.029	0.0199	0.0374		0.0318	0.0321	0.0207	0.0464		0.0275	0.0279	0.0191	0.0388		0.03095	0.031525	0.0256		3.53	3.71	2.33	6.28		2.92	2.9	1.99	3.74		3.18	3.21	2.07	4.64		2.75	2.79	1.91	3.88		3.095	3.1525
24		t_n392		0.0047	0.0068	0.0003	0.0243		0.0024	0.0036	0.0001	0.0136		0.0048	0.0063	0.0003	0.0232		0.002	0.0031	0.0002	0.012		0.003475	0.00495	0.01805		0.47	0.68	0.03	2.43		0.24	0.36	0.01	1.36		0.48	0.63	0.03	2.32		0.2	0.31	0.02	1.2		0.3475	0.495
25	Lorisidae	t_n393		0.3461	0.346	0.3326	0.3581		0.3499	0.3495	0.3339	0.3631		0.2897	0.2899	0.2558	0.3234		0.3054	0.3057	0.2706	0.3409		0.322775	0.322775	0.04815		34.61	34.6	33.26	35.81		34.99	34.95	33.39	36.31		28.97	28.99	25.58	32.34		30.54	30.57	27.06	34.09		32.2775	32.2775
26		t_n394		0.2689	0.2653	0.2118	0.3009		0.1888	0.1873	0.1449	0.2195		0.2005	0.1996	0.1573	0.2405		0.1644	0.1637	0.1277	0.1999		0.20565	0.203975	0.079775		26.89	26.53	21.18	30.09		18.88	18.73	14.49	21.95		20.05	19.96	15.73	24.05		16.44	16.37	12.77	19.99		20.565	20.3975
27	Loris	t_n395		0.0027	0.005	0.0001	0.0245		0.002	0.0031	0.0001	0.0123		0.0036	0.0061	0	0.0256		0.0018	0.003	0.0001	0.0133		0.002525	0.0043	0.01885		0.27	0.5	0.01	2.45		0.2	0.31	0.01	1.23		0.36	0.61	0	2.56		0.18	0.3	0.01	1.33		0.2525	0.43
28	Nycticebus	t_n396		0.0608	0.0612	0.0443	0.0791		0.0539	0.0533	0.042	0.0643		0.0491	0.0492	0.0354	0.0644		0.0469	0.0469	0.0371	0.0578		0.052675	0.05265	0.0267		6.08	6.12	4.43	7.91		5.39	5.33	4.2	6.43		4.91	4.92	3.54	6.44		4.69	4.69	3.71	5.78		5.2675	5.265
29		t_n397		0.0381	0.0394	0.0264	0.0576		0.0244	0.0245	0.0132	0.0351		0.0313	0.0312	0.02	0.0431		0.0197	0.0204	0.0115	0.0336		0.028375	0.028875	0.024575		3.81	3.94	2.64	5.76		2.44	2.45	1.32	3.51		3.13	3.12	2	4.31		1.97	2.04	1.15	3.36		2.8375	2.8875
30		t_n398		0.0053	0.0056	0.0027	0.0105		0.0092	0.0098	0.0034	0.0197		0.0042	0.0045	0.0022	0.0085		0.0082	0.0087	0.003	0.0169		0.006725	0.00715	0.011075		0.53	0.56	0.27	1.05		0.92	0.98	0.34	1.97		0.42	0.45	0.22	0.85		0.82	0.87	0.3	1.69		0.6725	0.715
31		t_n399		0.0035	0.0037	0.0015	0.0071		0.0028	0.0029	0.0004	0.0063		0.0028	0.003	0.0012	0.0055		0.0026	0.0027	0.0005	0.0056		0.002925	0.003075	0.005225		0.35	0.37	0.15	0.71		0.28	0.29	0.04	0.63		0.28	0.3	0.12	0.55		0.26	0.27	0.05	0.56		0.2925	0.3075
32		t_n400		0.2908	0.2886	0.2487	0.3132		0.2024	0.2008	0.1606	0.2329		0.2159	0.216	0.172	0.26		0.1798	0.1785	0.1361	0.212		0.222225	0.220975	0.075175		29.08	28.86	24.87	31.32		20.24	20.08	16.06	23.29		21.59	21.6	17.2	26		17.98	17.85	13.61	21.2		22.2225	22.0975
33	Arctocebus	t_n401		0.007	0.0094	0.0004	0.0321		0.0042	0.0063	0.0004	0.0241		0.0089	0.0115	0.0008	0.0351		0.0046	0.0059	0.0004	0.0185		0.006175	0.008275	0.02695		0.7	0.94	0.04	3.21		0.42	0.63	0.04	2.41		0.89	1.15	0.08	3.51		0.46	0.59	0.04	1.85		0.6175	0.8275
34	Lemuriformes + Chiromyiformes	t_n402		0.505	0.5049	0.4795	0.5278		0.4989	0.498	0.4702	0.5207		0.5059	0.5034	0.4578	0.5378		0.4934	0.4919	0.4516	0.5235		0.5008	0.49955	0.062675		50.5	50.49	47.95	52.78		49.89	49.8	47.02	52.07		50.59	50.34	45.78	53.78		49.34	49.19	45.16	52.35		50.08	49.955
35	Lemuriformes	t_n403		0.3345	0.3349	0.3056	0.3664		0.3263	0.3264	0.2997	0.3538		0.3117	0.3114	0.2787	0.3448		0.2982	0.2979	0.2673	0.3265		0.317675	0.31765	0.06005		33.45	33.49	30.56	36.64		32.63	32.64	29.97	35.38		31.17	31.14	27.87	34.48		29.82	29.79	26.73	32.65		31.7675	31.765
36	Lemuridae	t_n404		0.2272	0.2278	0.2003	0.2597		0.2019	0.2008	0.1698	0.2275		0.2156	0.2163	0.1888	0.2456		0.1855	0.1844	0.1528	0.2127		0.20755	0.207325	0.05845		22.72	22.78	20.03	25.97		20.19	20.08	16.98	22.75		21.56	21.63	18.88	24.56		18.55	18.44	15.28	21.27		20.755	20.7325
37	Varecia	t_n405		0.0082	0.0087	0.0038	0.0168		0.0063	0.0064	0.0034	0.0104		0.007	0.0073	0.0033	0.0135		0.0055	0.0057	0.0028	0.0091		0.00675	0.007025	0.009125		0.82	0.87	0.38	1.68		0.63	0.64	0.34	1.04		0.7	0.73	0.33	1.35		0.55	0.57	0.28	0.91		0.675	0.7025
38		t_n406		0.1972	0.1974	0.1717	0.227		0.1744	0.1737	0.143	0.2004		0.1853	0.1859	0.1607	0.2129		0.1609	0.1599	0.13	0.1879		0.17945	0.179225	0.0557		19.72	19.74	17.17	22.7		17.44	17.37	14.3	20.04		18.53	18.59	16.07	21.29		16.09	15.99	13	18.79		17.945	17.9225
39		t_n407		0.0869	0.0906	0.0716	0.1198		0.0613	0.0629	0.0522	0.08		0.0855	0.0869	0.0687	0.1127		0.0557	0.0565	0.0456	0.071		0.07235	0.074225	0.03635		8.69	9.06	7.16	11.98		6.13	6.29	5.22	8		8.55	8.69	6.87	11.27		5.57	5.65	4.56	7.1		7.235	7.4225
40		t_n408		0.0797	0.0834	0.0648	0.1112		0.0536	0.0535	0.0408	0.0697		0.0782	0.0798	0.0623	0.1052		0.0471	0.0474	0.0351	0.0626		0.06465	0.066025	0.036425		7.97	8.34	6.48	11.12		5.36	5.35	4.08	6.97		7.82	7.98	6.23	10.52		4.71	4.74	3.51	6.26		6.465	6.6025
41	Hapalemur	t_n409		0.0512	0.0532	0.0328	0.081		0.0302	0.0301	0.0181	0.0447		0.053	0.0536	0.034	0.079		0.025	0.0265	0.0154	0.0419		0.03985	0.04085	0.036575		5.12	5.32	3.28	8.1		3.02	3.01	1.81	4.47		5.3	5.36	3.4	7.9		2.5	2.65	1.54	4.19		3.985	4.085
42		t_n410		0.0083	0.0084	0.0051	0.0123		0.0076	0.0077	0.0049	0.0113		0.0073	0.0074	0.0043	0.0112		0.0068	0.0068	0.0041	0.0102		0.0075	0.007575	0.00665		0.83	0.84	0.51	1.23		0.76	0.77	0.49	1.13		0.73	0.74	0.43	1.12		0.68	0.68	0.41	1.02		0.75	0.7575
43		t_n411		0.0025	0.0027	0.0008	0.0054		0.0034	0.0036	0.0015	0.0069		0.003	0.0031	0.0013	0.0055		0.0034	0.0036	0.0012	0.0066		0.003075	0.00325	0.0049		0.25	0.27	0.08	0.54		0.34	0.36	0.15	0.69		0.3	0.31	0.13	0.55		0.34	0.36	0.12	0.66		0.3075	0.325
44		t_n412		0.001	0.0014	0	0.0042		0.0014	0.0016	0.0001	0.0044		0.002	0.0021	0.0003	0.0044		0.0017	0.002	0.0004	0.0052		0.001525	0.001775	0.00435		0.1	0.14	0	0.42		0.14	0.16	0.01	0.44		0.2	0.21	0.03	0.44		0.17	0.2	0.04	0.52		0.1525	0.1775
45	Eulemur	t_n413		0.0743	0.0739	0.0532	0.0947		0.0547	0.0545	0.0459	0.063		0.0699	0.0694	0.049	0.0894		0.0503	0.0505	0.0421	0.0601		0.0623	0.062075	0.02925		7.43	7.39	5.32	9.47		5.47	5.45	4.59	6.3		6.99	6.94	4.9	8.94		5.03	5.05	4.21	6.01		6.23	6.2075
46		t_n414		0.0654	0.0652	0.0471	0.0822		0.0371	0.0373	0.0327	0.0446		0.0611	0.0606	0.043	0.0773		0.0365	0.0365	0.0299	0.043		0.050025	0.0499	0.0236		6.54	6.52	4.71	8.22		3.71	3.73	3.27	4.46		6.11	6.06	4.3	7.73		3.65	3.65	2.99	4.3		5.0025	4.99
47		t_n415		0.0566	0.0564	0.0379	0.0736		0.0321	0.0322	0.0273	0.0386		0.0527	0.0523	0.0348	0.0689		0.0315	0.0315	0.0252	0.0378		0.043225	0.0431	0.023425		5.66	5.64	3.79	7.36		3.21	3.22	2.73	3.86		5.27	5.23	3.48	6.89		3.15	3.15	2.52	3.78		4.3225	4.31
48		t_n416		0.0282	0.0282	0.02	0.0364		0.0175	0.0176	0.0137	0.0222		0.0264	0.0263	0.0181	0.0349		0.0165	0.0166	0.0127	0.021		0.02215	0.022175	0.0125		2.82	2.82	2	3.64		1.75	1.76	1.37	2.22		2.64	2.63	1.81	3.49		1.65	1.66	1.27	2.1		2.215	2.2175
49		t_n417		0.0206	0.0206	0.0128	0.0289		0.0131	0.0131	0.0079	0.0185		0.0192	0.0193	0.0117	0.028		0.0123	0.0123	0.0072	0.0178		0.0163	0.016325	0.0134		2.06	2.06	1.28	2.89		1.31	1.31	0.79	1.85		1.92	1.93	1.17	2.8		1.23	1.23	0.72	1.78		1.63	1.6325
50		t_n418		0.0134	0.0135	0.0084	0.0194		0.0088	0.0089	0.0048	0.0139		0.0127	0.0128	0.0075	0.0186		0.0083	0.0084	0.0047	0.0127		0.0108	0.0109	0.0098		1.34	1.35	0.84	1.94		0.88	0.89	0.48	1.39		1.27	1.28	0.75	1.86		0.83	0.84	0.47	1.27		1.08	1.09
51		t_n419		0.0115	0.0116	0.0066	0.0174		0.0062	0.0063	0.0029	0.0108		0.0107	0.0109	0.0061	0.0166		0.0055	0.0056	0.0025	0.0095		0.008475	0.0086	0.00905		1.15	1.16	0.66	1.74		0.62	0.63	0.29	1.08		1.07	1.09	0.61	1.66		0.55	0.56	0.25	0.95		0.8475	0.86
52		t_n420		0.0261	0.0261	0.0182	0.0339		0.015	0.0151	0.0111	0.0196		0.0242	0.0242	0.0166	0.0325		0.014	0.014	0.0101	0.0181		0.019825	0.01985	0.012025		2.61	2.61	1.82	3.39		1.5	1.51	1.11	1.96		2.42	2.42	1.66	3.25		1.4	1.4	1.01	1.81		1.9825	1.985
53		t_n421		0.0117	0.012	0.0063	0.0188		0.0059	0.0062	0.0023	0.0117		0.0109	0.0111	0.0057	0.0181		0.0054	0.0056	0.0018	0.0109		0.008475	0.008725	0.01085		1.17	1.2	0.63	1.88		0.59	0.62	0.23	1.17		1.09	1.11	0.57	1.81		0.54	0.56	0.18	1.09		0.8475	0.8725
54		t_n422		0.058	0.0578	0.0389	0.075		0.0331	0.0333	0.0286	0.0407		0.0544	0.0538	0.0358	0.0708		0.033	0.033	0.0263	0.0397		0.044625	0.044475	0.02415		5.8	5.78	3.89	7.5		3.31	3.33	2.86	4.07		5.44	5.38	3.58	7.08		3.3	3.3	2.63	3.97		4.4625	4.4475
55		t_n423		0.0111	0.0113	0.0057	0.0185		0.0062	0.0064	0.0032	0.0104		0.0101	0.0103	0.0052	0.0167		0.0057	0.0058	0.0027	0.0094		0.008275	0.00845	0.00955		1.11	1.13	0.57	1.85		0.62	0.64	0.32	1.04		1.01	1.03	0.52	1.67		0.57	0.58	0.27	0.94		0.8275	0.845
56	Indriidae + Cheirogaleidae + Lepilemuridae	t_n424		0.3236	0.324	0.2953	0.3545		0.3136	0.3136	0.2868	0.341		0.3021	0.3019	0.2699	0.3337		0.2864	0.2864	0.2562	0.3145		0.306425	0.306475	0.058875		32.36	32.4	29.53	35.45		31.36	31.36	28.68	34.1		30.21	30.19	26.99	33.37		28.64	28.64	25.62	31.45		30.6425	30.6475
57		t_n425		0.2941	0.2947	0.2645	0.3273		0.2814	0.2816	0.2557	0.3099		0.271	0.271	0.2389	0.3032		0.258	0.2577	0.2291	0.2843		0.276125	0.27625	0.059125		29.41	29.47	26.45	32.73		28.14	28.16	25.57	30.99		27.1	27.1	23.89	30.32		25.8	25.77	22.91	28.43		27.6125	27.625
58		t_n426		0.2624	0.254	0.1747	0.3164		0.2272	0.2267	0.1296	0.2951		0.1978	0.2025	0.1435	0.284		0.2108	0.2094	0.1257	0.2668		0.22455	0.22315	0.1472		26.24	25.4	17.47	31.64		22.72	22.67	12.96	29.51		19.78	20.25	14.35	28.4		21.08	20.94	12.57	26.68		22.455	22.315
59	Lepilemuridae	t_n427		0.1017	0.1015	0.0768	0.1271		0.0818	0.082	0.0704	0.0955		0.0823	0.084	0.0683	0.1076		0.0727	0.0729	0.0615	0.0856		0.084625	0.0851	0.0347		10.17	10.15	7.68	12.71		8.18	8.2	7.04	9.55		8.23	8.4	6.83	10.76		7.27	7.29	6.15	8.56		8.4625	8.51
60		t_n428		0.0667	0.0661	0.0505	0.0798		0.0557	0.0558	0.0484	0.0639		0.0565	0.057	0.0451	0.072		0.0499	0.05	0.0425	0.0586		0.0572	0.057225	0.02195		6.67	6.61	5.05	7.98		5.57	5.58	4.84	6.39		5.65	5.7	4.51	7.2		4.99	5	4.25	5.86		5.72	5.7225
61		t_n429		0.0516	0.0514	0.0373	0.0657		0.045	0.0442	0.0315	0.0561		0.0427	0.0435	0.0332	0.0579		0.0397	0.0395	0.028	0.0502		0.04475	0.04465	0.024975		5.16	5.14	3.73	6.57		4.5	4.42	3.15	5.61		4.27	4.35	3.32	5.79		3.97	3.95	2.8	5.02		4.475	4.465
62		t_n430		0.0329	0.0328	0.0233	0.0427		0.0289	0.0286	0.0189	0.0381		0.0282	0.0285	0.0203	0.0389		0.0233	0.0239	0.016	0.035		0.028325	0.02845	0.01905		3.29	3.28	2.33	4.27		2.89	2.86	1.89	3.81		2.82	2.85	2.03	3.89		2.33	2.39	1.6	3.5		2.8325	2.845
63		t_n431		0.024	0.0242	0.0169	0.0326		0.0215	0.0217	0.0127	0.031		0.0206	0.0209	0.0145	0.0295		0.0176	0.0179	0.0108	0.0268		0.020925	0.021175	0.01625		2.4	2.42	1.69	3.26		2.15	2.17	1.27	3.1		2.06	2.09	1.45	2.95		1.76	1.79	1.08	2.68		2.0925	2.1175
64		t_n432		0.015	0.0153	0.0094	0.0231		0.0115	0.012	0.0051	0.0215		0.0132	0.0135	0.0077	0.021		0.0098	0.0101	0.0042	0.0171		0.012375	0.012725	0.014075		1.5	1.53	0.94	2.31		1.15	1.2	0.51	2.15		1.32	1.35	0.77	2.1		0.98	1.01	0.42	1.71		1.2375	1.2725
65		t_n433		0.0084	0.009	0.0032	0.018		0.0076	0.0084	0.0024	0.0195		0.007	0.0075	0.0024	0.0155		0.0069	0.0076	0.0024	0.0168		0.007475	0.008125	0.01485		0.84	0.9	0.32	1.8		0.76	0.84	0.24	1.95		0.7	0.75	0.24	1.55		0.69	0.76	0.24	1.68		0.7475	0.8125
66		t_n434		0.049	0.0489	0.0357	0.0615		0.0349	0.0367	0.0276	0.0496		0.0425	0.0431	0.0326	0.0568		0.0344	0.0344	0.0236	0.0462		0.0402	0.040775	0.02365		4.9	4.89	3.57	6.15		3.49	3.67	2.76	4.96		4.25	4.31	3.26	5.68		3.44	3.44	2.36	4.62		4.02	4.0775
67		t_n435		0.0352	0.0352	0.0247	0.0465		0.0242	0.0245	0.0154	0.0347		0.0315	0.0317	0.0227	0.0428		0.0208	0.0215	0.0132	0.034		0.027925	0.028225	0.0205		3.52	3.52	2.47	4.65		2.42	2.45	1.54	3.47		3.15	3.17	2.27	4.28		2.08	2.15	1.32	3.4		2.7925	2.8225
68		t_n436		0.0129	0.0132	0.0079	0.0195		0.0114	0.0118	0.0056	0.0209		0.0116	0.0118	0.0071	0.0179		0.0103	0.0106	0.0054	0.0182		0.01155	0.01185	0.012625		1.29	1.32	0.79	1.95		1.14	1.18	0.56	2.09		1.16	1.18	0.71	1.79		1.03	1.06	0.54	1.82		1.155	1.185
69		t_n437		0.0099	0.01	0.0056	0.015		0.0078	0.0083	0.0033	0.016		0.009	0.0092	0.0054	0.0142		0.007	0.0074	0.0031	0.0138		0.008425	0.008725	0.0104		0.99	1	0.56	1.5		0.78	0.83	0.33	1.6		0.9	0.92	0.54	1.42		0.7	0.74	0.31	1.38		0.8425	0.8725
70		t_n438		0.0278	0.0278	0.0199	0.0359		0.0207	0.0208	0.016	0.0257		0.0247	0.025	0.018	0.0335		0.0186	0.0186	0.0145	0.0231		0.02295	0.02305	0.01245		2.78	2.78	1.99	3.59		2.07	2.08	1.6	2.57		2.47	2.5	1.8	3.35		1.86	1.86	1.45	2.31		2.295	2.305
71		t_n439		0.0185	0.0186	0.013	0.025		0.0169	0.017	0.0129	0.0214		0.0161	0.0163	0.0113	0.0225		0.0152	0.0153	0.0116	0.0193		0.016675	0.0168	0.00985		1.85	1.86	1.3	2.5		1.69	1.7	1.29	2.14		1.61	1.63	1.13	2.25		1.52	1.53	1.16	1.93		1.6675	1.68
72		t_n440		0.0085	0.0087	0.0052	0.013		0.0095	0.0098	0.0047	0.0161		0.0078	0.0082	0.0046	0.0135		0.0091	0.0091	0.0046	0.0144		0.008725	0.00895	0.009475		0.85	0.87	0.52	1.3		0.95	0.98	0.47	1.61		0.78	0.82	0.46	1.35		0.91	0.91	0.46	1.44		0.8725	0.895
73		t_n441		0.0077	0.0079	0.0046	0.0121		0.0078	0.0081	0.0035	0.0144		0.0071	0.0074	0.004	0.0126		0.0075	0.0077	0.0034	0.0131		0.007525	0.007775	0.009175		0.77	0.79	0.46	1.21		0.78	0.81	0.35	1.44		0.71	0.74	0.4	1.26		0.75	0.77	0.34	1.31		0.7525	0.7775
74		t_n442		0.0172	0.0173	0.012	0.0235		0.0157	0.0157	0.0116	0.0202		0.015	0.0152	0.0104	0.0211		0.0141	0.0142	0.0104	0.0183		0.0155	0.0156	0.009675		1.72	1.73	1.2	2.35		1.57	1.57	1.16	2.02		1.5	1.52	1.04	2.11		1.41	1.42	1.04	1.83		1.55	1.56
75		t_n443		0.0145	0.0147	0.0098	0.0208		0.0123	0.0124	0.0075	0.0175		0.0127	0.0129	0.0082	0.0188		0.0111	0.0111	0.0062	0.0159		0.01265	0.012775	0.010325		1.45	1.47	0.98	2.08		1.23	1.24	0.75	1.75		1.27	1.29	0.82	1.88		1.11	1.11	0.62	1.59		1.265	1.2775
76		t_n444		0.0087	0.0089	0.0049	0.014		0.0076	0.0078	0.0039	0.013		0.0076	0.0078	0.0045	0.0124		0.0071	0.0072	0.0036	0.0115		0.00775	0.007925	0.0085		0.87	0.89	0.49	1.4		0.76	0.78	0.39	1.3		0.76	0.78	0.45	1.24		0.71	0.72	0.36	1.15		0.775	0.7925
77		t_n445		0.0641	0.0642	0.0476	0.0819		0.0481	0.0472	0.0301	0.0659		0.0549	0.055	0.038	0.073		0.0423	0.0423	0.0269	0.0579		0.05235	0.052175	0.034025		6.41	6.42	4.76	8.19		4.81	4.72	3.01	6.59		5.49	5.5	3.8	7.3		4.23	4.23	2.69	5.79		5.235	5.2175
78		t_n446		0.0392	0.0408	0.0283	0.0583		0.0303	0.0308	0.0199	0.0481		0.034	0.0344	0.0238	0.0483		0.0264	0.0276	0.0167	0.0439		0.032475	0.0334	0.027475		3.92	4.08	2.83	5.83		3.03	3.08	1.99	4.81		3.4	3.44	2.38	4.83		2.64	2.76	1.67	4.39		3.2475	3.34
79		t_n447		0.0271	0.0277	0.0186	0.0389		0.0181	0.0186	0.0104	0.0294		0.0234	0.0238	0.0155	0.0345		0.0159	0.0163	0.0095	0.0255		0.021125	0.0216	0.018575		2.71	2.77	1.86	3.89		1.81	1.86	1.04	2.94		2.34	2.38	1.55	3.45		1.59	1.63	0.95	2.55		2.1125	2.16
80		t_n448		0.015	0.0155	0.0093	0.0241		0.0108	0.0112	0.0054	0.0199		0.0126	0.0129	0.008	0.0197		0.0098	0.0102	0.0048	0.0174		0.01205	0.01245	0.0134		1.5	1.55	0.93	2.41		1.08	1.12	0.54	1.99		1.26	1.29	0.8	1.97		0.98	1.02	0.48	1.74		1.205	1.245
81		t_n449		0.0101	0.0103	0.0049	0.0173		0.0066	0.007	0.0022	0.0144		0.0087	0.009	0.0041	0.0156		0.0058	0.0062	0.0019	0.0126		0.0078	0.008125	0.0117		1.01	1.03	0.49	1.73		0.66	0.7	0.22	1.44		0.87	0.9	0.41	1.56		0.58	0.62	0.19	1.26		0.78	0.8125
82	Cheirogaleidae (w/o Phaner)	t_n450		0.2368	0.2373	0.2098	0.2662		0.215	0.2155	0.1925	0.2397		0.2214	0.2218	0.194	0.2502		0.1994	0.1988	0.1739	0.222		0.21815	0.21835	0.051975		23.68	23.73	20.98	26.62		21.5	21.55	19.25	23.97		22.14	22.18	19.4	25.02		19.94	19.88	17.39	22.2		21.815	21.835
83		t_n451		0.1804	0.181	0.1495	0.2131		0.1434	0.1487	0.121	0.1982		0.1743	0.1746	0.1413	0.2087		0.1344	0.1404	0.1116	0.1901		0.158125	0.161175	0.071675		18.04	18.1	14.95	21.31		14.34	14.87	12.1	19.82		17.43	17.46	14.13	20.87		13.44	14.04	11.16	19.01		15.8125	16.1175
84		t_n452		0.1456	0.1466	0.1238	0.1729		0.127	0.1265	0.1074	0.1452		0.1373	0.1381	0.1158	0.1638		0.1171	0.1166	0.0966	0.1343		0.13175	0.13195	0.04315		14.56	14.66	12.38	17.29		12.7	12.65	10.74	14.52		13.73	13.81	11.58	16.38		11.71	11.66	9.66	13.43		13.175	13.195
85	Mirza	t_n453		0.0067	0.0079	0.0016	0.0213		0.0025	0.0029	0.0006	0.0077		0.0056	0.0066	0.0014	0.0177		0.0021	0.0027	0.0005	0.008		0.004225	0.005025	0.01265		0.67	0.79	0.16	2.13		0.25	0.29	0.06	0.77		0.56	0.66	0.14	1.77		0.21	0.27	0.05	0.8		0.4225	0.5025
86	Microcebus	t_n454		0.0735	0.0735	0.0606	0.0881		0.068	0.0684	0.0544	0.0861		0.0702	0.0705	0.0558	0.0872		0.0638	0.0642	0.0497	0.081		0.068875	0.06915	0.030475		7.35	7.35	6.06	8.81		6.8	6.84	5.44	8.61		7.02	7.05	5.58	8.72		6.38	6.42	4.97	8.1		6.8875	6.915
87		t_n455		0.0517	0.0511	0.0335	0.0674		0.0333	0.035	0.0206	0.0562		0.0463	0.0464	0.0302	0.0649		0.0346	0.0344	0.0189	0.0507		0.041475	0.041725	0.034		5.17	5.11	3.35	6.74		3.33	3.5	2.06	5.62		4.63	4.64	3.02	6.49		3.46	3.44	1.89	5.07		4.1475	4.1725
88		t_n456		0.0588	0.059	0.0487	0.0709		0.0557	0.056	0.0449	0.07		0.0567	0.0569	0.0446	0.0709		0.052	0.0526	0.0412	0.0667		0.0558	0.056125	0.024775		5.88	5.9	4.87	7.09		5.57	5.6	4.49	7		5.67	5.69	4.46	7.09		5.2	5.26	4.12	6.67		5.58	5.6125
89		t_n457		0.0422	0.0431	0.0319	0.0575		0.0349	0.038	0.0229	0.0568		0.0394	0.0405	0.029	0.0564		0.0345	0.0346	0.0177	0.0536		0.03775	0.03905	0.0307		4.22	4.31	3.19	5.75		3.49	3.8	2.29	5.68		3.94	4.05	2.9	5.64		3.45	3.46	1.77	5.36		3.775	3.905
90		t_n458		0.0264	0.0267	0.0139	0.0396		0.0197	0.0202	0.0068	0.0345		0.0251	0.0255	0.0136	0.0396		0.0161	0.0168	0.0058	0.0337		0.021825	0.0223	0.026825		2.64	2.67	1.39	3.96		1.97	2.02	0.68	3.45		2.51	2.55	1.36	3.96		1.61	1.68	0.58	3.37		2.1825	2.23
91		t_n459		0.0323	0.0323	0.0193	0.0463		0.0256	0.0256	0.012	0.0439		0.0305	0.0308	0.0182	0.0451		0.0199	0.0217	0.0101	0.0414		0.027075	0.0276	0.029275		3.23	3.23	1.93	4.63		2.56	2.56	1.2	4.39		3.05	3.08	1.82	4.51		1.99	2.17	1.01	4.14		2.7075	2.76
92		t_n460		0.0073	0.0079	0.0018	0.0172		0.0071	0.0083	0.0018	0.0199		0.0065	0.0072	0.0013	0.0174		0.0061	0.007	0.0015	0.0181		0.00675	0.0076	0.01655		0.73	0.79	0.18	1.72		0.71	0.83	0.18	1.99		0.65	0.72	0.13	1.74		0.61	0.7	0.15	1.81		0.675	0.76
93		t_n461		0.049	0.0492	0.0407	0.0591		0.0469	0.047	0.0358	0.0582		0.0474	0.0476	0.0368	0.0599		0.044	0.0443	0.0339	0.0557		0.046825	0.047025	0.021425		4.9	4.92	4.07	5.91		4.69	4.7	3.58	5.82		4.74	4.76	3.68	5.99		4.4	4.43	3.39	5.57		4.6825	4.7025
94		t_n462		0.0431	0.0434	0.0365	0.052		0.0359	0.0368	0.0317	0.0451		0.042	0.0422	0.0332	0.0526		0.0363	0.0362	0.0264	0.0459		0.039325	0.03965	0.01695		4.31	4.34	3.65	5.2		3.59	3.68	3.17	4.51		4.2	4.22	3.32	5.26		3.63	3.62	2.64	4.59		3.9325	3.965
95		t_n463		0.0378	0.0381	0.032	0.0456		0.0331	0.0331	0.0282	0.0389		0.037	0.0372	0.0292	0.0466		0.0319	0.0321	0.0231	0.0422		0.03495	0.035125	0.0152		3.78	3.81	3.2	4.56		3.31	3.31	2.82	3.89		3.7	3.72	2.92	4.66		3.19	3.21	2.31	4.22		3.495	3.5125
96		t_n464		0.0324	0.0326	0.0265	0.0396		0.0297	0.0296	0.0239	0.0347		0.0318	0.032	0.0247	0.0403		0.0278	0.0283	0.0196	0.0389		0.030425	0.030625	0.0147		3.24	3.26	2.65	3.96		2.97	2.96	2.39	3.47		3.18	3.2	2.47	4.03		2.78	2.83	1.96	3.89		3.0425	3.0625
97		t_n465		0.0269	0.027	0.0207	0.0343		0.0244	0.0241	0.0163	0.0311		0.0262	0.0265	0.0196	0.0349		0.0212	0.0221	0.0138	0.0338		0.024675	0.024925	0.015925		2.69	2.7	2.07	3.43		2.44	2.41	1.63	3.11		2.62	2.65	1.96	3.49		2.12	2.21	1.38	3.38		2.4675	2.4925
98		t_n466		0.011	0.0112	0.0049	0.0185		0.0113	0.0114	0.0038	0.0202		0.011	0.0114	0.0056	0.0187		0.0103	0.0106	0.0036	0.0195		0.0109	0.01115	0.01475		1.1	1.12	0.49	1.85		1.13	1.14	0.38	2.02		1.1	1.14	0.56	1.87		1.03	1.06	0.36	1.95		1.09	1.115
99		t_n467		0.0119	0.0121	0.0058	0.0201		0.0096	0.0102	0.0036	0.0205		0.0123	0.0126	0.0054	0.0211		0.0085	0.0091	0.0034	0.0176		0.010575	0.011	0.015275		1.19	1.21	0.58	2.01		0.96	1.02	0.36	2.05		1.23	1.26	0.54	2.11		0.85	0.91	0.34	1.76		1.0575	1.1
100		t_n468		0.0354	0.0356	0.0296	0.0431		0.0307	0.0306	0.025	0.0354		0.0347	0.0349	0.0273	0.0438		0.0288	0.0292	0.0206	0.0394		0.0324	0.032575	0.0148		3.54	3.56	2.96	4.31		3.07	3.06	2.5	3.54		3.47	3.49	2.73	4.38		2.88	2.92	2.06	3.94		3.24	3.2575
101		t_n469		0.0285	0.0286	0.0227	0.0353		0.0239	0.0236	0.0145	0.0309		0.028	0.0282	0.0211	0.0363		0.0212	0.0217	0.0134	0.0325		0.0254	0.025525	0.015825		2.85	2.86	2.27	3.53		2.39	2.36	1.45	3.09		2.8	2.82	2.11	3.63		2.12	2.17	1.34	3.25		2.54	2.5525
102		t_n470		0.0167	0.0168	0.0088	0.0253		0.0111	0.0115	0.0046	0.0208		0.0156	0.0157	0.0078	0.0248		0.0099	0.0101	0.0039	0.018		0.013325	0.013525	0.01595		1.67	1.68	0.88	2.53		1.11	1.15	0.46	2.08		1.56	1.57	0.78	2.48		0.99	1.01	0.39	1.8		1.3325	1.3525
103		t_n471		0.0382	0.0385	0.0324	0.0466		0.0326	0.0326	0.0264	0.0403		0.0371	0.0373	0.029	0.0469		0.0316	0.0316	0.0217	0.0425		0.034875	0.035	0.0167		3.82	3.85	3.24	4.66		3.26	3.26	2.64	4.03		3.71	3.73	2.9	4.69		3.16	3.16	2.17	4.25		3.4875	3.5
104		t_n472		0.0339	0.034	0.0275	0.0414		0.0273	0.0272	0.0193	0.0344		0.033	0.0331	0.0253	0.0416		0.0239	0.0248	0.0167	0.0368		0.029525	0.029775	0.01635		3.39	3.4	2.75	4.14		2.73	2.72	1.93	3.44		3.3	3.31	2.53	4.16		2.39	2.48	1.67	3.68		2.9525	2.9775
105		t_n473		0.0297	0.0298	0.0215	0.038		0.022	0.022	0.0126	0.0311		0.0287	0.0286	0.0192	0.0379		0.0189	0.0193	0.0107	0.0312		0.024825	0.024925	0.01855		2.97	2.98	2.15	3.8		2.2	2.2	1.26	3.11		2.87	2.86	1.92	3.79		1.89	1.93	1.07	3.12		2.4825	2.4925
106		t_n474		0.0004	0.0005	0.0001	0.0013		0.0016	0.0019	0.0006	0.0048		0.0007	0.0008	0.0001	0.0022		0.0015	0.0017	0.0005	0.0038		0.00105	0.001225	0.0027		0.04	0.05	0.01	0.13		0.16	0.19	0.06	0.48		0.07	0.08	0.01	0.22		0.15	0.17	0.05	0.38		0.105	0.1225
107		t_n475		0.0002	0.0003	0	0.0009		0.0013	0.0015	0.0004	0.004		0.0004	0.0005	0	0.0015		0.0012	0.0014	0.0004	0.0033		0.000775	0.000925	0.002225		0.02	0.03	0	0.09		0.13	0.15	0.04	0.4		0.04	0.05	0	0.15		0.12	0.14	0.04	0.33		0.0775	0.0925
108		t_n476		0.01	0.0103	0.0045	0.0183		0.0086	0.0092	0.0033	0.0178		0.0106	0.0108	0.0035	0.0188		0.008	0.0084	0.003	0.0166		0.0093	0.009675	0.0143		1	1.03	0.45	1.83		0.86	0.92	0.33	1.78		1.06	1.08	0.35	1.88		0.8	0.84	0.3	1.66		0.93	0.9675
109	Cheirogaleus	t_n477		0.1144	0.116	0.0721	0.1777		0.0827	0.0842	0.0531	0.1305		0.0938	0.0973	0.0663	0.1443		0.0752	0.0761	0.0486	0.1132		0.091525	0.0934	0.0814		11.44	11.6	7.21	17.77		8.27	8.42	5.31	13.05		9.38	9.73	6.63	14.43		7.52	7.61	4.86	11.32		9.1525	9.34
110		t_n478		0.0907	0.093	0.058	0.1428		0.059	0.0628	0.036	0.1032		0.076	0.0789	0.0537	0.117		0.0553	0.0578	0.0375	0.0881		0.07025	0.073125	0.066475		9.07	9.3	5.8	14.28		5.9	6.28	3.6	10.32		7.6	7.89	5.37	11.7		5.53	5.78	3.75	8.81		7.025	7.3125
111		t_n479		0.0638	0.064	0.031	0.1164		0.0497	0.0503	0.0285	0.0866		0.0521	0.053	0.0295	0.0849		0.0455	0.0469	0.0289	0.0745		0.052775	0.05355	0.061125		6.38	6.4	3.1	11.64		4.97	5.03	2.85	8.66		5.21	5.3	2.95	8.49		4.55	4.69	2.89	7.45		5.2775	5.355
112	Indriidae	t_n480		0.2104	0.2121	0.1758	0.2551		0.1682	0.1713	0.1286	0.2301		0.1982	0.1983	0.1587	0.2388		0.1515	0.1561	0.1171	0.2137		0.182075	0.18445	0.089375		21.04	21.21	17.58	25.51		16.82	17.13	12.86	23.01		19.82	19.83	15.87	23.88		15.15	15.61	11.71	21.37		18.2075	18.445
113		t_n481		0.174	0.1745	0.1482	0.2026		0.1363	0.1374	0.1138	0.1681		0.1594	0.1599	0.1334	0.1887		0.1251	0.1257	0.1039	0.1523		0.1487	0.149375	0.0531		17.4	17.45	14.82	20.26		13.63	13.74	11.38	16.81		15.94	15.99	13.34	18.87		12.51	12.57	10.39	15.23		14.87	14.9375
114	Avahi	t_n482		0.0765	0.0791	0.0586	0.1137		0.0538	0.0538	0.0306	0.0915		0.0752	0.076	0.0548	0.1035		0.0466	0.049	0.0272	0.0851		0.063025	0.064475	0.05565		7.65	7.91	5.86	11.37		5.38	5.38	3.06	9.15		7.52	7.6	5.48	10.35		4.66	4.9	2.72	8.51		6.3025	6.4475
115		t_n483		0.034	0.0346	0.0215	0.054		0.0217	0.0223	0.0105	0.0352		0.0322	0.0324	0.0184	0.0484		0.0174	0.018	0.0089	0.0315		0.026325	0.026825	0.02745		3.4	3.46	2.15	5.4		2.17	2.23	1.05	3.52		3.22	3.24	1.84	4.84		1.74	1.8	0.89	3.15		2.6325	2.6825
116		t_n484		0.02	0.0206	0.012	0.0331		0.0131	0.0139	0.0057	0.0261		0.0192	0.0196	0.0104	0.0312		0.0109	0.0115	0.0051	0.0209		0.0158	0.0164	0.019525		2	2.06	1.2	3.31		1.31	1.39	0.57	2.61		1.92	1.96	1.04	3.12		1.09	1.15	0.51	2.09		1.58	1.64
117		t_n485		0.013	0.0136	0.0053	0.0252		0.0063	0.0071	0.0013	0.0177		0.0123	0.0124	0.0024	0.0236		0.0054	0.0059	0.0014	0.0138		0.00925	0.00975	0.017475		1.3	1.36	0.53	2.52		0.63	0.71	0.13	1.77		1.23	1.24	0.24	2.36		0.54	0.59	0.14	1.38		0.925	0.975
118		t_n486		0.0068	0.0074	0.0021	0.0163		0.0035	0.0041	0.0007	0.0111		0.0067	0.0073	0.0019	0.0156		0.0031	0.0037	0.0005	0.0102		0.005025	0.005625	0.012		0.68	0.74	0.21	1.63		0.35	0.41	0.07	1.11		0.67	0.73	0.19	1.56		0.31	0.37	0.05	1.02		0.5025	0.5625
119		t_n487		0.0185	0.0193	0.0119	0.0305		0.0134	0.0144	0.006	0.0279		0.018	0.0187	0.0111	0.0301		0.0129	0.0135	0.0052	0.0244		0.0157	0.016475	0.019675		1.85	1.93	1.19	3.05		1.34	1.44	0.6	2.79		1.8	1.87	1.11	3.01		1.29	1.35	0.52	2.44		1.57	1.6475
120		t_n488		0.0162	0.0169	0.0102	0.0273		0.0109	0.0118	0.0042	0.0245		0.0158	0.0164	0.0096	0.0269		0.0106	0.0113	0.0038	0.0224		0.013375	0.0141	0.018325		1.62	1.69	1.02	2.73		1.09	1.18	0.42	2.45		1.58	1.64	0.96	2.69		1.06	1.13	0.38	2.24		1.3375	1.41
121	Propithecus	t_n489		0.0728	0.073	0.0569	0.0939		0.0548	0.0544	0.0449	0.0637		0.0658	0.0661	0.0485	0.0845		0.0479	0.0481	0.0393	0.0581		0.060325	0.0604	0.02765		7.28	7.3	5.69	9.39		5.48	5.44	4.49	6.37		6.58	6.61	4.85	8.45		4.79	4.81	3.93	5.81		6.0325	6.04
122		t_n490		0.0334	0.0336	0.0217	0.0494		0.0223	0.0229	0.0133	0.0346		0.0314	0.0314	0.0193	0.0445		0.0186	0.0191	0.0121	0.0289		0.026425	0.02675	0.02275		3.34	3.36	2.17	4.94		2.23	2.29	1.33	3.46		3.14	3.14	1.93	4.45		1.86	1.91	1.21	2.89		2.6425	2.675
123		t_n491		0.0181	0.0184	0.0116	0.0271		0.0159	0.016	0.0103	0.0226		0.0164	0.0166	0.0095	0.0245		0.0139	0.014	0.0093	0.0191		0.016075	0.01625	0.01315		1.81	1.84	1.16	2.71		1.59	1.6	1.03	2.26		1.64	1.66	0.95	2.45		1.39	1.4	0.93	1.91		1.6075	1.625
124		t_n492		0.0357	0.0358	0.0282	0.0446		0.0221	0.0223	0.0167	0.0287		0.0326	0.0327	0.0249	0.0412		0.0195	0.0196	0.0147	0.0251		0.027475	0.0276	0.013775		3.57	3.58	2.82	4.46		2.21	2.23	1.67	2.87		3.26	3.27	2.49	4.12		1.95	1.96	1.47	2.51		2.7475	2.76
125		t_n493		0.0188	0.019	0.0114	0.0277		0.016	0.0161	0.0109	0.0221		0.0174	0.0175	0.0103	0.026		0.0144	0.0144	0.0097	0.0195		0.01665	0.01675	0.01325		1.88	1.9	1.14	2.77		1.6	1.61	1.09	2.21		1.74	1.75	1.03	2.6		1.44	1.44	0.97	1.95		1.665	1.675
126	Haplorhini	t_n494		0.587	0.5861	0.5784	0.5889		0.5864	0.5854	0.5762	0.5889		0.6327	0.6329	0.5884	0.6818		0.6412	0.6418	0.5935	0.6959		0.611825	0.61155	0.05475		58.7	58.61	57.84	58.89		58.64	58.54	57.62	58.89		63.27	63.29	58.84	68.18		64.12	64.18	59.35	69.59		61.1825	61.155
127	Tarsiiformes	t_n495		0.2369	0.2493	0.1557	0.3719		0.1331	0.1346	0.0939	0.1971		0.2188	0.23	0.1451	0.3421		0.1261	0.1317	0.0875	0.2022		0.178725	0.1864	0.157775		23.69	24.93	15.57	37.19		13.31	13.46	9.39	19.71		21.88	23	14.51	34.21		12.61	13.17	8.75	20.22		17.8725	18.64
128	Tarsius	t_n496		0.0711	0.0737	0.0395	0.1277		0.0296	0.0293	0.0179	0.0428		0.0742	0.0787	0.0455	0.1352		0.0224	0.0238	0.0129	0.0419		0.049325	0.051375	0.05795		7.11	7.37	3.95	12.77		2.96	2.93	1.79	4.28		7.42	7.87	4.55	13.52		2.24	2.38	1.29	4.19		4.9325	5.1375
129		t_n497		0.0443	0.0479	0.0287	0.079		0.0233	0.0234	0.0133	0.0338		0.0449	0.049	0.0289	0.0818		0.0175	0.0177	0.0087	0.0282		0.0325	0.0345	0.0358		4.43	4.79	2.87	7.9		2.33	2.34	1.33	3.38		4.49	4.9	2.89	8.18		1.75	1.77	0.87	2.82		3.25	3.45
130		t_n498		0.0221	0.0234	0.0081	0.0464		0.0136	0.0141	0.004	0.0272		0.0238	0.0247	0.003	0.0541		0.0092	0.0096	0.0011	0.0207		0.017175	0.01795	0.03305		2.21	2.34	0.81	4.64		1.36	1.41	0.4	2.72		2.38	2.47	0.3	5.41		0.92	0.96	0.11	2.07		1.7175	1.795
131		t_n499		0.0346	0.0371	0.0181	0.0685		0.0172	0.0172	0.0044	0.0297		0.0343	0.0369	0.015	0.0707		0.0127	0.0127	0.0029	0.0223		0.0247	0.025975	0.0377		3.46	3.71	1.81	6.85		1.72	1.72	0.44	2.97		3.43	3.69	1.5	7.07		1.27	1.27	0.29	2.23		2.47	2.5975
132		t_n500		0.0622	0.0607	0.0318	0.0905		0.077	0.0769	0.0545	0.1025		0.0652	0.0642	0.035	0.0903		0.0717	0.0716	0.0509	0.0935		0.069025	0.06835	0.05115		6.22	6.07	3.18	9.05		7.7	7.69	5.45	10.25		6.52	6.42	3.5	9.03		7.17	7.16	5.09	9.35		6.9025	6.835
133	Simiiformes	t_n501		0.428	0.4281	0.3995	0.4573		0.3769	0.3771	0.3446	0.4124		0.4447	0.4445	0.3917	0.4948		0.3735	0.3741	0.3355	0.4163		0.405775	0.40595	0.077375		42.8	42.81	39.95	45.73		37.69	37.71	34.46	41.24		44.47	44.45	39.17	49.48		37.35	37.41	33.55	41.63		40.5775	40.595
134	Platyrrhini	t_n502		0.2401	0.2403	0.2212	0.2595		0.2335	0.2335	0.2146	0.2526		0.2435	0.2434	0.2109	0.2749		0.2155	0.2154	0.1926	0.2378		0.23315	0.23315	0.046375		24.01	24.03	22.12	25.95		23.35	23.35	21.46	25.26		24.35	24.34	21.09	27.49		21.55	21.54	19.26	23.78		23.315	23.315
135	Pitheciidae	t_n503		0.2071	0.2071	0.1882	0.2268		0.1967	0.1968	0.1773	0.2164		0.2087	0.2088	0.1783	0.2383		0.1811	0.1811	0.1597	0.2031		0.1984	0.19845	0.045275		20.71	20.71	18.82	22.68		19.67	19.68	17.73	21.64		20.87	20.88	17.83	23.83		18.11	18.11	15.97	20.31		19.84	19.845
136		t_n504		0.1425	0.1429	0.1225	0.1659		0.1277	0.1271	0.1069	0.1453		0.143	0.1433	0.118	0.1695		0.1175	0.1172	0.0978	0.1351		0.132675	0.132625	0.04265		14.25	14.29	12.25	16.59		12.77	12.71	10.69	14.53		14.3	14.33	11.8	16.95		11.75	11.72	9.78	13.51		13.2675	13.2625
137		t_n505		0.0709	0.0708	0.0572	0.0835		0.0588	0.0604	0.0509	0.076		0.0705	0.0706	0.0551	0.086		0.054	0.0549	0.0451	0.0691		0.06355	0.064175	0.026575		7.09	7.08	5.72	8.35		5.88	6.04	5.09	7.6		7.05	7.06	5.51	8.6		5.4	5.49	4.51	6.91		6.355	6.4175
138	Cacajao	t_n506		0.0344	0.0344	0.0256	0.0439		0.0252	0.0253	0.0182	0.0333		0.0342	0.0342	0.0248	0.0442		0.0215	0.0219	0.016	0.0298		0.028825	0.02895	0.01665		3.44	3.44	2.56	4.39		2.52	2.53	1.82	3.33		3.42	3.42	2.48	4.42		2.15	2.19	1.6	2.98		2.8825	2.895
139		t_n507		0.0097	0.0106	0.0039	0.0227		0.0109	0.0116	0.0034	0.0232		0.01	0.0111	0.0046	0.0239		0.0107	0.0112	0.0038	0.0205		0.010325	0.011125	0.01865		0.97	1.06	0.39	2.27		1.09	1.16	0.34	2.32		1	1.11	0.46	2.39		1.07	1.12	0.38	2.05		1.0325	1.1125
140		t_n508		0.0017	0.0021	0.0002	0.0065		0.0014	0.0019	0.0002	0.0065		0.0019	0.0023	0.0002	0.0064		0.0014	0.0019	0.0001	0.0065		0.0016	0.00205	0.0063		0.17	0.21	0.02	0.65		0.14	0.19	0.02	0.65		0.19	0.23	0.02	0.64		0.14	0.19	0.01	0.65		0.16	0.205
141	Chiropotes	t_n509		0.0328	0.0328	0.0193	0.0488		0.0214	0.0221	0.0121	0.0346		0.0328	0.0328	0.0185	0.0503		0.0182	0.0189	0.011	0.0321		0.0263	0.02665	0.026225		3.28	3.28	1.93	4.88		2.14	2.21	1.21	3.46		3.28	3.28	1.85	5.03		1.82	1.89	1.1	3.21		2.63	2.665
142		t_n510		0.0114	0.0117	0.0063	0.0186		0.0116	0.0118	0.0069	0.0174		0.0117	0.012	0.0068	0.019		0.0107	0.0108	0.0063	0.0161		0.01135	0.011575	0.0112		1.14	1.17	0.63	1.86		1.16	1.18	0.69	1.74		1.17	1.2	0.68	1.9		1.07	1.08	0.63	1.61		1.135	1.1575
143	Pithecia	t_n511		0.0373	0.0389	0.026	0.0588		0.0312	0.0311	0.0227	0.0416		0.038	0.0396	0.0256	0.0601		0.0282	0.0288	0.0197	0.0405		0.033675	0.0346	0.02675		3.73	3.89	2.6	5.88		3.12	3.11	2.27	4.16		3.8	3.96	2.56	6.01		2.82	2.88	1.97	4.05		3.3675	3.46
144		t_n512		0.0047	0.0051	0.0005	0.0124		0.0035	0.0041	0.0004	0.0116		0.0046	0.0051	0.0001	0.0135		0.003	0.0037	0.0006	0.0107		0.00395	0.0045	0.01165		0.47	0.51	0.05	1.24		0.35	0.41	0.04	1.16		0.46	0.51	0.01	1.35		0.3	0.37	0.06	1.07		0.395	0.45
145	Callicebus	t_n513		0.0781	0.0793	0.0664	0.0994		0.0752	0.076	0.0563	0.1038		0.0782	0.079	0.0638	0.1002		0.0704	0.0711	0.0516	0.0963		0.075475	0.07635	0.0404		7.81	7.93	6.64	9.94		7.52	7.6	5.63	10.38		7.82	7.9	6.38	10.02		7.04	7.11	5.16	9.63		7.5475	7.635
146		t_n514		0.0317	0.0328	0.0109	0.0634		0.0163	0.0179	0.0053	0.0353		0.0319	0.0333	0.0104	0.0636		0.0142	0.0149	0.004	0.0325		0.023525	0.024725	0.04105		3.17	3.28	1.09	6.34		1.63	1.79	0.53	3.53		3.19	3.33	1.04	6.36		1.42	1.49	0.4	3.25		2.3525	2.4725
147		t_n515		0.0716	0.0718	0.0614	0.0831		0.0644	0.0651	0.0534	0.0814		0.0713	0.0714	0.0585	0.085		0.0607	0.0609	0.0483	0.0757		0.067	0.0673	0.0259		7.16	7.18	6.14	8.31		6.44	6.51	5.34	8.14		7.13	7.14	5.85	8.5		6.07	6.09	4.83	7.57		6.7	6.73
148		t_n516		0.0359	0.0362	0.0271	0.0481		0.0327	0.0327	0.0254	0.043		0.0357	0.036	0.027	0.0477		0.031	0.0312	0.0225	0.0417		0.033825	0.034025	0.019625		3.59	3.62	2.71	4.81		3.27	3.27	2.54	4.3		3.57	3.6	2.7	4.77		3.1	3.12	2.25	4.17		3.3825	3.4025
149		t_n517		0.0201	0.0203	0.0132	0.0285		0.02	0.0202	0.0133	0.0281		0.0197	0.02	0.013	0.0285		0.0183	0.0185	0.0123	0.0262		0.019525	0.01975	0.014875		2.01	2.03	1.32	2.85		2	2.02	1.33	2.81		1.97	2	1.3	2.85		1.83	1.85	1.23	2.62		1.9525	1.975
150		t_n518		0.0322	0.0322	0.0247	0.0401		0.0309	0.0308	0.0243	0.0367		0.0322	0.0323	0.0239	0.0411		0.0269	0.0271	0.021	0.0342		0.03055	0.0306	0.01455		3.22	3.22	2.47	4.01		3.09	3.08	2.43	3.67		3.22	3.23	2.39	4.11		2.69	2.71	2.1	3.42		3.055	3.06
151		t_n519		0.0224	0.0225	0.0168	0.0291		0.021	0.0211	0.0151	0.0275		0.0223	0.0224	0.016	0.0295		0.0181	0.0181	0.0129	0.0236		0.02095	0.021025	0.012225		2.24	2.25	1.68	2.91		2.1	2.11	1.51	2.75		2.23	2.24	1.6	2.95		1.81	1.81	1.29	2.36		2.095	2.1025
152		t_n520		0.0206	0.0207	0.0148	0.0273		0.019	0.019	0.0126	0.0256		0.0205	0.0207	0.0143	0.0278		0.0163	0.0163	0.011	0.0217		0.0191	0.019175	0.012425		2.06	2.07	1.48	2.73		1.9	1.9	1.26	2.56		2.05	2.07	1.43	2.78		1.63	1.63	1.1	2.17		1.91	1.9175
153		t_n521		0.0085	0.0095	0.0029	0.0213		0.0144	0.0142	0.0054	0.0221		0.0079	0.0088	0.0018	0.021		0.0122	0.0121	0.0049	0.0187		0.01075	0.01115	0.017025		0.85	0.95	0.29	2.13		1.44	1.42	0.54	2.21		0.79	0.88	0.18	2.1		1.22	1.21	0.49	1.87		1.075	1.115
154		t_n522		0.0056	0.0057	0.0008	0.0118		0.0058	0.0061	0.0024	0.0118		0.0052	0.0055	0.0016	0.0107		0.0049	0.005	0.0018	0.0093		0.005375	0.005575	0.00925		0.56	0.57	0.08	1.18		0.58	0.61	0.24	1.18		0.52	0.55	0.16	1.07		0.49	0.5	0.18	0.93		0.5375	0.5575
155		t_n523		0.2281	0.2282	0.2093	0.2464		0.2199	0.2203	0.2032	0.2386		0.2309	0.2307	0.1993	0.2611		0.2034	0.2033	0.1814	0.2249		0.220575	0.220625	0.04445		22.81	22.82	20.93	24.64		21.99	22.03	20.32	23.86		23.09	23.07	19.93	26.11		20.34	20.33	18.14	22.49		22.0575	22.0625
156	Atelidae	t_n524		0.1724	0.1727	0.1525	0.1938		0.136	0.1364	0.1207	0.1547		0.1725	0.1728	0.1451	0.2018		0.125	0.125	0.1094	0.1411		0.151475	0.151725	0.040925		17.24	17.27	15.25	19.38		13.6	13.64	12.07	15.47		17.25	17.28	14.51	20.18		12.5	12.5	10.94	14.11		15.1475	15.1725
157	Alouatta	t_n525		0.0418	0.0422	0.035	0.0515		0.0338	0.0338	0.0289	0.0398		0.0409	0.0412	0.0327	0.0511		0.0298	0.0299	0.0244	0.0364		0.036575	0.036775	0.01445		4.18	4.22	3.5	5.15		3.38	3.38	2.89	3.98		4.09	4.12	3.27	5.11		2.98	2.99	2.44	3.64		3.6575	3.6775
158		t_n526		0.0253	0.0254	0.0155	0.0357		0.0178	0.0181	0.0081	0.0298		0.0249	0.0249	0.0139	0.0361		0.0149	0.0149	0.0062	0.0245		0.020725	0.020825	0.0206		2.53	2.54	1.55	3.57		1.78	1.81	0.81	2.98		2.49	2.49	1.39	3.61		1.49	1.49	0.62	2.45		2.0725	2.0825
159		t_n527		0.0039	0.0044	0.0011	0.0102		0.004	0.005	0.0008	0.014		0.0031	0.0036	0.0006	0.009		0.0027	0.0034	0	0.0108		0.003425	0.0041	0.010375		0.39	0.44	0.11	1.02		0.4	0.5	0.08	1.4		0.31	0.36	0.06	0.9		0.27	0.34	0	1.08		0.3425	0.41
160		t_n528		0.0372	0.0375	0.0314	0.0453		0.0291	0.0292	0.0243	0.0342		0.0367	0.037	0.0297	0.0453		0.0249	0.0251	0.0202	0.0309		0.031975	0.0322	0.012525		3.72	3.75	3.14	4.53		2.91	2.92	2.43	3.42		3.67	3.7	2.97	4.53		2.49	2.51	2.02	3.09		3.1975	3.22
161		t_n529		0.0343	0.0344	0.0279	0.042		0.0263	0.0264	0.0213	0.0316		0.0336	0.0337	0.0265	0.0417		0.0225	0.0226	0.0178	0.0285		0.029175	0.029275	0.012575		3.43	3.44	2.79	4.2		2.63	2.64	2.13	3.16		3.36	3.37	2.65	4.17		2.25	2.26	1.78	2.85		2.9175	2.9275
162		t_n530		0.0308	0.0308	0.0225	0.0388		0.0213	0.021	0.0118	0.0285		0.0304	0.0305	0.022	0.039		0.0181	0.018	0.0107	0.025		0.02515	0.025075	0.016075		3.08	3.08	2.25	3.88		2.13	2.1	1.18	2.85		3.04	3.05	2.2	3.9		1.81	1.8	1.07	2.5		2.515	2.5075
163		t_n531		0.0054	0.0057	0.0012	0.012		0.0038	0.0045	0.0009	0.0126		0.005	0.0055	0.0015	0.0121		0.0037	0.0043	0.001	0.0102		0.004475	0.005	0.010575		0.54	0.57	0.12	1.2		0.38	0.45	0.09	1.26		0.5	0.55	0.15	1.21		0.37	0.43	0.1	1.02		0.4475	0.5
164		t_n532		0.0003	0.0005	0	0.002		0.0002	0.0003	0	0.0012		0.0002	0.0004	0	0.0014		0.0002	0.0004	0	0.0016		0.000225	0.0004	0.00155		0.03	0.05	0	0.2		0.02	0.03	0	0.12		0.02	0.04	0	0.14		0.02	0.04	0	0.16		0.0225	0.04
165		t_n533		0.0287	0.0282	0.0145	0.0396		0.0227	0.022	0.0099	0.0311		0.0275	0.0273	0.0143	0.0389		0.0181	0.0176	0.0071	0.0268		0.02425	0.023775	0.02265		2.87	2.82	1.45	3.96		2.27	2.2	0.99	3.11		2.75	2.73	1.43	3.89		1.81	1.76	0.71	2.68		2.425	2.3775
166		t_n534		0.1328	0.1332	0.1159	0.1516		0.0965	0.0966	0.0821	0.1129		0.1327	0.1329	0.1101	0.1583		0.0887	0.0887	0.0754	0.1021		0.112675	0.11285	0.03535		13.28	13.32	11.59	15.16		9.65	9.66	8.21	11.29		13.27	13.29	11.01	15.83		8.87	8.87	7.54	10.21		11.2675	11.285
167		t_n535		0.1151	0.1154	0.0977	0.1352		0.0848	0.085	0.0701	0.1012		0.1152	0.1157	0.0937	0.1405		0.0785	0.0785	0.0658	0.0921		0.0984	0.09865	0.035425		11.51	11.54	9.77	13.52		8.48	8.5	7.01	10.12		11.52	11.57	9.37	14.05		7.85	7.85	6.58	9.21		9.84	9.865
168	Brachyteles	t_n536		0.0329	0.0327	0.017	0.0512		0.022	0.0222	0.0147	0.0311		0.0319	0.0321	0.0184	0.0484		0.019	0.0191	0.013	0.0261		0.02645	0.026525	0.023425		3.29	3.27	1.7	5.12		2.2	2.22	1.47	3.11		3.19	3.21	1.84	4.84		1.9	1.91	1.3	2.61		2.645	2.6525
169	Lagothrix	t_n537		0.0094	0.0105	0.0046	0.024		0.0101	0.0118	0.0045	0.0289		0.0085	0.0093	0.0034	0.0209		0.009	0.0099	0.0039	0.0203		0.00925	0.010375	0.019425		0.94	1.05	0.46	2.4		1.01	1.18	0.45	2.89		0.85	0.93	0.34	2.09		0.9	0.99	0.39	2.03		0.925	1.0375
170		t_n538		0.0056	0.0057	0.0028	0.0094		0.0041	0.0042	0.0021	0.0068		0.0055	0.0055	0.0023	0.0091		0.0038	0.0038	0.0019	0.0063		0.00475	0.0048	0.005625		0.56	0.57	0.28	0.94		0.41	0.42	0.21	0.68		0.55	0.55	0.23	0.91		0.38	0.38	0.19	0.63		0.475	0.48
171		t_n539		0.004	0.0041	0.0014	0.0077		0.003	0.003	0.0006	0.0058		0.0039	0.004	0.0012	0.0075		0.0029	0.0029	0.0009	0.0053		0.00345	0.0035	0.00555		0.4	0.41	0.14	0.77		0.3	0.3	0.06	0.58		0.39	0.4	0.12	0.75		0.29	0.29	0.09	0.53		0.345	0.35
172	Ateles	t_n540		0.0353	0.0355	0.0282	0.0443		0.0225	0.0226	0.0178	0.0284		0.0344	0.0346	0.0267	0.0432		0.0197	0.0199	0.0158	0.0247		0.027975	0.02815	0.013025		3.53	3.55	2.82	4.43		2.25	2.26	1.78	2.84		3.44	3.46	2.67	4.32		1.97	1.99	1.58	2.47		2.7975	2.815
173		t_n541		0.0252	0.0253	0.02	0.0313		0.0139	0.014	0.0102	0.0181		0.0245	0.0246	0.0192	0.0311		0.0124	0.0125	0.0095	0.016		0.019	0.0191	0.0094		2.52	2.53	2	3.13		1.39	1.4	1.02	1.81		2.45	2.46	1.92	3.11		1.24	1.25	0.95	1.6		1.9	1.91
174		t_n542		0.0244	0.0246	0.0193	0.0306		0.0135	0.0136	0.0098	0.0177		0.0237	0.0239	0.0185	0.0304		0.012	0.0122	0.0091	0.0156		0.0184	0.018575	0.0094		2.44	2.46	1.93	3.06		1.35	1.36	0.98	1.77		2.37	2.39	1.85	3.04		1.2	1.22	0.91	1.56		1.84	1.8575
175		t_n543		0.0181	0.0181	0.012	0.0244		0.0078	0.0079	0.0046	0.0115		0.0171	0.0172	0.0114	0.0238		0.0067	0.0068	0.0041	0.0099		0.012425	0.0125	0.009375		1.81	1.81	1.2	2.44		0.78	0.79	0.46	1.15		1.71	1.72	1.14	2.38		0.67	0.68	0.41	0.99		1.2425	1.25
176		t_n544		0.0142	0.0144	0.0097	0.0199		0.0076	0.0077	0.0046	0.0114		0.0134	0.0135	0.0087	0.0192		0.0066	0.0067	0.004	0.01		0.01045	0.010575	0.008375		1.42	1.44	0.97	1.99		0.76	0.77	0.46	1.14		1.34	1.35	0.87	1.92		0.66	0.67	0.4	1		1.045	1.0575
177		t_n545		0.0049	0.0052	0.0006	0.0125		0.0034	0.0036	0.0007	0.0079		0.0051	0.0054	0.0006	0.0124		0.0031	0.0033	0.0009	0.0067		0.004125	0.004375	0.009175		0.49	0.52	0.06	1.25		0.34	0.36	0.07	0.79		0.51	0.54	0.06	1.24		0.31	0.33	0.09	0.67		0.4125	0.4375
178	Cebidae	t_n546		0.2056	0.2057	0.1872	0.2235		0.1957	0.1958	0.1798	0.2124		0.2069	0.207	0.1785	0.2356		0.181	0.1807	0.1607	0.2004		0.1973	0.1973	0.041425		20.56	20.57	18.72	22.35		19.57	19.58	17.98	21.24		20.69	20.7	17.85	23.56		18.1	18.07	16.07	20.04		19.73	19.73
179	Saimiri + Cebus	t_n547		0.1805	0.1803	0.1626	0.1989		0.171	0.1711	0.1532	0.1902		0.1803	0.1806	0.1542	0.2079		0.1585	0.158	0.1376	0.1778		0.172575	0.1725	0.0418		18.05	18.03	16.26	19.89		17.1	17.11	15.32	19.02		18.03	18.06	15.42	20.79		15.85	15.8	13.76	17.78		17.2575	17.25
180	Saimiri	t_n548		0.0194	0.0198	0.0135	0.0288		0.0161	0.0163	0.0119	0.0213		0.0192	0.0194	0.0131	0.0277		0.0144	0.0145	0.0106	0.019		0.017275	0.0175	0.011925		1.94	1.98	1.35	2.88		1.61	1.63	1.19	2.13		1.92	1.94	1.31	2.77		1.44	1.45	1.06	1.9		1.7275	1.75
181		t_n549		0.0128	0.013	0.0092	0.018		0.0088	0.009	0.0053	0.0138		0.0126	0.0127	0.0086	0.0174		0.0077	0.0079	0.0044	0.0125		0.010475	0.01065	0.00855		1.28	1.3	0.92	1.8		0.88	0.9	0.53	1.38		1.26	1.27	0.86	1.74		0.77	0.79	0.44	1.25		1.0475	1.065
182		t_n550		0.008	0.0083	0.0047	0.0131		0.0053	0.0054	0.0031	0.0083		0.0077	0.0079	0.0047	0.0122		0.0046	0.0047	0.0026	0.0071		0.0064	0.006575	0.0064		0.8	0.83	0.47	1.31		0.53	0.54	0.31	0.83		0.77	0.79	0.47	1.22		0.46	0.47	0.26	0.71		0.64	0.6575
183	Cebus	t_n551		0.0677	0.0675	0.0521	0.0824		0.0504	0.0502	0.0398	0.0597		0.0657	0.0661	0.0497	0.0833		0.044	0.0442	0.0355	0.0537		0.05695	0.057	0.0255		6.77	6.75	5.21	8.24		5.04	5.02	3.98	5.97		6.57	6.61	4.97	8.33		4.4	4.42	3.55	5.37		5.695	5.7
184		t_n552		0.0216	0.0221	0.0147	0.0316		0.0142	0.0143	0.0103	0.0192		0.0194	0.0198	0.0131	0.0286		0.0123	0.0125	0.0088	0.0167		0.016875	0.017175	0.0123		2.16	2.21	1.47	3.16		1.42	1.43	1.03	1.92		1.94	1.98	1.31	2.86		1.23	1.25	0.88	1.67		1.6875	1.7175
185		t_n553		0.003	0.0035	0.0003	0.0092		0.0024	0.003	0.0006	0.0084		0.0029	0.0034	0.0005	0.0096		0.0019	0.0023	0.0004	0.0063		0.00255	0.00305	0.007925		0.3	0.35	0.03	0.92		0.24	0.3	0.06	0.84		0.29	0.34	0.05	0.96		0.19	0.23	0.04	0.63		0.255	0.305
186		t_n554		0.0195	0.0198	0.0112	0.0298		0.0117	0.0118	0.0079	0.0167		0.0169	0.0171	0.0089	0.0267		0.0102	0.0103	0.0068	0.0145		0.014575	0.01475	0.013225		1.95	1.98	1.12	2.98		1.17	1.18	0.79	1.67		1.69	1.71	0.89	2.67		1.02	1.03	0.68	1.45		1.4575	1.475
187		t_n555		0.0183	0.0184	0.013	0.0243		0.0146	0.0147	0.0106	0.0193		0.018	0.0181	0.0127	0.0249		0.0131	0.0132	0.0094	0.0176		0.016	0.0161	0.0101		1.83	1.84	1.3	2.43		1.46	1.47	1.06	1.93		1.8	1.81	1.27	2.49		1.31	1.32	0.94	1.76		1.6	1.61
188		t_n556		0.0166	0.0167	0.0115	0.0223		0.0134	0.0135	0.0093	0.018		0.0164	0.0166	0.0115	0.023		0.0121	0.0122	0.0085	0.0165		0.014625	0.01475	0.00975		1.66	1.67	1.15	2.23		1.34	1.35	0.93	1.8		1.64	1.66	1.15	2.3		1.21	1.22	0.85	1.65		1.4625	1.475
189		t_n557		0.0062	0.0065	0.0011	0.0136		0.0047	0.0051	0.0012	0.0118		0.0049	0.0053	0.0002	0.0129		0.0044	0.0046	0.0003	0.0101		0.00505	0.005375	0.0114		0.62	0.65	0.11	1.36		0.47	0.51	0.12	1.18		0.49	0.53	0.02	1.29		0.44	0.46	0.03	1.01		0.505	0.5375
190		t_n558		0.2016	0.2016	0.1837	0.2193		0.1917	0.1918	0.1758	0.2085		0.2029	0.2029	0.1748	0.2308		0.1772	0.1771	0.1574	0.197		0.19335	0.19335	0.040975		20.16	20.16	18.37	21.93		19.17	19.18	17.58	20.85		20.29	20.29	17.48	23.08		17.72	17.71	15.74	19.7		19.335	19.335
191		t_n559		0.1466	0.1467	0.129	0.1631		0.1373	0.1373	0.1243	0.15		0.1456	0.146	0.1251	0.168		0.1262	0.1261	0.1116	0.1405		0.138925	0.139025	0.0329		14.66	14.67	12.9	16.31		13.73	13.73	12.43	15		14.56	14.6	12.51	16.8		12.62	12.61	11.16	14.05		13.8925	13.9025
192	Saguinus	t_n560		0.0744	0.0744	0.0644	0.0849		0.0622	0.0623	0.0538	0.0723		0.0729	0.073	0.0599	0.0869		0.0559	0.0562	0.0482	0.0656		0.06635	0.066475	0.02085		7.44	7.44	6.44	8.49		6.22	6.23	5.38	7.23		7.29	7.3	5.99	8.69		5.59	5.62	4.82	6.56		6.635	6.6475
193		t_n561		0.028	0.0283	0.0168	0.0404		0.0283	0.0283	0.016	0.0448		0.0283	0.0288	0.0176	0.042		0.0224	0.0241	0.012	0.0425		0.02675	0.027375	0.026825		2.8	2.83	1.68	4.04		2.83	2.83	1.6	4.48		2.83	2.88	1.76	4.2		2.24	2.41	1.2	4.25		2.675	2.7375
194		t_n562		0.0212	0.0215	0.0128	0.0316		0.0205	0.0208	0.0107	0.032		0.0213	0.0218	0.0134	0.033		0.0164	0.0168	0.0083	0.0286		0.01985	0.020225	0.02		2.12	2.15	1.28	3.16		2.05	2.08	1.07	3.2		2.13	2.18	1.34	3.3		1.64	1.68	0.83	2.86		1.985	2.0225
195		t_n563		0.0194	0.0197	0.0109	0.0299		0.0167	0.0171	0.0076	0.0287		0.0196	0.0201	0.0117	0.0312		0.0131	0.0137	0.0064	0.0236		0.0172	0.01765	0.0192		1.94	1.97	1.09	2.99		1.67	1.71	0.76	2.87		1.96	2.01	1.17	3.12		1.31	1.37	0.64	2.36		1.72	1.765
196		t_n564		0.0024	0.0026	0.0006	0.0057		0.0021	0.0027	0.0004	0.0087		0.0021	0.0024	0.0005	0.006		0.0019	0.0022	0	0.0063		0.002125	0.002475	0.0063		0.24	0.26	0.06	0.57		0.21	0.27	0.04	0.87		0.21	0.24	0.05	0.6		0.19	0.22	0	0.63		0.2125	0.2475
197		t_n565		0.063	0.063	0.054	0.0726		0.0539	0.0535	0.0456	0.061		0.0615	0.0618	0.0507	0.0738		0.0482	0.0482	0.0411	0.0558		0.05665	0.056625	0.01795		6.3	6.3	5.4	7.26		5.39	5.35	4.56	6.1		6.15	6.18	5.07	7.38		4.82	4.82	4.11	5.58		5.665	5.6625
198		t_n566		0.0542	0.0542	0.0449	0.0639		0.0422	0.042	0.0334	0.05		0.0527	0.0528	0.0414	0.0646		0.0378	0.0378	0.0311	0.0448		0.046725	0.0467	0.018125		5.42	5.42	4.49	6.39		4.22	4.2	3.34	5		5.27	5.28	4.14	6.46		3.78	3.78	3.11	4.48		4.6725	4.67
199		t_n567		0.007	0.0071	0.0035	0.0116		0.0054	0.0055	0.0027	0.0089		0.0067	0.0069	0.0039	0.011		0.0049	0.005	0.0028	0.0078		0.006	0.006125	0.0066		0.7	0.71	0.35	1.16		0.54	0.55	0.27	0.89		0.67	0.69	0.39	1.1		0.49	0.5	0.28	0.78		0.6	0.6125
200		t_n568		0.0285	0.0287	0.0209	0.0378		0.0235	0.0236	0.0178	0.0303		0.0267	0.0269	0.0199	0.0352		0.0204	0.0205	0.0157	0.0259		0.024775	0.024925	0.013725		2.85	2.87	2.09	3.78		2.35	2.36	1.78	3.03		2.67	2.69	1.99	3.52		2.04	2.05	1.57	2.59		2.4775	2.4925
201		t_n569		0.0057	0.0059	0.0008	0.0129		0.0086	0.0086	0.0029	0.0143		0.0053	0.0054	0.0008	0.0111		0.0075	0.0076	0.003	0.0127		0.006775	0.006875	0.010875		0.57	0.59	0.08	1.29		0.86	0.86	0.29	1.43		0.53	0.54	0.08	1.11		0.75	0.76	0.3	1.27		0.6775	0.6875
202		t_n570		0.0095	0.0108	0.0031	0.0311		0.0122	0.0126	0.0028	0.0248		0.0081	0.0089	0.0021	0.0239		0.0089	0.0094	0.0001	0.021		0.009675	0.010425	0.023175		0.95	1.08	0.31	3.11		1.22	1.26	0.28	2.48		0.81	0.89	0.21	2.39		0.89	0.94	0.01	2.1		0.9675	1.0425
203		t_n571		0.043	0.0445	0.0316	0.0632		0.0336	0.0353	0.0255	0.0534		0.041	0.0428	0.0294	0.0633		0.0334	0.0335	0.0212	0.0486		0.03775	0.039025	0.0302		4.3	4.45	3.16	6.32		3.36	3.53	2.55	5.34		4.1	4.28	2.94	6.33		3.34	3.35	2.12	4.86		3.775	3.9025
204		t_n572		0.0339	0.0338	0.0266	0.0415		0.0276	0.0277	0.0212	0.0341		0.0327	0.0329	0.0249	0.0415		0.0237	0.024	0.0182	0.0316		0.029475	0.0296	0.01445		3.39	3.38	2.66	4.15		2.76	2.77	2.12	3.41		3.27	3.29	2.49	4.15		2.37	2.4	1.82	3.16		2.9475	2.96
205		t_n573		0.0189	0.0191	0.0125	0.0268		0.0148	0.015	0.01	0.0206		0.0179	0.0182	0.0117	0.0262		0.0132	0.0133	0.009	0.0184		0.0162	0.0164	0.0122		1.89	1.91	1.25	2.68		1.48	1.5	1	2.06		1.79	1.82	1.17	2.62		1.32	1.33	0.9	1.84		1.62	1.64
206		t_n574		0.1392	0.1393	0.122	0.1554		0.1307	0.1306	0.1177	0.1434		0.1382	0.1385	0.1184	0.1595		0.1202	0.1202	0.1059	0.1345		0.132075	0.13215	0.0322		13.92	13.93	12.2	15.54		13.07	13.06	11.77	14.34		13.82	13.85	11.84	15.95		12.02	12.02	10.59	13.45		13.2075	13.215
207	Leontopithecus	t_n575		0.0056	0.0059	0.0026	0.011		0.0045	0.0046	0.0024	0.0073		0.0057	0.006	0.0032	0.0104		0.004	0.0041	0.0021	0.0068		0.00495	0.00515	0.0063		0.56	0.59	0.26	1.1		0.45	0.46	0.24	0.73		0.57	0.6	0.32	1.04		0.4	0.41	0.21	0.68		0.495	0.515
208		t_n576		0.001	0.0012	0	0.0035		0.0015	0.0016	0.0002	0.0039		0.0014	0.0015	0.0001	0.0036		0.0011	0.0012	0	0.0034		0.00125	0.001375	0.003525		0.1	0.12	0	0.35		0.15	0.16	0.02	0.39		0.14	0.15	0.01	0.36		0.11	0.12	0	0.34		0.125	0.1375
209		t_n577		0.122	0.1221	0.1052	0.1384		0.1091	0.1092	0.0965	0.1226		0.1207	0.1209	0.1026	0.141		0.1004	0.1006	0.0877	0.1145		0.11305	0.1132	0.031125		12.2	12.21	10.52	13.84		10.91	10.92	9.65	12.26		12.07	12.09	10.26	14.1		10.04	10.06	8.77	11.45		11.305	11.32
210	Callithrix	t_n578		0.0699	0.0718	0.0452	0.1144		0.0569	0.0616	0.0435	0.0976		0.0711	0.0731	0.0423	0.1138		0.05	0.0539	0.0381	0.088		0.061975	0.0651	0.061175		6.99	7.18	4.52	11.44		5.69	6.16	4.35	9.76		7.11	7.31	4.23	11.38		5	5.39	3.81	8.8		6.1975	6.51
211		t_n579		0.0504	0.0509	0.0398	0.0648		0.0439	0.0442	0.0373	0.0527		0.0497	0.0501	0.0385	0.064		0.0401	0.0402	0.0336	0.0472		0.046025	0.04635	0.019875		5.04	5.09	3.98	6.48		4.39	4.42	3.73	5.27		4.97	5.01	3.85	6.4		4.01	4.02	3.36	4.72		4.6025	4.635
212		t_n580		0.0237	0.024	0.0176	0.0321		0.0277	0.0278	0.0212	0.0345		0.0231	0.0234	0.0164	0.0321		0.0239	0.0242	0.0182	0.0316		0.0246	0.02485	0.014225		2.37	2.4	1.76	3.21		2.77	2.78	2.12	3.45		2.31	2.34	1.64	3.21		2.39	2.42	1.82	3.16		2.46	2.485
213		t_n581		0.0117	0.0119	0.0081	0.0172		0.0086	0.0087	0.0059	0.0118		0.0115	0.0117	0.0078	0.0168		0.0076	0.0077	0.0052	0.0106		0.00985	0.01	0.00735		1.17	1.19	0.81	1.72		0.86	0.87	0.59	1.18		1.15	1.17	0.78	1.68		0.76	0.77	0.52	1.06		0.985	1
214		t_n582		0.0097	0.0098	0.0064	0.0143		0.0079	0.0079	0.0051	0.011		0.0095	0.0097	0.0061	0.0139		0.007	0.0071	0.0046	0.0099		0.008525	0.008625	0.006725		0.97	0.98	0.64	1.43		0.79	0.79	0.51	1.1		0.95	0.97	0.61	1.39		0.7	0.71	0.46	0.99		0.8525	0.8625
215		t_n583		0.0072	0.0074	0.0037	0.012		0.0046	0.0046	0.0021	0.0075		0.0072	0.0074	0.0038	0.0116		0.0043	0.0044	0.0023	0.0069		0.005825	0.00595	0.006525		0.72	0.74	0.37	1.2		0.46	0.46	0.21	0.75		0.72	0.74	0.38	1.16		0.43	0.44	0.23	0.69		0.5825	0.595
216		t_n584		0.0395	0.0401	0.0316	0.0514		0.035	0.036	0.0302	0.0445		0.0389	0.0396	0.031	0.0511		0.0337	0.0338	0.0274	0.0405		0.036775	0.037375	0.016825		3.95	4.01	3.16	5.14		3.5	3.6	3.02	4.45		3.89	3.96	3.1	5.11		3.37	3.38	2.74	4.05		3.6775	3.7375
217		t_n585		0.0217	0.0222	0.0155	0.0313		0.0161	0.0162	0.0115	0.0216		0.0216	0.0221	0.0153	0.0314		0.0148	0.0149	0.0108	0.0198		0.01855	0.01885	0.01275		2.17	2.22	1.55	3.13		1.61	1.62	1.15	2.16		2.16	2.21	1.53	3.14		1.48	1.49	1.08	1.98		1.855	1.885
218		t_n586		0.0115	0.0116	0.0033	0.0213		0.0089	0.0091	0.0021	0.0175		0.0119	0.0119	0.0026	0.0223		0.0092	0.0092	0.0022	0.0163		0.010375	0.01045	0.0168		1.15	1.16	0.33	2.13		0.89	0.91	0.21	1.75		1.19	1.19	0.26	2.23		0.92	0.92	0.22	1.63		1.0375	1.045
219		t_n587		0.0048	0.0056	0.0008	0.0143		0.0046	0.0055	0.0005	0.0144		0.0049	0.0057	0.0007	0.0155		0.0057	0.006	0.0008	0.0131		0.005	0.0057	0.013625		0.48	0.56	0.08	1.43		0.46	0.55	0.05	1.44		0.49	0.57	0.07	1.55		0.57	0.6	0.08	1.31		0.5	0.57
220		t_n588		0.0247	0.0248	0.0129	0.037		0.0189	0.0191	0.0062	0.0326		0.0236	0.0238	0.0128	0.0365		0.0163	0.0163	0.006	0.0273		0.020875	0.021	0.023875		2.47	2.48	1.29	3.7		1.89	1.91	0.62	3.26		2.36	2.38	1.28	3.65		1.63	1.63	0.6	2.73		2.0875	2.1
221	Aotus	t_n589		0.0372	0.0374	0.0317	0.0437		0.0318	0.0316	0.0258	0.0367		0.0364	0.0366	0.0298	0.0443		0.0264	0.0267	0.0209	0.0338		0.03295	0.033075	0.012575		3.72	3.74	3.17	4.37		3.18	3.16	2.58	3.67		3.64	3.66	2.98	4.43		2.64	2.67	2.09	3.38		3.295	3.3075
222		t_n590		0.0326	0.0327	0.0269	0.0391		0.0248	0.025	0.0181	0.0326		0.0316	0.0318	0.025	0.0395		0.0197	0.02	0.0146	0.027		0.027175	0.027375	0.0134		3.26	3.27	2.69	3.91		2.48	2.5	1.81	3.26		3.16	3.18	2.5	3.95		1.97	2	1.46	2.7		2.7175	2.7375
223		t_n591		0.0294	0.0295	0.0241	0.0356		0.0212	0.0213	0.0161	0.0269		0.0284	0.0286	0.0225	0.0356		0.0175	0.0175	0.0131	0.0225		0.024125	0.024225	0.0112		2.94	2.95	2.41	3.56		2.12	2.13	1.61	2.69		2.84	2.86	2.25	3.56		1.75	1.75	1.31	2.25		2.4125	2.4225
224		t_n592		0.0199	0.0198	0.0121	0.0269		0.0122	0.0124	0.005	0.0207		0.0192	0.0192	0.0114	0.0269		0.0099	0.01	0.0035	0.017		0.0153	0.01535	0.014875		1.99	1.98	1.21	2.69		1.22	1.24	0.5	2.07		1.92	1.92	1.14	2.69		0.99	1	0.35	1.7		1.53	1.535
225		t_n593		0.0359	0.036	0.0303	0.0421		0.0267	0.0267	0.0205	0.0329		0.035	0.0352	0.0286	0.0425		0.0218	0.022	0.0166	0.0282		0.02985	0.029975	0.012425		3.59	3.6	3.03	4.21		2.67	2.67	2.05	3.29		3.5	3.52	2.86	4.25		2.18	2.2	1.66	2.82		2.985	2.9975
226		t_n594		0.0129	0.0131	0.0079	0.0192		0.0124	0.0128	0.0057	0.0218		0.0127	0.0129	0.0076	0.0199		0.0098	0.0102	0.0045	0.0182		0.01195	0.01225	0.01335		1.29	1.31	0.79	1.92		1.24	1.28	0.57	2.18		1.27	1.29	0.76	1.99		0.98	1.02	0.45	1.82		1.195	1.225
227		t_n595		0.0042	0.0043	0.0024	0.0067		0.004	0.0041	0.0018	0.0073		0.004	0.0041	0.0022	0.0065		0.0033	0.0034	0.0013	0.0061		0.003875	0.003975	0.004725		0.42	0.43	0.24	0.67		0.4	0.41	0.18	0.73		0.4	0.41	0.22	0.65		0.33	0.34	0.13	0.61		0.3875	0.3975
228	Catarrhini	t_n596		0.2773	0.2773	0.2509	0.3027		0.2229	0.2247	0.2069	0.2533		0.2875	0.2878	0.2484	0.3283		0.2108	0.2128	0.1967	0.2382		0.249625	0.25065	0.0549		27.73	27.73	25.09	30.27		22.29	22.47	20.69	25.33		28.75	28.78	24.84	32.83		21.08	21.28	19.67	23.82		24.9625	25.065
229	Hominoidea	t_n597		0.2028	0.2022	0.1761	0.2242		0.1458	0.1468	0.1345	0.1639		0.2096	0.2093	0.1771	0.239		0.1355	0.136	0.1244	0.1512		0.173425	0.173575	0.04155		20.28	20.22	17.61	22.42		14.58	14.68	13.45	16.39		20.96	20.93	17.71	23.9		13.55	13.6	12.44	15.12		17.3425	17.3575
230	Hominidae	t_n598		0.1738	0.1732	0.1469	0.1961		0.1291	0.1297	0.1183	0.1451		0.18	0.1798	0.1504	0.208		0.1201	0.1208	0.1104	0.1348		0.15075	0.150875	0.0395		17.38	17.32	14.69	19.61		12.91	12.97	11.83	14.51		18	17.98	15.04	20.8		12.01	12.08	11.04	13.48		15.075	15.0875
231	Pongo	t_n599		0.0162	0.0169	0.0081	0.0299		0.0092	0.0094	0.0059	0.014		0.0161	0.0166	0.0078	0.029		0.0081	0.0082	0.0051	0.0118		0.0124	0.012775	0.01445		1.62	1.69	0.81	2.99		0.92	0.94	0.59	1.4		1.61	1.66	0.78	2.9		0.81	0.82	0.51	1.18		1.24	1.2775
232	Homininae	t_n600		0.0952	0.0947	0.075	0.1121		0.0657	0.0661	0.0576	0.0768		0.0974	0.0975	0.0792	0.1166		0.0627	0.063	0.0553	0.0723		0.08025	0.080325	0.027675		9.52	9.47	7.5	11.21		6.57	6.61	5.76	7.68		9.74	9.75	7.92	11.66		6.27	6.3	5.53	7.23		8.025	8.0325
233	Homo + Pan	t_n601		0.0765	0.0763	0.0605	0.0907		0.0556	0.0565	0.0513	0.0662		0.0794	0.0793	0.0642	0.095		0.0541	0.0544	0.0474	0.0624		0.0664	0.066625	0.022725		7.65	7.63	6.05	9.07		5.56	5.65	5.13	6.62		7.94	7.93	6.42	9.5		5.41	5.44	4.74	6.24		6.64	6.6625
234	Pan	t_n602		0.0214	0.0219	0.012	0.035		0.0112	0.0114	0.0072	0.0162		0.0206	0.0211	0.0114	0.0333		0.01	0.0102	0.0067	0.0143		0.0158	0.01615	0.015375		2.14	2.19	1.2	3.5		1.12	1.14	0.72	1.62		2.06	2.11	1.14	3.33		1	1.02	0.67	1.43		1.58	1.615
235	Gorilla	t_n603		0.0217	0.0218	0.0012	0.0435		0.0138	0.0149	0.0015	0.0329		0.0215	0.0217	0.002	0.0464		0.0081	0.0093	0.0001	0.0243		0.016275	0.016925	0.035575		2.17	2.18	0.12	4.35		1.38	1.49	0.15	3.29		2.15	2.17	0.2	4.64		0.81	0.93	0.01	2.43		1.6275	1.6925
236	Hylobatidae	t_n604		0.077	0.0775	0.0647	0.0924		0.057	0.0603	0.047	0.0917		0.0772	0.0778	0.0627	0.0973		0.0497	0.0516	0.0392	0.0779		0.065225	0.0668	0.036425		7.7	7.75	6.47	9.24		5.7	6.03	4.7	9.17		7.72	7.78	6.27	9.73		4.97	5.16	3.92	7.79		6.5225	6.68
237	Hoolock	t_n605		0.0262	0.0262	0.0107	0.0431		0.0132	0.015	0.004	0.0339		0.0253	0.0256	0.0098	0.044		0.0107	0.0117	0.0022	0.0262		0.01885	0.019625	0.030125		2.62	2.62	1.07	4.31		1.32	1.5	0.4	3.39		2.53	2.56	0.98	4.4		1.07	1.17	0.22	2.62		1.885	1.9625
238		t_n606		0.0694	0.0695	0.0585	0.0805		0.0477	0.0479	0.0397	0.0561		0.0692	0.0696	0.0565	0.0844		0.0413	0.0414	0.035	0.0486		0.0569	0.0571	0.019975		6.94	6.95	5.85	8.05		4.77	4.79	3.97	5.61		6.92	6.96	5.65	8.44		4.13	4.14	3.5	4.86		5.69	5.71
239		t_n607		0.0633	0.0633	0.0526	0.0745		0.0437	0.0438	0.0353	0.0523		0.0627	0.0631	0.0502	0.0777		0.0378	0.038	0.032	0.045		0.051875	0.05205	0.01985		6.33	6.33	5.26	7.45		4.37	4.38	3.53	5.23		6.27	6.31	5.02	7.77		3.78	3.8	3.2	4.5		5.1875	5.205
240	Hylobates	t_n608		0.0369	0.0371	0.0296	0.0453		0.0246	0.025	0.0188	0.033		0.036	0.0364	0.0279	0.0468		0.0206	0.0209	0.0162	0.0276		0.029525	0.02985	0.01505		3.69	3.71	2.96	4.53		2.46	2.5	1.88	3.3		3.6	3.64	2.79	4.68		2.06	2.09	1.62	2.76		2.9525	2.985
241		t_n609		0.0284	0.0285	0.0226	0.0349		0.0192	0.0193	0.0155	0.0238		0.0275	0.0279	0.0215	0.0357		0.0164	0.0165	0.0133	0.0201		0.022875	0.02305	0.0104		2.84	2.85	2.26	3.49		1.92	1.93	1.55	2.38		2.75	2.79	2.15	3.57		1.64	1.65	1.33	2.01		2.2875	2.305
242		t_n610		0.0254	0.0255	0.0201	0.0313		0.0168	0.0169	0.0131	0.0213		0.0246	0.0249	0.0192	0.032		0.0143	0.0144	0.0113	0.018		0.020275	0.020425	0.009725		2.54	2.55	2.01	3.13		1.68	1.69	1.31	2.13		2.46	2.49	1.92	3.2		1.43	1.44	1.13	1.8		2.0275	2.0425
243		t_n611		0.0202	0.0203	0.0145	0.0263		0.0136	0.0136	0.0085	0.0187		0.0195	0.0198	0.0141	0.0267		0.0114	0.0114	0.0074	0.0155		0.016175	0.016275	0.010675		2.02	2.03	1.45	2.63		1.36	1.36	0.85	1.87		1.95	1.98	1.41	2.67		1.14	1.14	0.74	1.55		1.6175	1.6275
244		t_n612		0.0221	0.0222	0.0171	0.0278		0.0141	0.0142	0.0109	0.0181		0.0213	0.0216	0.0163	0.0282		0.012	0.0121	0.0093	0.0154		0.017375	0.017525	0.008975		2.21	2.22	1.71	2.78		1.41	1.42	1.09	1.81		2.13	2.16	1.63	2.82		1.2	1.21	0.93	1.54		1.7375	1.7525
245		t_n613		0.0095	0.0096	0.0045	0.0152		0.0069	0.007	0.0025	0.0122		0.0094	0.0096	0.005	0.0155		0.0056	0.0057	0.0021	0.0104		0.00785	0.007975	0.0098		0.95	0.96	0.45	1.52		0.69	0.7	0.25	1.22		0.94	0.96	0.5	1.55		0.56	0.57	0.21	1.04		0.785	0.7975
246		t_n614		0.0134	0.0135	0.0088	0.0192		0.0089	0.0091	0.0043	0.0146		0.0133	0.0135	0.0084	0.02		0.0079	0.0079	0.0038	0.0122		0.010875	0.011	0.010175		1.34	1.35	0.88	1.92		0.89	0.91	0.43	1.46		1.33	1.35	0.84	2		0.79	0.79	0.38	1.22		1.0875	1.1
247		t_n615		0.0103	0.0104	0.006	0.0157		0.0062	0.0064	0.0024	0.0119		0.0097	0.0097	0.0046	0.0156		0.0052	0.0053	0.0018	0.0097		0.00785	0.00795	0.009525		1.03	1.04	0.6	1.57		0.62	0.64	0.24	1.19		0.97	0.97	0.46	1.56		0.52	0.53	0.18	0.97		0.785	0.795
248	Nomascus	t_n616		0.0293	0.0296	0.0203	0.0397		0.0262	0.026	0.0142	0.0359		0.0298	0.0302	0.0207	0.0419		0.0203	0.0207	0.0122	0.0313		0.0264	0.026625	0.02035		2.93	2.96	2.03	3.97		2.62	2.6	1.42	3.59		2.98	3.02	2.07	4.19		2.03	2.07	1.22	3.13		2.64	2.6625
249		t_n617		0.0142	0.0143	0.0109	0.0184		0.0082	0.0083	0.0059	0.0112		0.0142	0.0144	0.0106	0.0192		0.0073	0.0074	0.0053	0.0098		0.010975	0.0111	0.006475		1.42	1.43	1.09	1.84		0.82	0.83	0.59	1.12		1.42	1.44	1.06	1.92		0.73	0.74	0.53	0.98		1.0975	1.11
250		t_n618		0.0099	0.01	0.0071	0.0136		0.0062	0.0063	0.0042	0.0088		0.0099	0.01	0.0069	0.0138		0.0056	0.0056	0.0038	0.0077		0.0079	0.007975	0.005475		0.99	1	0.71	1.36		0.62	0.63	0.42	0.88		0.99	1	0.69	1.38		0.56	0.56	0.38	0.77		0.79	0.7975
251		t_n619		0.0032	0.0032	0.0017	0.0052		0.0025	0.0026	0.0013	0.0042		0.0032	0.0033	0.0018	0.0055		0.0023	0.0023	0.0011	0.0038		0.0028	0.00285	0.0032		0.32	0.32	0.17	0.52		0.25	0.26	0.13	0.42		0.32	0.33	0.18	0.55		0.23	0.23	0.11	0.38		0.28	0.285
252		t_n620		0.0206	0.0209	0.0122	0.0316		0.0172	0.0177	0.0084	0.0292		0.0204	0.0209	0.0123	0.0321		0.0135	0.0137	0.006	0.0228		0.017925	0.0183	0.0192		2.06	2.09	1.22	3.16		1.72	1.77	0.84	2.92		2.04	2.09	1.23	3.21		1.35	1.37	0.6	2.28		1.7925	1.83
253	Cercopithecoidea = Cercopithecidae	t_n621		0.1554	0.1557	0.139	0.1734		0.1134	0.1138	0.1022	0.1276		0.1567	0.1568	0.1334	0.1827		0.1004	0.1006	0.0893	0.1135		0.131475	0.131725	0.033325		15.54	15.57	13.9	17.34		11.34	11.38	10.22	12.76		15.67	15.68	13.34	18.27		10.04	10.06	8.93	11.35		13.1475	13.1725
254	Cercpithecinae	t_n622		0.0991	0.0992	0.0878	0.1118		0.0745	0.0747	0.0682	0.0824		0.0976	0.098	0.0819	0.116		0.0619	0.0621	0.0541	0.0711		0.083275	0.0835	0.022325		9.91	9.92	8.78	11.18		7.45	7.47	6.82	8.24		9.76	9.8	8.19	11.6		6.19	6.21	5.41	7.11		8.3275	8.35
255	Papionini	t_n623		0.0788	0.0789	0.07	0.0887		0.0569	0.0575	0.0551	0.0624		0.0771	0.0774	0.0647	0.0913		0.0449	0.0451	0.0394	0.0527		0.064425	0.064725	0.016475		7.88	7.89	7	8.87		5.69	5.75	5.51	6.24		7.71	7.74	6.47	9.13		4.49	4.51	3.94	5.27		6.4425	6.4725
256	Macaca	t_n624		0.0466	0.0467	0.0396	0.0545		0.0328	0.0327	0.0288	0.0363		0.045	0.0452	0.0366	0.0547		0.0273	0.0274	0.0234	0.0317		0.037925	0.038	0.0122		4.66	4.67	3.96	5.45		3.28	3.27	2.88	3.63		4.5	4.52	3.66	5.47		2.73	2.74	2.34	3.17		3.7925	3.8
257		t_n625		0.0386	0.0386	0.0331	0.0449		0.0277	0.0277	0.0243	0.031		0.037	0.0373	0.0305	0.045		0.0232	0.0232	0.02	0.0268		0.031625	0.0317	0.00995		3.86	3.86	3.31	4.49		2.77	2.77	2.43	3.1		3.7	3.73	3.05	4.5		2.32	2.32	2	2.68		3.1625	3.17
258		t_n626		0.0302	0.0302	0.0248	0.0363		0.0207	0.0208	0.0177	0.0242		0.0288	0.0291	0.0231	0.0358		0.0176	0.0176	0.0148	0.0207		0.024325	0.024425	0.00915		3.02	3.02	2.48	3.63		2.07	2.08	1.77	2.42		2.88	2.91	2.31	3.58		1.76	1.76	1.48	2.07		2.4325	2.4425
259		t_n627		0.0218	0.0218	0.0175	0.0266		0.016	0.016	0.0128	0.0195		0.0207	0.0209	0.0162	0.0262		0.0138	0.0138	0.0109	0.0169		0.018075	0.018125	0.00795		2.18	2.18	1.75	2.66		1.6	1.6	1.28	1.95		2.07	2.09	1.62	2.62		1.38	1.38	1.09	1.69		1.8075	1.8125
260		t_n628		0.0214	0.0214	0.0171	0.0262		0.0124	0.0125	0.0092	0.016		0.0203	0.0205	0.0159	0.0256		0.0107	0.0107	0.0078	0.0138		0.0162	0.016275	0.0079		2.14	2.14	1.71	2.62		1.24	1.25	0.92	1.6		2.03	2.05	1.59	2.56		1.07	1.07	0.78	1.38		1.62	1.6275
261		t_n629		0.0171	0.0172	0.013	0.022		0.012	0.012	0.0073	0.0165		0.0162	0.0164	0.012	0.0216		0.0105	0.0105	0.0067	0.0145		0.01395	0.014025	0.0089		1.71	1.72	1.3	2.2		1.2	1.2	0.73	1.65		1.62	1.64	1.2	2.16		1.05	1.05	0.67	1.45		1.395	1.4025
262		t_n630		0.0104	0.0105	0.0057	0.0163		0.0058	0.0061	0.0021	0.0118		0.0095	0.0096	0.0046	0.0153		0.0053	0.0056	0.0019	0.0104		0.00775	0.00795	0.009875		1.04	1.05	0.57	1.63		0.58	0.61	0.21	1.18		0.95	0.96	0.46	1.53		0.53	0.56	0.19	1.04		0.775	0.795
263		t_n631		0.0194	0.0196	0.0157	0.0241		0.0124	0.0125	0.0102	0.0151		0.0186	0.0188	0.0146	0.0238		0.0106	0.0107	0.0088	0.013		0.01525	0.0154	0.006675		1.94	1.96	1.57	2.41		1.24	1.25	1.02	1.51		1.86	1.88	1.46	2.38		1.06	1.07	0.88	1.3		1.525	1.54
264		t_n632		0.0187	0.0188	0.0149	0.0233		0.012	0.012	0.0097	0.0146		0.0179	0.018	0.0138	0.023		0.0102	0.0103	0.0084	0.0126		0.0147	0.014775	0.006675		1.87	1.88	1.49	2.33		1.2	1.2	0.97	1.46		1.79	1.8	1.38	2.3		1.02	1.03	0.84	1.26		1.47	1.4775
265		t_n633		0.0177	0.0178	0.0139	0.0223		0.011	0.0111	0.0087	0.0137		0.0169	0.017	0.0129	0.0218		0.0094	0.0095	0.0075	0.0118		0.01375	0.01385	0.00665		1.77	1.78	1.39	2.23		1.1	1.11	0.87	1.37		1.69	1.7	1.29	2.18		0.94	0.95	0.75	1.18		1.375	1.385
266		t_n634		0.0145	0.0146	0.0108	0.0188		0.0095	0.0095	0.0072	0.0121		0.0139	0.014	0.0103	0.0186		0.0082	0.0082	0.0063	0.0105		0.011525	0.011575	0.00635		1.45	1.46	1.08	1.88		0.95	0.95	0.72	1.21		1.39	1.4	1.03	1.86		0.82	0.82	0.63	1.05		1.1525	1.1575
267		t_n635		0.017	0.0171	0.0134	0.0216		0.0109	0.0109	0.0085	0.0136		0.0162	0.0164	0.0125	0.0212		0.0093	0.0094	0.0073	0.0117		0.01335	0.01345	0.0066		1.7	1.71	1.34	2.16		1.09	1.09	0.85	1.36		1.62	1.64	1.25	2.12		0.93	0.94	0.73	1.17		1.335	1.345
268		t_n636		0.0084	0.0084	0.0049	0.0125		0.0053	0.0054	0.0026	0.0086		0.0077	0.0078	0.0045	0.012		0.0045	0.0045	0.0019	0.0075		0.006475	0.006525	0.006675		0.84	0.84	0.49	1.25		0.53	0.54	0.26	0.86		0.77	0.78	0.45	1.2		0.45	0.45	0.19	0.75		0.6475	0.6525
269		t_n637		0.0316	0.0316	0.0268	0.0371		0.0232	0.0232	0.02	0.0265		0.0304	0.0306	0.0247	0.0372		0.0196	0.0197	0.0167	0.0228		0.0262	0.026275	0.00885		3.16	3.16	2.68	3.71		2.32	2.32	2	2.65		3.04	3.06	2.47	3.72		1.96	1.97	1.67	2.28		2.62	2.6275
270		t_n638		0.0296	0.0297	0.0248	0.0352		0.0197	0.0198	0.0163	0.0235		0.0285	0.0286	0.0229	0.0352		0.0167	0.0168	0.0137	0.0201		0.023625	0.023725	0.009075		2.96	2.97	2.48	3.52		1.97	1.98	1.63	2.35		2.85	2.86	2.29	3.52		1.67	1.68	1.37	2.01		2.3625	2.3725
271		t_n639		0.0242	0.0242	0.0193	0.0299		0.0164	0.0164	0.0126	0.0203		0.023	0.0232	0.0178	0.0293		0.0138	0.0138	0.0106	0.0173		0.01935	0.0194	0.009125		2.42	2.42	1.93	2.99		1.64	1.64	1.26	2.03		2.3	2.32	1.78	2.93		1.38	1.38	1.06	1.73		1.935	1.94
272		t_n640		0.0192	0.0194	0.0146	0.0249		0.0131	0.0132	0.0092	0.0174		0.0184	0.0185	0.0136	0.0243		0.011	0.0111	0.0077	0.0148		0.015425	0.01555	0.009075		1.92	1.94	1.46	2.49		1.31	1.32	0.92	1.74		1.84	1.85	1.36	2.43		1.1	1.11	0.77	1.48		1.5425	1.555
273		t_n641		0.0055	0.0056	0.0028	0.009		0.0059	0.006	0.003	0.01		0.0051	0.0053	0.0026	0.0088		0.0051	0.0053	0.0027	0.0087		0.0054	0.00555	0.00635		0.55	0.56	0.28	0.9		0.59	0.6	0.3	1		0.51	0.53	0.26	0.88		0.51	0.53	0.27	0.87		0.54	0.555
274		t_n642		0.0103	0.0104	0.0038	0.0182		0.0097	0.0097	0.0032	0.0162		0.0096	0.0099	0.0032	0.0189		0.0078	0.008	0.0032	0.0135		0.00935	0.0095	0.01335		1.03	1.04	0.38	1.82		0.97	0.97	0.32	1.62		0.96	0.99	0.32	1.89		0.78	0.8	0.32	1.35		0.935	0.95
275		t_n643		0.0275	0.0276	0.023	0.0328		0.0201	0.0201	0.0168	0.0237		0.0265	0.0267	0.0213	0.0331		0.0171	0.0171	0.0142	0.0202		0.0228	0.022875	0.008625		2.75	2.76	2.3	3.28		2.01	2.01	1.68	2.37		2.65	2.67	2.13	3.31		1.71	1.71	1.42	2.02		2.28	2.2875
276		t_n644		0.0189	0.019	0.0152	0.0236		0.0134	0.0134	0.0102	0.017		0.0184	0.0186	0.0141	0.0237		0.0116	0.0116	0.009	0.0144		0.015575	0.01565	0.00755		1.89	1.9	1.52	2.36		1.34	1.34	1.02	1.7		1.84	1.86	1.41	2.37		1.16	1.16	0.9	1.44		1.5575	1.565
277		t_n645		0.0175	0.0176	0.0137	0.022		0.0123	0.0123	0.0092	0.0159		0.0171	0.0172	0.0128	0.0223		0.0106	0.0107	0.0081	0.0135		0.014375	0.01445	0.007475		1.75	1.76	1.37	2.2		1.23	1.23	0.92	1.59		1.71	1.72	1.28	2.23		1.06	1.07	0.81	1.35		1.4375	1.445
278		t_n646		0.0681	0.0683	0.0595	0.0779		0.0489	0.0491	0.0449	0.0542		0.066	0.0665	0.0551	0.0795		0.0376	0.0378	0.0324	0.0439		0.05515	0.055425	0.0159		6.81	6.83	5.95	7.79		4.89	4.91	4.49	5.42		6.6	6.65	5.51	7.95		3.76	3.78	3.24	4.39		5.515	5.5425
279		t_n647		0.0397	0.0399	0.0357	0.0452		0.0353	0.0354	0.035	0.0364		0.0392	0.0394	0.033	0.0468		0.0232	0.0236	0.0188	0.0289		0.03435	0.034575	0.0087		3.97	3.99	3.57	4.52		3.53	3.54	3.5	3.64		3.92	3.94	3.3	4.68		2.32	2.36	1.88	2.89		3.435	3.4575
280		t_n648		0.0327	0.0328	0.0276	0.039		0.0273	0.0272	0.0228	0.0314		0.032	0.0323	0.0258	0.04		0.0192	0.0193	0.0151	0.024		0.0278	0.0279	0.010775		3.27	3.28	2.76	3.9		2.73	2.72	2.28	3.14		3.2	3.23	2.58	4		1.92	1.93	1.51	2.4		2.78	2.79
281		t_n649		0.018	0.0182	0.0135	0.0237		0.0163	0.0165	0.0107	0.0234		0.0174	0.0176	0.0125	0.024		0.0125	0.0126	0.0082	0.0177		0.01605	0.016225	0.010975		1.8	1.82	1.35	2.37		1.63	1.65	1.07	2.34		1.74	1.76	1.25	2.4		1.25	1.26	0.82	1.77		1.605	1.6225
282	Papio	t_n650		0.0129	0.013	0.0101	0.0164		0.0093	0.0094	0.0068	0.0121		0.0124	0.0126	0.0094	0.0166		0.0075	0.0076	0.0055	0.01		0.010525	0.01065	0.005825		1.29	1.3	1.01	1.64		0.93	0.94	0.68	1.21		1.24	1.26	0.94	1.66		0.75	0.76	0.55	1		1.0525	1.065
283		t_n651		0.0121	0.0122	0.0095	0.0153		0.0084	0.0085	0.0062	0.0112		0.0117	0.0118	0.0087	0.0157		0.0069	0.0069	0.005	0.0092		0.009775	0.00985	0.0055		1.21	1.22	0.95	1.53		0.84	0.85	0.62	1.12		1.17	1.18	0.87	1.57		0.69	0.69	0.5	0.92		0.9775	0.985
284		t_n652		0.0111	0.0111	0.0084	0.0144		0.0076	0.0076	0.0051	0.0104		0.0107	0.0108	0.0078	0.0147		0.0062	0.0062	0.0041	0.0086		0.0089	0.008925	0.005675		1.11	1.11	0.84	1.44		0.76	0.76	0.51	1.04		1.07	1.08	0.78	1.47		0.62	0.62	0.41	0.86		0.89	0.8925
285		t_n653		0.0073	0.0074	0.0047	0.0106		0.0049	0.0049	0.0025	0.0079		0.007	0.0071	0.0043	0.0104		0.004	0.004	0.002	0.0065		0.0058	0.00585	0.005475		0.73	0.74	0.47	1.06		0.49	0.49	0.25	0.79		0.7	0.71	0.43	1.04		0.4	0.4	0.2	0.65		0.58	0.585
286	Lophocebus	t_n654		0.0024	0.0024	0.0001	0.0055		0.0021	0.0021	0.0003	0.0042		0.0029	0.0031	0.0008	0.0065		0.0017	0.0018	0.0004	0.0034		0.002275	0.00235	0.0045		0.24	0.24	0.01	0.55		0.21	0.21	0.03	0.42		0.29	0.31	0.08	0.65		0.17	0.18	0.04	0.34		0.2275	0.235
287		t_n655		0.0465	0.0466	0.0389	0.0546		0.0334	0.0333	0.0284	0.0387		0.046	0.0462	0.0369	0.0563		0.0268	0.027	0.0223	0.0323		0.038175	0.038275	0.01385		4.65	4.66	3.89	5.46		3.34	3.33	2.84	3.87		4.6	4.62	3.69	5.63		2.68	2.7	2.23	3.23		3.8175	3.8275
288		t_n656		0.0114	0.0118	0.0069	0.0181		0.0087	0.0088	0.0055	0.0131		0.0109	0.0111	0.0062	0.0173		0.0073	0.0074	0.0046	0.0108		0.009575	0.009775	0.009025		1.14	1.18	0.69	1.81		0.87	0.88	0.55	1.31		1.09	1.11	0.62	1.73		0.73	0.74	0.46	1.08		0.9575	0.9775
289		t_n657		0.0355	0.0355	0.0282	0.043		0.0261	0.0261	0.0209	0.0314		0.0349	0.035	0.0268	0.0437		0.021	0.0212	0.0167	0.0261		0.029375	0.02945	0.0129		3.55	3.55	2.82	4.3		2.61	2.61	2.09	3.14		3.49	3.5	2.68	4.37		2.1	2.12	1.67	2.61		2.9375	2.945
290		t_n658		0.0043	0.0044	0.0007	0.0086		0.003	0.0031	0.0009	0.0061		0.004	0.0042	0.0006	0.0084		0.0025	0.0026	0.0004	0.0054		0.00345	0.003575	0.006475		0.43	0.44	0.07	0.86		0.3	0.31	0.09	0.61		0.4	0.42	0.06	0.84		0.25	0.26	0.04	0.54		0.345	0.3575
291		t_n659		0.0025	0.0026	0.0002	0.0056		0.0014	0.0016	0.0001	0.0042		0.0023	0.0023	0	0.0053		0.0012	0.0014	0.0001	0.0037		0.00185	0.001975	0.0046		0.25	0.26	0.02	0.56		0.14	0.16	0.01	0.42		0.23	0.23	0	0.53		0.12	0.14	0.01	0.37		0.185	0.1975
292		t_n660		0.0085	0.0101	0.0005	0.0282		0.0098	0.0104	0.0008	0.024		0.0071	0.0104	0.0006	0.0305		0.0078	0.0085	0.0008	0.02		0.0083	0.00985	0.025		0.85	1.01	0.05	2.82		0.98	1.04	0.08	2.4		0.71	1.04	0.06	3.05		0.78	0.85	0.08	2		0.83	0.985
293	Cercopithecini	t_n661		0.0763	0.0764	0.0674	0.0863		0.0505	0.0508	0.045	0.0573		0.0752	0.0755	0.0625	0.0896		0.0431	0.0433	0.0378	0.0498		0.061275	0.0615	0.017575		7.63	7.64	6.74	8.63		5.05	5.08	4.5	5.73		7.52	7.55	6.25	8.96		4.31	4.33	3.78	4.98		6.1275	6.15
294	Cercopithecus + Cercocebus + Erythrocebus	t_n662		0.0709	0.0711	0.0625	0.0809		0.046	0.0462	0.0411	0.0525		0.0697	0.0701	0.0577	0.0836		0.0396	0.0397	0.0345	0.0458		0.05655	0.056775	0.01675		7.09	7.11	6.25	8.09		4.6	4.62	4.11	5.25		6.97	7.01	5.77	8.36		3.96	3.97	3.45	4.58		5.655	5.6775
295		t_n663		0.0568	0.0569	0.0486	0.0662		0.0333	0.0332	0.0291	0.0366		0.0553	0.0555	0.0447	0.0675		0.0283	0.0284	0.0236	0.0339		0.043425	0.0435	0.01455		5.68	5.69	4.86	6.62		3.33	3.32	2.91	3.66		5.53	5.55	4.47	6.75		2.83	2.84	2.36	3.39		4.3425	4.35
296		t_n664		0.0501	0.0493	0.0345	0.0618		0.0276	0.027	0.0171	0.034		0.0477	0.0473	0.031	0.0627		0.0214	0.0216	0.0138	0.0302		0.0367	0.0363	0.023075		5.01	4.93	3.45	6.18		2.76	2.7	1.71	3.4		4.77	4.73	3.1	6.27		2.14	2.16	1.38	3.02		3.67	3.63
297		t_n665		0.0213	0.0215	0.0174	0.0267		0.0114	0.0114	0.0087	0.0144		0.0203	0.0206	0.0157	0.0266		0.0095	0.0096	0.0073	0.0123		0.015625	0.015775	0.007725		2.13	2.15	1.74	2.67		1.14	1.14	0.87	1.44		2.03	2.06	1.57	2.66		0.95	0.96	0.73	1.23		1.5625	1.5775
298		t_n666		0.0202	0.0203	0.0165	0.025		0.0109	0.0109	0.0083	0.0139		0.0193	0.0195	0.015	0.0252		0.0091	0.0092	0.007	0.0117		0.014875	0.014975	0.00725		2.02	2.03	1.65	2.5		1.09	1.09	0.83	1.39		1.93	1.95	1.5	2.52		0.91	0.92	0.7	1.17		1.4875	1.4975
299		t_n667		0.0119	0.012	0.0091	0.0155		0.0084	0.0084	0.0058	0.0114		0.0114	0.0116	0.0084	0.0158		0.007	0.0071	0.0048	0.0098		0.009675	0.009775	0.0061		1.19	1.2	0.91	1.55		0.84	0.84	0.58	1.14		1.14	1.16	0.84	1.58		0.7	0.71	0.48	0.98		0.9675	0.9775
300		t_n668		0.0094	0.0095	0.007	0.0124		0.0067	0.0068	0.0042	0.0098		0.0089	0.0091	0.0065	0.0127		0.0056	0.0057	0.0034	0.0083		0.00765	0.007775	0.005525		0.94	0.95	0.7	1.24		0.67	0.68	0.42	0.98		0.89	0.91	0.65	1.27		0.56	0.57	0.34	0.83		0.765	0.7775
301		t_n669		0.052	0.0523	0.0438	0.0617		0.0311	0.031	0.0268	0.0347		0.0507	0.0509	0.0404	0.0631		0.0263	0.0265	0.0217	0.0318		0.040025	0.040175	0.01465		5.2	5.23	4.38	6.17		3.11	3.1	2.68	3.47		5.07	5.09	4.04	6.31		2.63	2.65	2.17	3.18		4.0025	4.0175
302		t_n670		0.0363	0.0365	0.0236	0.0511		0.0177	0.0178	0.0093	0.0271		0.0356	0.0359	0.024	0.0498		0.0144	0.0144	0.0074	0.0219		0.026	0.02615	0.0214		3.63	3.65	2.36	5.11		1.77	1.78	0.93	2.71		3.56	3.59	2.4	4.98		1.44	1.44	0.74	2.19		2.6	2.615
303		t_n671		0.0123	0.0124	0.0012	0.0247		0.0082	0.0087	0.0018	0.0178		0.0118	0.0123	0.004	0.024		0.0064	0.0066	0.0007	0.0142		0.009675	0.01	0.01825		1.23	1.24	0.12	2.47		0.82	0.87	0.18	1.78		1.18	1.23	0.4	2.4		0.64	0.66	0.07	1.42		0.9675	1
304		t_n672		0.0624	0.0625	0.0535	0.072		0.0344	0.0344	0.0309	0.0387		0.0614	0.0615	0.0501	0.0744		0.0305	0.0306	0.0252	0.0367		0.047175	0.04725	0.015525		6.24	6.25	5.35	7.2		3.44	3.44	3.09	3.87		6.14	6.15	5.01	7.44		3.05	3.06	2.52	3.67		4.7175	4.725
305		t_n673		0.0587	0.0589	0.0503	0.0683		0.0328	0.0327	0.0291	0.0358		0.0577	0.058	0.0469	0.0703		0.0286	0.0287	0.0236	0.0345		0.04445	0.044575	0.01475		5.87	5.89	5.03	6.83		3.28	3.27	2.91	3.58		5.77	5.8	4.69	7.03		2.86	2.87	2.36	3.45		4.445	4.4575
306		t_n674		0.0562	0.0563	0.0469	0.0661		0.0306	0.0305	0.0257	0.0344		0.0552	0.0555	0.0442	0.0682		0.0265	0.0266	0.0212	0.0327		0.042125	0.042225	0.01585		5.62	5.63	4.69	6.61		3.06	3.05	2.57	3.44		5.52	5.55	4.42	6.82		2.65	2.66	2.12	3.27		4.2125	4.2225
307		t_n675		0.0228	0.0231	0.0147	0.0328		0.0164	0.0164	0.0108	0.0221		0.0231	0.0234	0.0151	0.0337		0.0144	0.0145	0.0097	0.0199		0.019175	0.01935	0.01455		2.28	2.31	1.47	3.28		1.64	1.64	1.08	2.21		2.31	2.34	1.51	3.37		1.44	1.45	0.97	1.99		1.9175	1.935
308		t_n676		0.0145	0.0145	0.0021	0.0284		0.009	0.0093	0.0008	0.0186		0.0162	0.0162	0.0043	0.0295		0.0061	0.0067	0.0001	0.0165		0.01145	0.011675	0.021425		1.45	1.45	0.21	2.84		0.9	0.93	0.08	1.86		1.62	1.62	0.43	2.95		0.61	0.67	0.01	1.65		1.145	1.1675
309		t_n677		0.0539	0.0542	0.0455	0.0638		0.0299	0.0298	0.0258	0.0335		0.0529	0.0533	0.0424	0.0659		0.0259	0.026	0.0211	0.0315		0.04065	0.040825	0.014975		5.39	5.42	4.55	6.38		2.99	2.98	2.58	3.35		5.29	5.33	4.24	6.59		2.59	2.6	2.11	3.15		4.065	4.0825
310		t_n678		0.0401	0.0406	0.0339	0.0499		0.0226	0.0226	0.0188	0.027		0.0393	0.0397	0.0315	0.0511		0.0195	0.0195	0.0159	0.0233		0.030375	0.0306	0.0128		4.01	4.06	3.39	4.99		2.26	2.26	1.88	2.7		3.93	3.97	3.15	5.11		1.95	1.95	1.59	2.33		3.0375	3.06
311		t_n679		0.0288	0.0286	0.0179	0.0389		0.0173	0.0172	0.0111	0.0235		0.0281	0.0282	0.0166	0.0403		0.0148	0.0148	0.0093	0.0201		0.02225	0.0222	0.016975		2.88	2.86	1.79	3.89		1.73	1.72	1.11	2.35		2.81	2.82	1.66	4.03		1.48	1.48	0.93	2.01		2.225	2.22
312		t_n680		0.0074	0.0076	0.0025	0.0141		0.0046	0.0046	0.0016	0.0082		0.0073	0.0074	0.0019	0.014		0.0038	0.0039	0.0008	0.0072		0.005775	0.005875	0.009175		0.74	0.76	0.25	1.41		0.46	0.46	0.16	0.82		0.73	0.74	0.19	1.4		0.38	0.39	0.08	0.72		0.5775	0.5875
313		t_n681		0.0364	0.0368	0.0297	0.0454		0.0196	0.0196	0.015	0.0244		0.0358	0.0361	0.0276	0.0469		0.0169	0.017	0.0129	0.0212		0.027175	0.027375	0.013175		3.64	3.68	2.97	4.54		1.96	1.96	1.5	2.44		3.58	3.61	2.76	4.69		1.69	1.7	1.29	2.12		2.7175	2.7375
314		t_n682		0.02	0.0202	0.0139	0.0279		0.0123	0.0124	0.0089	0.0165		0.0192	0.0195	0.013	0.0276		0.0108	0.0109	0.0076	0.0149		0.015575	0.01575	0.010875		2	2.02	1.39	2.79		1.23	1.24	0.89	1.65		1.92	1.95	1.3	2.76		1.08	1.09	0.76	1.49		1.5575	1.575
315		t_n683		0.0155	0.0154	0.0068	0.023		0.0092	0.0091	0.0037	0.0144		0.0151	0.0151	0.0061	0.0237		0.0076	0.0076	0.0025	0.0131		0.01185	0.0118	0.013775		1.55	1.54	0.68	2.3		0.92	0.91	0.37	1.44		1.51	1.51	0.61	2.37		0.76	0.76	0.25	1.31		1.185	1.18
316		t_n684		0.0049	0.0055	0.0006	0.0142		0.0046	0.0047	0.0002	0.0111		0.005	0.0056	0.0004	0.0141		0.0037	0.0041	0.0003	0.0099		0.00455	0.004975	0.01195		0.49	0.55	0.06	1.42		0.46	0.47	0.02	1.11		0.5	0.56	0.04	1.41		0.37	0.41	0.03	0.99		0.455	0.4975
317		t_n685		0.0725	0.0725	0.0617	0.083		0.0478	0.0481	0.0411	0.0557		0.0719	0.0721	0.0584	0.0865		0.041	0.0411	0.035	0.0478		0.0583	0.05845	0.0192		7.25	7.25	6.17	8.3		4.78	4.81	4.11	5.57		7.19	7.21	5.84	8.65		4.1	4.11	3.5	4.78		5.83	5.845
318	Miopithecus	t_n686		0.0346	0.0363	0.0156	0.0673		0.026	0.0256	0.0086	0.0442		0.0333	0.0351	0.0141	0.0665		0.0201	0.0213	0.0085	0.0387		0.0285	0.029575	0.042475		3.46	3.63	1.56	6.73		2.6	2.56	0.86	4.42		3.33	3.51	1.41	6.65		2.01	2.13	0.85	3.87		2.85	2.9575
319	Colobinae	t_n687		0.1014	0.1016	0.0899	0.1142		0.0787	0.0789	0.0709	0.0885		0.1031	0.1032	0.0863	0.1204		0.0701	0.0704	0.0625	0.0794		0.088325	0.088525	0.023225		10.14	10.16	8.99	11.42		7.87	7.89	7.09	8.85		10.31	10.32	8.63	12.04		7.01	7.04	6.25	7.94		8.8325	8.8525
320	Presbytini	t_n688		0.0784	0.0786	0.0692	0.0882		0.0575	0.0579	0.0532	0.0645		0.079	0.0792	0.0661	0.0929		0.0517	0.0518	0.0459	0.0585		0.06665	0.066875	0.017425		7.84	7.86	6.92	8.82		5.75	5.79	5.32	6.45		7.9	7.92	6.61	9.29		5.17	5.18	4.59	5.85		6.665	6.6875
321		t_n689		0.076	0.076	0.0666	0.0856		0.0559	0.0562	0.0514	0.0622		0.0766	0.0767	0.0636	0.09		0.0499	0.0501	0.0442	0.0564		0.0646	0.06475	0.0171		7.6	7.6	6.66	8.56		5.59	5.62	5.14	6.22		7.66	7.67	6.36	9		4.99	5.01	4.42	5.64		6.46	6.475
322	Trachypithecus + Semnopithecus	t_n690		0.0573	0.0575	0.0476	0.0684		0.029	0.0291	0.0242	0.0341		0.0549	0.0554	0.0461	0.0671		0.0247	0.0248	0.0208	0.0295		0.041475	0.0417	0.0151		5.73	5.75	4.76	6.84		2.9	2.91	2.42	3.41		5.49	5.54	4.61	6.71		2.47	2.48	2.08	2.95		4.1475	4.17
323		t_n691		0.0259	0.026	0.0198	0.033		0.0179	0.0179	0.0139	0.0223		0.0256	0.0258	0.0192	0.0333		0.0155	0.0155	0.012	0.0193		0.021225	0.0213	0.01075		2.59	2.6	1.98	3.3		1.79	1.79	1.39	2.23		2.56	2.58	1.92	3.33		1.55	1.55	1.2	1.93		2.1225	2.13
324		t_n692		0.0097	0.01	0.0036	0.0182		0.0075	0.0079	0.0026	0.0153		0.0091	0.0095	0.0032	0.018		0.0067	0.0069	0.0019	0.0134		0.00825	0.008575	0.0134		0.97	1	0.36	1.82		0.75	0.79	0.26	1.53		0.91	0.95	0.32	1.8		0.67	0.69	0.19	1.34		0.825	0.8575
325		t_n693		0.0236	0.0237	0.0173	0.0307		0.0162	0.0163	0.012	0.0209		0.0232	0.0234	0.0169	0.031		0.014	0.014	0.0101	0.0181		0.01925	0.01935	0.0111		2.36	2.37	1.73	3.07		1.62	1.63	1.2	2.09		2.32	2.34	1.69	3.1		1.4	1.4	1.01	1.81		1.925	1.935
326		t_n694		0.0192	0.0194	0.0136	0.026		0.0135	0.0136	0.0091	0.0188		0.0189	0.0191	0.013	0.0264		0.0117	0.0117	0.0076	0.016		0.015825	0.01595	0.010975		1.92	1.94	1.36	2.6		1.35	1.36	0.91	1.88		1.89	1.91	1.3	2.64		1.17	1.17	0.76	1.6		1.5825	1.595
327		t_n695		0.0114	0.0115	0.0072	0.0164		0.0078	0.008	0.0049	0.0118		0.011	0.0112	0.0069	0.0163		0.0067	0.0068	0.0041	0.01		0.009225	0.009375	0.00785		1.14	1.15	0.72	1.64		0.78	0.8	0.49	1.18		1.1	1.12	0.69	1.63		0.67	0.68	0.41	1		0.9225	0.9375
328		t_n696		0.0017	0.002	0.0005	0.0053		0.0026	0.003	0.0001	0.0085		0.0019	0.0024	0.0002	0.0075		0.0022	0.0028	0.0005	0.0075		0.0021	0.00255	0.006875		0.17	0.2	0.05	0.53		0.26	0.3	0.01	0.85		0.19	0.24	0.02	0.75		0.22	0.28	0.05	0.75		0.21	0.255
329		t_n697		0.0231	0.0232	0.0183	0.0289		0.0144	0.0145	0.0115	0.0179		0.0224	0.0226	0.0175	0.029		0.0126	0.0126	0.01	0.0156		0.018125	0.018225	0.008525		2.31	2.32	1.83	2.89		1.44	1.45	1.15	1.79		2.24	2.26	1.75	2.9		1.26	1.26	1	1.56		1.8125	1.8225
330		t_n698		0.0143	0.0144	0.0091	0.0206		0.0095	0.0096	0.0051	0.0147		0.014	0.0142	0.0089	0.0207		0.0086	0.0087	0.0048	0.013		0.0116	0.011725	0.010275		1.43	1.44	0.91	2.06		0.95	0.96	0.51	1.47		1.4	1.42	0.89	2.07		0.86	0.87	0.48	1.3		1.16	1.1725
331		t_n699		0.0059	0.0061	0.0033	0.0097		0.004	0.0041	0.0023	0.0064		0.0059	0.0061	0.0033	0.01		0.0036	0.0037	0.002	0.0057		0.00485	0.005	0.005225		0.59	0.61	0.33	0.97		0.4	0.41	0.23	0.64		0.59	0.61	0.33	1		0.36	0.37	0.2	0.57		0.485	0.5
332		t_n700		0.0049	0.0051	0.0027	0.0085		0.0033	0.0034	0.0018	0.0053		0.0049	0.0051	0.0027	0.0086		0.003	0.003	0.0015	0.0048		0.004025	0.00415	0.004625		0.49	0.51	0.27	0.85		0.33	0.34	0.18	0.53		0.49	0.51	0.27	0.86		0.3	0.3	0.15	0.48		0.4025	0.415
333		t_n701		0.0036	0.0036	0.0019	0.006		0.0025	0.0026	0.0012	0.0044		0.0035	0.0036	0.0018	0.0061		0.0021	0.0022	0.0009	0.0039		0.002925	0.003	0.00365		0.36	0.36	0.19	0.6		0.25	0.26	0.12	0.44		0.35	0.36	0.18	0.61		0.21	0.22	0.09	0.39		0.2925	0.3
334		t_n702		0.021	0.0211	0.0164	0.0266		0.0124	0.0124	0.0096	0.0156		0.0202	0.0204	0.0156	0.0261		0.0107	0.0107	0.0083	0.0134		0.016075	0.01615	0.00795		2.1	2.11	1.64	2.66		1.24	1.24	0.96	1.56		2.02	2.04	1.56	2.61		1.07	1.07	0.83	1.34		1.6075	1.615
335		t_n703		0.0077	0.0079	0.0042	0.0125		0.0066	0.0067	0.0032	0.0107		0.0075	0.0078	0.0043	0.0125		0.0056	0.0057	0.0026	0.0093		0.00685	0.007025	0.007675		0.77	0.79	0.42	1.25		0.66	0.67	0.32	1.07		0.75	0.78	0.43	1.25		0.56	0.57	0.26	0.93		0.685	0.7025
336		t_n704		0.0066	0.0068	0.0032	0.0112		0.005	0.0051	0.0017	0.0094		0.0064	0.0065	0.0031	0.0109		0.0042	0.0043	0.0013	0.0079		0.00555	0.005675	0.007525		0.66	0.68	0.32	1.12		0.5	0.51	0.17	0.94		0.64	0.65	0.31	1.09		0.42	0.43	0.13	0.79		0.555	0.5675
337		t_n705		0.0198	0.02	0.0154	0.0251		0.0107	0.0108	0.0079	0.0139		0.0191	0.0193	0.0147	0.025		0.0092	0.0093	0.0067	0.0122		0.0147	0.01485	0.007875		1.98	2	1.54	2.51		1.07	1.08	0.79	1.39		1.91	1.93	1.47	2.5		0.92	0.93	0.67	1.22		1.47	1.485
338		t_n706		0.014	0.0141	0.0082	0.0208		0.0065	0.0066	0.0028	0.0112		0.0134	0.0135	0.0077	0.0201		0.0058	0.0058	0.0025	0.0097		0.009925	0.01	0.01015		1.4	1.41	0.82	2.08		0.65	0.66	0.28	1.12		1.34	1.35	0.77	2.01		0.58	0.58	0.25	0.97		0.9925	1
339		t_n707		0.0628	0.0628	0.0543	0.0714		0.046	0.046	0.0401	0.0524		0.063	0.063	0.0523	0.0748		0.0405	0.0406	0.0351	0.0465		0.053075	0.0531	0.015825		6.28	6.28	5.43	7.14		4.6	4.6	4.01	5.24		6.3	6.3	5.23	7.48		4.05	4.06	3.51	4.65		5.3075	5.31
340	Rhinopithecus	t_n708		0.0274	0.0278	0.0199	0.0368		0.0258	0.0258	0.0166	0.0344		0.0276	0.0278	0.0194	0.0379		0.02	0.02	0.0127	0.0278		0.0252	0.02535	0.017075		2.74	2.78	1.99	3.68		2.58	2.58	1.66	3.44		2.76	2.78	1.94	3.79		2	2	1.27	2.78		2.52	2.535
341		t_n709		0.0252	0.0253	0.0184	0.0334		0.0226	0.0227	0.0141	0.0316		0.0253	0.0255	0.0181	0.0344		0.0176	0.0175	0.0108	0.0245		0.022675	0.02275	0.015625		2.52	2.53	1.84	3.34		2.26	2.27	1.41	3.16		2.53	2.55	1.81	3.44		1.76	1.75	1.08	2.45		2.2675	2.275
342		t_n710		0.0207	0.0209	0.0142	0.0291		0.0166	0.0168	0.0095	0.0252		0.0206	0.0209	0.0135	0.03		0.0128	0.013	0.0075	0.0196		0.017675	0.0179	0.0148		2.07	2.09	1.42	2.91		1.66	1.68	0.95	2.52		2.06	2.09	1.35	3		1.28	1.3	0.75	1.96		1.7675	1.79
343		t_n711		0.0589	0.059	0.0506	0.0674		0.0439	0.0439	0.0378	0.0502		0.0591	0.0592	0.0487	0.0707		0.0387	0.0388	0.0333	0.0447		0.05015	0.050225	0.01565		5.89	5.9	5.06	6.74		4.39	4.39	3.78	5.02		5.91	5.92	4.87	7.07		3.87	3.88	3.33	4.47		5.015	5.0225
344		t_n712		0.0249	0.0251	0.0133	0.0381		0.0196	0.0199	0.0094	0.0316		0.0246	0.0248	0.0123	0.0387		0.0165	0.0166	0.008	0.0258		0.0214	0.0216	0.0228		2.49	2.51	1.33	3.81		1.96	1.99	0.94	3.16		2.46	2.48	1.23	3.87		1.65	1.66	0.8	2.58		2.14	2.16
345	Pygathrix	t_n713		0.0201	0.0203	0.0123	0.03		0.01	0.0103	0.0063	0.0152		0.0192	0.0195	0.012	0.0283		0.0092	0.0093	0.0059	0.0134		0.014625	0.01485	0.0126		2.01	2.03	1.23	3		1	1.03	0.63	1.52		1.92	1.95	1.2	2.83		0.92	0.93	0.59	1.34		1.4625	1.485
346		t_n714		0.003	0.0031	0.0015	0.0053		0.0031	0.0032	0.0012	0.0057		0.003	0.0032	0.0014	0.0058		0.0028	0.0029	0.0012	0.0051		0.002975	0.0031	0.00415		0.3	0.31	0.15	0.53		0.31	0.32	0.12	0.57		0.3	0.32	0.14	0.58		0.28	0.29	0.12	0.51		0.2975	0.31
347	Presbytis	t_n715		0.0409	0.042	0.0339	0.0554		0.0344	0.0354	0.0279	0.0489		0.0407	0.0418	0.032	0.0573		0.0332	0.0331	0.0214	0.0459		0.0373	0.038075	0.023075		4.09	4.2	3.39	5.54		3.44	3.54	2.79	4.89		4.07	4.18	3.2	5.73		3.32	3.31	2.14	4.59		3.73	3.8075
348		t_n716		0.0146	0.0148	0.0102	0.0205		0.018	0.0184	0.011	0.0288		0.0145	0.0148	0.0096	0.0212		0.0157	0.016	0.0097	0.0241		0.0157	0.016	0.013525		1.46	1.48	1.02	2.05		1.8	1.84	1.1	2.88		1.45	1.48	0.96	2.12		1.57	1.6	0.97	2.41		1.57	1.6
349		t_n717		0.0082	0.0084	0.0039	0.0137		0.0097	0.0101	0.0035	0.0191		0.0085	0.0088	0.004	0.0151		0.0084	0.0088	0.0029	0.0173		0.0087	0.009025	0.012725		0.82	0.84	0.39	1.37		0.97	1.01	0.35	1.91		0.85	0.88	0.4	1.51		0.84	0.88	0.29	1.73		0.87	0.9025
350		t_n718		0.011	0.0112	0.0081	0.015		0.0099	0.01	0.007	0.0135		0.0111	0.0112	0.0074	0.0159		0.0088	0.0089	0.0063	0.012		0.0102	0.010325	0.0069		1.1	1.12	0.81	1.5		0.99	1	0.7	1.35		1.11	1.12	0.74	1.59		0.88	0.89	0.63	1.2		1.02	1.0325
351		t_n719		0.0093	0.0095	0.0064	0.0135		0.0082	0.0083	0.0052	0.012		0.0093	0.0094	0.0058	0.0138		0.0073	0.0074	0.0046	0.0106		0.008525	0.00865	0.006975		0.93	0.95	0.64	1.35		0.82	0.83	0.52	1.2		0.93	0.94	0.58	1.38		0.73	0.74	0.46	1.06		0.8525	0.865
352		t_n720		0.008	0.0081	0.0054	0.0117		0.0068	0.007	0.0039	0.0107		0.008	0.0081	0.0049	0.0123		0.006	0.0061	0.0032	0.0094		0.0072	0.007325	0.006675		0.8	0.81	0.54	1.17		0.68	0.7	0.39	1.07		0.8	0.81	0.49	1.23		0.6	0.61	0.32	0.94		0.72	0.7325
353		t_n721		0.0069	0.007	0.0042	0.0102		0.0053	0.0055	0.0025	0.0092		0.0068	0.0069	0.0039	0.0109		0.0047	0.0048	0.0021	0.0082		0.005925	0.00605	0.00645		0.69	0.7	0.42	1.02		0.53	0.55	0.25	0.92		0.68	0.69	0.39	1.09		0.47	0.48	0.21	0.82		0.5925	0.605
354		t_n722		0.0095	0.0096	0.0062	0.0135		0.0081	0.0081	0.0042	0.0122		0.0095	0.0096	0.0057	0.0141		0.0072	0.0073	0.0041	0.0108		0.008575	0.00865	0.0076		0.95	0.96	0.62	1.35		0.81	0.81	0.42	1.22		0.95	0.96	0.57	1.41		0.72	0.73	0.41	1.08		0.8575	0.865
355		t_n723		0.0049	0.0049	0.0023	0.008		0.005	0.0053	0.0017	0.0096		0.005	0.0052	0.0024	0.0088		0.0044	0.0046	0.0017	0.0085		0.004825	0.005	0.0067		0.49	0.49	0.23	0.8		0.5	0.53	0.17	0.96		0.5	0.52	0.24	0.88		0.44	0.46	0.17	0.85		0.4825	0.5
356		t_n724		0.0394	0.0403	0.0326	0.0534		0.0327	0.0329	0.0256	0.0452		0.0391	0.04	0.0306	0.0544		0.029	0.0299	0.0191	0.0438		0.03505	0.035775	0.022225		3.94	4.03	3.26	5.34		3.27	3.29	2.56	4.52		3.91	4	3.06	5.44		2.9	2.99	1.91	4.38		3.505	3.5775
357		t_n725		0.0343	0.0348	0.026	0.0489		0.0279	0.0276	0.0187	0.0351		0.0335	0.0342	0.0246	0.0482		0.0221	0.0234	0.0134	0.0381		0.02945	0.03	0.0219		3.43	3.48	2.6	4.89		2.79	2.76	1.87	3.51		3.35	3.42	2.46	4.82		2.21	2.34	1.34	3.81		2.945	3
358		t_n726		0.0298	0.0298	0.0195	0.0398		0.0215	0.0214	0.011	0.0314		0.0288	0.029	0.0187	0.0402		0.017	0.0175	0.0083	0.0315		0.024275	0.024425	0.02135		2.98	2.98	1.95	3.98		2.15	2.14	1.1	3.14		2.88	2.9	1.87	4.02		1.7	1.75	0.83	3.15		2.4275	2.4425
359		t_n727		0.0354	0.036	0.026	0.0504		0.0271	0.0267	0.0161	0.0348		0.0347	0.0354	0.0243	0.0502		0.0217	0.0231	0.0128	0.0391		0.029725	0.0303	0.023825		3.54	3.6	2.6	5.04		2.71	2.67	1.61	3.48		3.47	3.54	2.43	5.02		2.17	2.31	1.28	3.91		2.9725	3.03
360	Colobini	t_n728		0.0793	0.0795	0.07	0.0902		0.0593	0.0598	0.0531	0.0692		0.0799	0.0802	0.0667	0.0946		0.0535	0.0538	0.0468	0.0625		0.068	0.068325	0.019975		7.93	7.95	7	9.02		5.93	5.98	5.31	6.92		7.99	8.02	6.67	9.46		5.35	5.38	4.68	6.25		6.8	6.8325
361		t_n729		0.0711	0.0712	0.0606	0.0819		0.0529	0.0525	0.0421	0.0614		0.0717	0.0719	0.0584	0.0861		0.0471	0.047	0.037	0.0564		0.0607	0.06065	0.021925		7.11	7.12	6.06	8.19		5.29	5.25	4.21	6.14		7.17	7.19	5.84	8.61		4.71	4.7	3.7	5.64		6.07	6.065
362	Piliocolobus	t_n730		0.0363	0.0365	0.0278	0.046		0.0333	0.0333	0.0255	0.0437		0.0362	0.0363	0.0272	0.0466		0.0295	0.0301	0.0197	0.0429		0.033825	0.03405	0.01975		3.63	3.65	2.78	4.6		3.33	3.33	2.55	4.37		3.62	3.63	2.72	4.66		2.95	3.01	1.97	4.29		3.3825	3.405
363		t_n731		0.0327	0.0328	0.0249	0.0412		0.0297	0.0295	0.022	0.0368		0.0326	0.0327	0.0242	0.0419		0.0248	0.0259	0.0172	0.038		0.02995	0.030225	0.0174		3.27	3.28	2.49	4.12		2.97	2.95	2.2	3.68		3.26	3.27	2.42	4.19		2.48	2.59	1.72	3.8		2.995	3.0225
364		t_n732		0.016	0.0163	0.0102	0.0239		0.0194	0.0196	0.0121	0.0284		0.0157	0.0161	0.0102	0.0241		0.0163	0.0167	0.0097	0.0261		0.01685	0.017175	0.015075		1.6	1.63	1.02	2.39		1.94	1.96	1.21	2.84		1.57	1.61	1.02	2.41		1.63	1.67	0.97	2.61		1.685	1.7175
365		t_n733		0.0088	0.009	0.0056	0.0135		0.0116	0.0119	0.0061	0.0197		0.0088	0.009	0.0056	0.0143		0.0096	0.0099	0.0045	0.0173		0.0097	0.00995	0.01075		0.88	0.9	0.56	1.35		1.16	1.19	0.61	1.97		0.88	0.9	0.56	1.43		0.96	0.99	0.45	1.73		0.97	0.995
366		t_n734		0.0066	0.0068	0.0034	0.0109		0.0081	0.0085	0.0035	0.0157		0.0064	0.0066	0.0035	0.0114		0.0065	0.0069	0.0022	0.0139		0.0069	0.0072	0.009825		0.66	0.68	0.34	1.09		0.81	0.85	0.35	1.57		0.64	0.66	0.35	1.14		0.65	0.69	0.22	1.39		0.69	0.72
367		t_n735		0.0077	0.0079	0.0036	0.013		0.0094	0.0099	0.0033	0.0194		0.0077	0.0079	0.0037	0.0137		0.0077	0.0082	0.0022	0.0166		0.008125	0.008475	0.012475		0.77	0.79	0.36	1.3		0.94	0.99	0.33	1.94		0.77	0.79	0.37	1.37		0.77	0.82	0.22	1.66		0.8125	0.8475
368		t_n736		0.026	0.0261	0.0172	0.0358		0.023	0.0228	0.0127	0.0318		0.0258	0.0258	0.0165	0.0357		0.0183	0.0186	0.0093	0.0312		0.023275	0.023325	0.0197		2.6	2.61	1.72	3.58		2.3	2.28	1.27	3.18		2.58	2.58	1.65	3.57		1.83	1.86	0.93	3.12		2.3275	2.3325
369		t_n737		0.0039	0.0042	0.0014	0.0085		0.0041	0.0046	0.0013	0.0113		0.0041	0.0044	0.0014	0.0091		0.0032	0.0038	0.001	0.01		0.003825	0.00425	0.00845		0.39	0.42	0.14	0.85		0.41	0.46	0.13	1.13		0.41	0.44	0.14	0.91		0.32	0.38	0.1	1		0.3825	0.425
370	Colobus	t_n738		0.0428	0.0435	0.0322	0.0584		0.0321	0.0324	0.0236	0.0455		0.0438	0.0445	0.0314	0.0613		0.0305	0.0313	0.0199	0.0461		0.0373	0.037925	0.02605		4.28	4.35	3.22	5.84		3.21	3.24	2.36	4.55		4.38	4.45	3.14	6.13		3.05	3.13	1.99	4.61		3.73	3.7925
371		t_n739		0.026	0.0262	0.0204	0.0327		0.0205	0.0206	0.0158	0.0262		0.0263	0.0265	0.0201	0.0341		0.0179	0.018	0.0138	0.0227		0.022675	0.022825	0.0114		2.6	2.62	2.04	3.27		2.05	2.06	1.58	2.62		2.63	2.65	2.01	3.41		1.79	1.8	1.38	2.27		2.2675	2.2825
372		t_n740		0.0167	0.0169	0.0118	0.023		0.0153	0.0155	0.011	0.0206		0.0174	0.0176	0.012	0.0242		0.0136	0.0137	0.0099	0.018		0.01575	0.015925	0.010275		1.67	1.69	1.18	2.3		1.53	1.55	1.1	2.06		1.74	1.76	1.2	2.42		1.36	1.37	0.99	1.8		1.575	1.5925
373		t_n741		0.0016	0.0017	0.0006	0.0036		0.0028	0.0033	0.0007	0.0089		0.0016	0.0018	0.0005	0.004		0.0025	0.003	0.0007	0.0075		0.002125	0.00245	0.005375		0.16	0.17	0.06	0.36		0.28	0.33	0.07	0.89		0.16	0.18	0.05	0.4		0.25	0.3	0.07	0.75		0.2125	0.245
374		t_n742		0.647	0.6498	0.6113	0.699		0.8493	0.851	0.7691	0.9416		0.6888	0.6915	0.6283	0.7676		0.8307	0.83	0.7429	0.9185		0.75395	0.755575	0.143775		64.7	64.98	61.13	69.9		84.93	85.1	76.91	94.16		68.88	69.15	62.83	76.76		83.07	83	74.29	91.85		75.395	75.5575
375		t_n743		0.0705	0.0763	0.0305	0.165		0.1273	0.1255	0.0941	0.1572		0.0704	0.0766	0.0341	0.1706		0.1147	0.1135	0.0858	0.1397		0.095725	0.097975	0.097		7.05	7.63	3.05	16.5		12.73	12.55	9.41	15.72		7.04	7.66	3.41	17.06		11.47	11.35	8.58	13.97		9.5725	9.7975
[truncated: 3 more columns]

## Sheet: Raw Data
1	Constrained		1		MCMCTree			1		MCMCTree			1			MCMCTree			1		MCMCTree			1		MCMCTree			1			MCMCTree			1		MCMCTree			1		MCMCTree			1			MCMCTree
2	Nodes	MCMC Node		Hard	Autocorrelated	Run 1			Hard	Autocorrelated	Run 2			Hard		Autocorrelated	(AVERAGES)			Hard	Independent Rates	Run 1			Hard	Independent Rates	Run 2			Hard		Independent Rates	(AVERAGES)			Soft	Autocorrelated	Run 1			Soft	Autocorrelated	Run 2			Soft		Autocorrelated	(AVERAGES)
3		Number		Point	Estimate	Confidence	Interval		Point	Estimate	Confidence	Interval		Point	Estimate			Avg. CI		Point	Estimate	Confidence	Interval		Point	Estimate	Confidence	Interval		Point	Estimate			Avg. CI		Point	Estimate	Confidence	Interval		Point	Estimate	Confidence	Interval		Point	Estimate
4				Median	Mean	Minimum	Maximum		Median	Mean	Minimum	Maximum		Median	Mean	Minimum	Maximum	Width		Median	Mean	Minimum	Maximum		Median	Mean	Minimum	Maximum		Median	Mean	Minimum	Maximum	Width		Median	Mean	Minimum	Maximum		Median	Mean	Minimum	Maximum		Median	Mean	Minimum	Maximum
5	5	t_n350		0.7463	0.7492	0.741	0.7788		0.7464	0.7484	0.741	0.7666		0.74635	0.7488	0.741	0.7727	0.0317		0.8669	0.8691	0.803	0.95		0.8648	0.8671	0.802	0.9457		0.86585	0.8681	0.8025	0.94785	0.14535		0.7495	0.7529	0.7249	0.7945		0.7516	0.7549	0.7275	0.798		0.75055	0.7539	0.7262	0.79625
6		t_n351		0.7034	0.7039	0.6825	0.7268		0.7029	0.7039	0.6827	0.7302		0.70315	0.7039	0.6826	0.7285	0.0459		0.8006	0.802	0.7488	0.861		0.797	0.8001	0.7491	0.8657		0.7988	0.80105	0.74895	0.86335	0.1144		0.7349	0.7364	0.7039	0.7756		0.7361	0.7371	0.7035	0.777		0.7355	0.73675	0.7037	0.7763
7		t_n352		0.1184	0.1299	0.0484	0.2778		0.1194	0.1278	0.0537	0.2569		0.1189	0.12885	0.05105	0.26735	0.2163		0.1299	0.1297	0.0981	0.1653		0.1298	0.1294	0.0989	0.1622		0.12985	0.12955	0.0985	0.16375	0.06525		0.0825	0.0979	0.0407	0.2079		0.0852	0.0981	0.044	0.2116		0.08385	0.098	0.04235	0.20975
8		t_n353		0.6629	0.663	0.6439	0.6842		0.6626	0.6632	0.6441	0.6866		0.66275	0.6631	0.644	0.6854	0.0414		0.7029	0.7042	0.6663	0.7483		0.7015	0.7029	0.6663	0.7453		0.7022	0.70355	0.6663	0.7468	0.0805		0.6956	0.6965	0.6652	0.7342		0.697	0.6976	0.6644	0.7351		0.6963	0.69705	0.6648	0.73465
9	9	t_n354		0.547	0.5457	0.5226	0.5592		0.5486	0.5462	0.5225	0.5595		0.5478	0.54595	0.52255	0.55935	0.0368		0.5544	0.5525	0.535	0.5597		0.5546	0.5529	0.5368	0.5598		0.5545	0.5527	0.5359	0.55975	0.02385		0.5523	0.5501	0.5189	0.5717		0.5509	0.5484	0.5162	0.57		0.5516	0.54925	0.51755	0.57085
10	10	t_n355		0.3727	0.3735	0.3711	0.3803		0.3729	0.3738	0.3711	0.3818		0.3728	0.37365	0.3711	0.38105	0.00995		0.3734	0.3744	0.3711	0.3827		0.3736	0.3745	0.3711	0.3838		0.3735	0.37445	0.3711	0.38325	0.01215		0.3334	0.3331	0.3041	0.3596		0.3324	0.3321	0.2944	0.3656		0.3329	0.3326	0.29925	0.3626
11		t_n356		0.2492	0.2482	0.202	0.2907		0.2506	0.2501	0.2043	0.2915		0.2499	0.24915	0.20315	0.2911	0.08795		0.2412	0.2477	0.1938	0.3171		0.2492	0.2523	0.1948	0.319		0.2452	0.25	0.1943	0.31805	0.12375		0.2275	0.2287	0.1985	0.2648		0.2267	0.2274	0.1923	0.2652		0.2271	0.22805	0.1954	0.265
12		t_n357		0.1997	0.1994	0.1621	0.2339		0.1998	0.2002	0.1638	0.2345		0.19975	0.1998	0.16295	0.2342	0.07125		0.1424	0.1438	0.1238	0.17		0.1429	0.1446	0.1247	0.1714		0.14265	0.1442	0.12425	0.1707	0.04645		0.1744	0.1749	0.1476	0.2065		0.1744	0.1745	0.1449	0.2071		0.1744	0.1747	0.14625	0.2068
13		t_n358		0.155	0.155	0.1234	0.1913		0.1554	0.1556	0.1247	0.1919		0.1552	0.1553	0.12405	0.1916	0.06755		0.1145	0.1151	0.0973	0.1357		0.115	0.1157	0.0983	0.137		0.11475	0.1154	0.0978	0.13635	0.03855		0.1356	0.1362	0.1158	0.1598		0.1357	0.1363	0.1147	0.1621		0.13565	0.13625	0.11525	0.16095
14		t_n359		0.0671	0.0675	0.0344	0.1119		0.066	0.0659	0.0343	0.1075		0.06655	0.0667	0.03435	0.1097	0.07535		0.0279	0.0281	0.0164	0.0454		0.0278	0.0284	0.0163	0.0485		0.02785	0.02825	0.01635	0.04695	0.0306		0.054	0.0547	0.0284	0.085		0.0562	0.0571	0.03	0.0893		0.0551	0.0559	0.0292	0.08715
15		t_n360		0.0095	0.0097	0.0052	0.0153		0.0095	0.0097	0.0053	0.0152		0.0095	0.0097	0.00525	0.01525	0.01		0.0086	0.0088	0.0052	0.0131		0.0087	0.0088	0.0053	0.0129		0.00865	0.0088	0.00525	0.013	0.00775		0.0078	0.008	0.0046	0.0125		0.0078	0.0081	0.0045	0.0125		0.0078	0.00805	0.00455	0.0125
16		t_n361		0.0079	0.0079	0.0007	0.0137		0.0079	0.008	0.0033	0.0137		0.0079	0.00795	0.002	0.0137	0.0117		0.0071	0.0072	0.0034	0.0117		0.007	0.0071	0.0031	0.0115		0.00705	0.00715	0.00325	0.0116	0.00835		0.0064	0.0065	0.0025	0.0114		0.0065	0.0066	0.0029	0.0114		0.00645	0.00655	0.0027	0.0114
17		t_n362		0.147	0.1472	0.1118	0.1877		0.147	0.1475	0.1123	0.1894		0.147	0.14735	0.11205	0.18855	0.0765		0.0922	0.0915	0.0597	0.1205		0.0911	0.0907	0.0582	0.1209		0.09165	0.0911	0.05895	0.1207	0.06175		0.1276	0.1283	0.105	0.1549		0.128	0.1287	0.105	0.1562		0.1278	0.1285	0.105	0.15555
18		t_n363		0.0292	0.0316	0.0083	0.0718		0.0283	0.03	0.0084	0.0685		0.02875	0.0308	0.00835	0.07015	0.0618		0.0132	0.0145	0.0043	0.0318		0.0134	0.0147	0.0035	0.0325		0.0133	0.0146	0.0039	0.03215	0.02825		0.0303	0.0316	0.0104	0.0684		0.031	0.0316	0.006	0.0674		0.03065	0.0316	0.0082	0.0679
19		t_n364		0.1019	0.1016	0.0702	0.1415		0.1011	0.1009	0.0697	0.1404		0.1015	0.10125	0.06995	0.14095	0.071		0.0589	0.0623	0.0423	0.0909		0.0588	0.062	0.0433	0.0921		0.05885	0.06215	0.0428	0.0915	0.0487		0.0833	0.0865	0.0697	0.1179		0.0853	0.0869	0.0705	0.1145		0.0843	0.0867	0.0701	0.1162
20		t_n365		0.098	0.098	0.0672	0.138		0.0973	0.0972	0.0668	0.1368		0.09765	0.0976	0.067	0.1374	0.0704		0.0489	0.0482	0.0296	0.0726		0.0479	0.0473	0.0292	0.0706		0.0484	0.04775	0.0294	0.0716	0.0422		0.0807	0.0834	0.0664	0.1144		0.0826	0.0838	0.0672	0.1111		0.08165	0.0836	0.0668	0.11275
21		t_n366		0.0239	0.0247	0.0141	0.0385		0.024	0.0246	0.0141	0.0379		0.02395	0.02465	0.0141	0.0382	0.0241		0.0315	0.0316	0.0232	0.0428		0.0314	0.0315	0.0231	0.0432		0.03145	0.03155	0.02315	0.043	0.01985		0.0235	0.024	0.0146	0.0358		0.0233	0.0237	0.0144	0.0352		0.0234	0.02385	0.0145	0.0355
22		t_n367		0.0049	0.0074	0.0003	0.0253		0.0041	0.0067	0.0002	0.0265		0.0045	0.00705	0.00025	0.0259	0.02565		0.0017	0.003	0.0001	0.0129		0.0029	0.0044	0.0002	0.017		0.0023	0.0037	0.00015	0.01495	0.0148		0.0031	0.0048	0.0004	0.0186		0.003	0.0043	0.0002	0.0171		0.00305	0.00455	0.0003	0.01785
23		t_n368		0.0277	0.0288	0.0044	0.0638		0.0288	0.0307	0.0048	0.071		0.02825	0.02975	0.0046	0.0674	0.0628		0.0147	0.0205	0.0008	0.0697		0.0235	0.0261	0.0032	0.0751		0.0191	0.0233	0.002	0.0724	0.0704		0.0315	0.0322	0.0056	0.0671		0.0287	0.0297	0.0047	0.0671		0.0301	0.03095	0.00515	0.0671
24		t_n369		0.345	0.3446	0.33	0.3569		0.3461	0.346	0.3322	0.3592		0.34555	0.3453	0.3311	0.35805	0.02695		0.3503	0.3498	0.3337	0.364		0.3504	0.3499	0.3341	0.3642		0.35035	0.34985	0.3339	0.3641	0.0302		0.3072	0.3072	0.278	0.3335		0.3065	0.3062	0.2695	0.3396		0.30685	0.3067	0.27375	0.33655
25		t_n370		0.294	0.2927	0.264	0.3135		0.2949	0.2939	0.2655	0.3158		0.29445	0.2933	0.26475	0.31465	0.0499		0.2038	0.2033	0.1674	0.2361		0.2051	0.2046	0.1684	0.2365		0.20445	0.20395	0.1679	0.2363	0.0684		0.2448	0.244	0.2067	0.2796		0.2439	0.2436	0.2011	0.2867		0.24435	0.2438	0.2039	0.28315
26		t_n371		0.2621	0.2597	0.2136	0.2933		0.2641	0.263	0.2237	0.2966		0.2631	0.26135	0.21865	0.29495	0.0763		0.1893	0.1881	0.1517	0.2207		0.1906	0.1892	0.1509	0.2212		0.18995	0.18865	0.1513	0.22095	0.06965		0.2182	0.2174	0.1788	0.2507		0.2141	0.2145	0.1734	0.2615		0.21615	0.21595	0.1761	0.2561
27		t_n372		0.0208	0.0222	0.005	0.0517		0.0204	0.0219	0.0049	0.0468		0.0206	0.02205	0.00495	0.04925	0.0443		0.01	0.0125	0.0005	0.0346		0.0119	0.0141	0.002	0.0359		0.01095	0.0133	0.00125	0.03525	0.034		0.0191	0.0205	0.0052	0.0424		0.0224	0.0235	0.0073	0.0443		0.02075	0.022	0.00625	0.04335
28		t_n373		0.0554	0.0558	0.0396	0.0728		0.0595	0.06	0.0454	0.0768		0.05745	0.0579	0.0425	0.0748	0.0323		0.0544	0.0541	0.0429	0.0655		0.0547	0.0543	0.0434	0.0654		0.05455	0.0542	0.04315	0.06545	0.0223		0.0516	0.0516	0.0374	0.067		0.0511	0.0511	0.0376	0.0663		0.05135	0.05135	0.0375	0.06665
29		t_n374		0.0301	0.0301	0.0182	0.0426		0.0316	0.0314	0.0178	0.0462		0.03085	0.03075	0.018	0.0444	0.0264		0.0228	0.0229	0.0098	0.0357		0.0214	0.022	0.0099	0.0349		0.0221	0.02245	0.00985	0.0353	0.02545		0.028	0.0282	0.0171	0.0411		0.0268	0.0273	0.0166	0.0405		0.0274	0.02775	0.01685	0.0408
30		t_n375		0.0015	0.0015	0.0005	0.0029		0.0015	0.0016	0.0006	0.0031		0.0015	0.00155	0.00055	0.003	0.00245		0.0038	0.004	0.0018	0.0068		0.0038	0.004	0.0016	0.0072		0.0038	0.004	0.0017	0.007	0.0053		0.0015	0.0015	0.0006	0.003		0.0014	0.0015	0.0006	0.003		0.00145	0.0015	0.0006	0.003
31		t_n376		0.001	0.001	0.0001	0.0025		0.001	0.0011	0.0002	0.0026		0.001	0.00105	0.00015	0.00255	0.0024		0.0032	0.0033	0.0011	0.0063		0.0032	0.0034	0.001	0.0068		0.0032	0.00335	0.00105	0.00655	0.0055		0.0011	0.0012	0.0001	0.0026		0.001	0.0011	0.0002	0.0025		0.00105	0.00115	0.00015	0.00255
32		t_n377		0.5172	0.5162	0.493	0.5338		0.5184	0.5171	0.4943	0.5351		0.5178	0.51665	0.49365	0.53445	0.0408		0.4973	0.4963	0.466	0.5209		0.4976	0.4965	0.4673	0.5203		0.49745	0.4964	0.46665	0.5206	0.05395		0.5194	0.5179	0.4858	0.5435		0.5177	0.5164	0.484	0.5416		0.51855	0.51715	0.4849	0.54255
33		t_n378		0.3376	0.3368	0.3076	0.3616		0.3358	0.3364	0.3061	0.3662		0.3367	0.3366	0.30685	0.3639	0.05705		0.3179	0.3174	0.2909	0.3429		0.3214	0.3216	0.2934	0.349		0.31965	0.3195	0.29215	0.34595	0.0538		0.3264	0.3266	0.3006	0.3525		0.3272	0.3266	0.2954	0.3551		0.3268	0.3266	0.298	0.3538
34		t_n379		0.2288	0.2284	0.196	0.2582		0.2302	0.2316	0.1995	0.2692		0.2295	0.23	0.19775	0.2637	0.06595		0.1995	0.199	0.17	0.2259		0.2003	0.1998	0.1678	0.2294		0.1999	0.1994	0.1689	0.22765	0.05875		0.2208	0.2215	0.1991	0.2474		0.2224	0.2232	0.1971	0.2526		0.2216	0.22235	0.1981	0.25
35		t_n380		0.0082	0.0087	0.004	0.0165		0.0079	0.0083	0.0032	0.0158		0.00805	0.0085	0.0036	0.01615	0.01255		0.0061	0.0063	0.0031	0.0102		0.0062	0.0064	0.0033	0.0105		0.00615	0.00635	0.0032	0.01035	0.00715		0.0079	0.0084	0.0039	0.0157		0.0078	0.0083	0.0039	0.015		0.00785	0.00835	0.0039	0.01535
36		t_n381		0.1974	0.197	0.1676	0.2243		0.1977	0.1999	0.171	0.2342		0.19755	0.19845	0.1693	0.22925	0.05995		0.1717	0.1712	0.1415	0.1982		0.1722	0.1721	0.1422	0.201		0.17195	0.17165	0.14185	0.1996	0.05775		0.1898	0.1906	0.1692	0.2157		0.1912	0.1919	0.167	0.2198		0.1905	0.19125	0.1681	0.21775
37		t_n382		0.0703	0.0698	0.05	0.0914		0.0713	0.0709	0.0475	0.0964		0.0708	0.07035	0.04875	0.0939	0.04515		0.0546	0.0543	0.046	0.0621		0.0546	0.0544	0.0456	0.0628		0.0546	0.05435	0.0458	0.06245	0.01665		0.0677	0.067	0.0492	0.084		0.0661	0.0671	0.0494	0.0892		0.0669	0.06705	0.0493	0.0866
38		t_n383		0.0606	0.0603	0.0437	0.0776		0.0615	0.0612	0.0416	0.0819		0.06105	0.06075	0.04265	0.07975	0.0371		0.0371	0.0373	0.0325	0.0438		0.0373	0.0374	0.0327	0.0442		0.0372	0.03735	0.0326	0.044	0.0114		0.0582	0.0572	0.0431	0.0717		0.0565	0.0574	0.0428	0.0759		0.05735	0.0573	0.04295	0.0738
39		t_n384		0.0525	0.0521	0.0354	0.0697		0.0531	0.0529	0.033	0.0744		0.0528	0.0525	0.0342	0.07205	0.03785		0.0324	0.0324	0.0275	0.0378		0.0325	0.0326	0.0278	0.0388		0.03245	0.0325	0.02765	0.0383	0.01065		0.0501	0.0493	0.0348	0.0644		0.0484	0.0495	0.035	0.0685		0.04925	0.0494	0.0349	0.06645
40		t_n385		0.026	0.0261	0.0182	0.0347		0.0264	0.0264	0.0174	0.0361		0.0262	0.02625	0.0178	0.0354	0.0176		0.0175	0.0176	0.0136	0.0219		0.0174	0.0175	0.0136	0.022		0.01745	0.01755	0.0136	0.02195	0.00835		0.0249	0.0248	0.0179	0.032		0.0244	0.0249	0.0182	0.0339		0.02465	0.02485	0.01805	0.03295
41		t_n386		0.0123	0.0124	0.0076	0.0183		0.0123	0.0126	0.0074	0.0191		0.0123	0.0125	0.0075	0.0187	0.0112		0.0094	0.0096	0.0056	0.0144		0.0094	0.0095	0.0055	0.0144		0.0094	0.00955	0.00555	0.0144	0.00885		0.0117	0.0118	0.0076	0.0168		0.0114	0.0118	0.0075	0.0177		0.01155	0.0118	0.00755	0.01725
42		t_n387		0.0104	0.0104	0.0062	0.0155		0.0103	0.0105	0.0062	0.016		0.01035	0.01045	0.0062	0.01575	0.00955		0.0061	0.0062	0.0028	0.0103		0.006	0.0061	0.0027	0.0104		0.00605	0.00615	0.00275	0.01035	0.0076		0.0097	0.0099	0.0062	0.0144		0.0095	0.0098	0.006	0.0147		0.0096	0.00985	0.0061	0.01455
43		t_n388		0.0236	0.0236	0.0157	0.0321		0.024	0.024	0.0152	0.0335		0.0238	0.0238	0.01545	0.0328	0.01735		0.0154	0.0155	0.0117	0.0198		0.0154	0.0154	0.0114	0.0199		0.0154	0.01545	0.01155	0.01985	0.0083		0.0225	0.0224	0.0154	0.0296		0.022	0.0226	0.016	0.0312		0.02225	0.0225	0.0157	0.0304
44		t_n389		0.0161	0.0165	0.0076	0.0277		0.0168	0.017	0.0076	0.0282		0.01645	0.01675	0.0076	0.02795	0.02035		0.01	0.0099	0.0041	0.0163		0.0099	0.01	0.0044	0.0162		0.00995	0.00995	0.00425	0.01625	0.012		0.0152	0.0155	0.0072	0.0255		0.0154	0.0159	0.0078	0.0267		0.0153	0.0157	0.0075	0.0261
45		t_n390		0.0087	0.009	0.0045	0.0152		0.009	0.0094	0.0047	0.0161		0.00885	0.0092	0.0046	0.01565	0.01105		0.0051	0.0054	0.0019	0.0106		0.0054	0.0056	0.0021	0.0108		0.00525	0.0055	0.002	0.0107	0.0087		0.0084	0.0088	0.0047	0.0147		0.0084	0.0088	0.0046	0.0146		0.0084	0.0088	0.00465	0.01465
46		t_n391		0.0524	0.0521	0.0356	0.0694		0.0531	0.053	0.0337	0.0745		0.05275	0.05255	0.03465	0.07195	0.0373		0.0331	0.0331	0.0281	0.0397		0.0332	0.0332	0.0282	0.0401		0.03315	0.03315	0.02815	0.0399	0.01175		0.0502	0.0494	0.0353	0.0646		0.0486	0.0496	0.0351	0.0683		0.0494	0.0495	0.0352	0.06645
47		t_n392		0.0118	0.012	0.0062	0.0188		0.0122	0.0124	0.0065	0.0192		0.012	0.0122	0.00635	0.019	0.01265		0.0065	0.0066	0.0036	0.0106		0.0066	0.0067	0.0034	0.0109		0.00655	0.00665	0.0035	0.01075	0.00725		0.0113	0.0114	0.006	0.0176		0.0112	0.0113	0.0057	0.0177		0.01125	0.01135	0.00585	0.01765
48		t_n393		0.0837	0.0867	0.0681	0.1155		0.0877	0.0897	0.068	0.1203		0.0857	0.0882	0.06805	0.1179	0.04985		0.0609	0.0623	0.0518	0.0784		0.0612	0.0624	0.0521	0.0783		0.06105	0.06235	0.05195	0.07835	0.0264		0.081	0.0819	0.0686	0.1039		0.083	0.0834	0.0692	0.0998		0.082	0.08265	0.0689	0.10185
49		t_n394		0.0765	0.0791	0.0611	0.106		0.0791	0.0817	0.0608	0.1111		0.0778	0.0804	0.06095	0.10855	0.0476		0.0532	0.0529	0.0394	0.0687		0.0533	0.0529	0.0387	0.0676		0.05325	0.0529	0.03905	0.06815	0.0291		0.0742	0.0747	0.0612	0.0944		0.076	0.0762	0.0623	0.0913		0.0751	0.07545	0.06175	0.09285
50		t_n395		0.043	0.0463	0.029	0.0748		0.0475	0.0492	0.0297	0.0767		0.04525	0.04775	0.02935	0.07575	0.0464		0.0299	0.03	0.0185	0.0452		0.0299	0.0299	0.0176	0.0448		0.0299	0.02995	0.01805	0.045	0.02695		0.0405	0.0424	0.0297	0.0634		0.0425	0.0438	0.0299	0.0623		0.0415	0.0431	0.0298	0.06285
51		t_n396		0.0087	0.0088	0.0053	0.0134		0.0087	0.0089	0.0054	0.0138		0.0087	0.00885	0.00535	0.0136	0.00825		0.0071	0.0073	0.0044	0.0108		0.0071	0.0072	0.0043	0.0107		0.0071	0.00725	0.00435	0.01075	0.0064		0.0083	0.0084	0.0052	0.0123		0.0083	0.0085	0.0052	0.0127		0.0083	0.00845	0.0052	0.0125
52		t_n397		0.002	0.0023	0.0007	0.0051		0.0021	0.0024	0.0008	0.0055		0.00205	0.00235	0.00075	0.0053	0.00455		0.0028	0.003	0.0009	0.0066		0.0029	0.003	0.0009	0.0061		0.00285	0.003	0.0009	0.00635	0.00545		0.0018	0.002	0.0008	0.0041		0.002	0.0021	0.0008	0.0042		0.0019	0.00205	0.0008	0.00415
53		t_n398		0.327	0.3263	0.2971	0.3506		0.3253	0.3259	0.2964	0.3547		0.32615	0.3261	0.29675	0.35265	0.0559		0.3052	0.3048	0.2789	0.3298		0.3089	0.3089	0.2817	0.3356		0.30705	0.30685	0.2803	0.3327	0.0524		0.3159	0.3161	0.2907	0.3418		0.3165	0.3159	0.2857	0.3438		0.3162	0.316	0.2882	0.3428
54		t_n399		0.2948	0.2941	0.2642	0.3202		0.2935	0.2938	0.2632	0.3253		0.29415	0.29395	0.2637	0.32275	0.05905		0.2734	0.2733	0.2478	0.2988		0.2771	0.277	0.2506	0.303		0.27525	0.27515	0.2492	0.3009	0.0517		0.284	0.2843	0.2571	0.3111		0.2851	0.2846	0.2535	0.3136		0.28455	0.28445	0.2553	0.31235
55		t_n400		0.2754	0.2746	0.2394	0.3056		0.2744	0.2746	0.238	0.3105		0.2749	0.2746	0.2387	0.30805	0.06935		0.243	0.2438	0.209	0.2812		0.2484	0.2485	0.2124	0.2875		0.2457	0.24615	0.2107	0.28435	0.07365		0.263	0.2634	0.2325	0.2962		0.2643	0.2642	0.2294	0.2992		0.26365	0.2638	0.23095	0.2977
56		t_n401		0.2256	0.2255	0.1975	0.2537		0.2256	0.226	0.1945	0.2598		0.2256	0.22575	0.196	0.25675	0.06075		0.2075	0.2079	0.1848	0.2323		0.2101	0.2104	0.1882	0.2346		0.2088	0.20915	0.1865	0.23345	0.04695		0.2187	0.2188	0.1916	0.2454		0.2195	0.2197	0.1893	0.2497		0.2191	0.21925	0.19045	0.24755
57		t_n402		0.1337	0.1347	0.0804	0.1896		0.134	0.1351	0.0919	0.1836		0.13385	0.1349	0.08615	0.1866	0.10045		0.0861	0.0872	0.0554	0.1266		0.0877	0.0891	0.0546	0.1336		0.0869	0.08815	0.055	0.1301	0.0751		0.1292	0.1288	0.0807	0.1769		0.1244	0.1244	0.0781	0.1777		0.1268	0.1266	0.0794	0.1773
58		t_n403		0.1059	0.1064	0.0661	0.1518		0.106	0.1068	0.0704	0.1484		0.10595	0.1066	0.06825	0.1501	0.08185		0.0642	0.0668	0.0413	0.1014		0.0648	0.0684	0.0407	0.1114		0.0645	0.0676	0.041	0.1064	0.0654		0.1019	0.1017	0.0656	0.1449		0.0956	0.0982	0.0627	0.1444		0.09875	0.09995	0.06415	0.14465
59		t_n404		0.0752	0.0794	0.0379	0.1303		0.0752	0.0792	0.0488	0.1236		0.0752	0.0793	0.04335	0.12695	0.0836		0.0534	0.0538	0.0313	0.0859		0.0536	0.055	0.0304	0.093		0.0535	0.0544	0.03085	0.08945	0.0586		0.0753	0.0766	0.04	0.1214		0.0728	0.0727	0.0353	0.122		0.07405	0.07465	0.03765	0.1217
60		t_n405		0.1689	0.1699	0.1371	0.2061		0.1698	0.1714	0.1335	0.2162		0.16935	0.17065	0.1353	0.21115	0.07585		0.1413	0.1461	0.1176	0.1966		0.1428	0.1469	0.1201	0.1949		0.14205	0.1465	0.11885	0.19575	0.0769		0.1626	0.1643	0.1326	0.2013		0.1662	0.1677	0.1337	0.2089		0.1644	0.166	0.13315	0.2051
61		t_n406		0.1352	0.1355	0.1138	0.1602		0.1352	0.1361	0.111	0.1656		0.1352	0.1358	0.1124	0.1629	0.0505		0.1236	0.1233	0.1042	0.1425		0.1248	0.1246	0.1054	0.1441		0.1242	0.12395	0.1048	0.1433	0.0385		0.1304	0.1308	0.1092	0.1548		0.1314	0.1324	0.1105	0.1592		0.1309	0.1316	0.10985	0.157
62		t_n407		0.0704	0.0706	0.0574	0.0847		0.0702	0.0703	0.0563	0.0866		0.0703	0.07045	0.05685	0.08565	0.0288		0.0675	0.0678	0.0547	0.084		0.067	0.0675	0.0543	0.085		0.06725	0.06765	0.0545	0.0845	0.03		0.0695	0.0697	0.0553	0.0839		0.0701	0.0704	0.0564	0.0858		0.0698	0.07005	0.05585	0.08485
63		t_n408		0.0434	0.0438	0.0278	0.0609		0.0424	0.0432	0.0263	0.0625		0.0429	0.0435	0.02705	0.0617	0.03465		0.0344	0.0367	0.023	0.0562		0.0339	0.0361	0.0226	0.0565		0.03415	0.0364	0.0228	0.05635	0.03355		0.0407	0.0419	0.0273	0.0592		0.0414	0.0425	0.028	0.0606		0.04105	0.0422	0.02765	0.0599
64		t_n409		0.0544	0.0547	0.0442	0.0668		0.0541	0.0544	0.0433	0.0674		0.05425	0.05455	0.04375	0.0671	0.02335		0.0555	0.0556	0.045	0.0684		0.0558	0.0559	0.0448	0.0698		0.05565	0.05575	0.0449	0.0691	0.0242		0.0538	0.0539	0.0424	0.0657		0.0541	0.0544	0.0438	0.0669		0.05395	0.05415	0.0431	0.0663
65		t_n410		0.0433	0.0435	0.035	0.0534		0.0427	0.043	0.034	0.0539		0.043	0.04325	0.0345	0.05365	0.01915		0.0463	0.0464	0.0355	0.0567		0.0466	0.0469	0.0355	0.0584		0.04645	0.04665	0.0355	0.05755	0.02205		0.0426	0.0429	0.0337	0.0534		0.0429	0.0432	0.0347	0.0537		0.04275	0.04305	0.0342	0.05355
66		t_n411		0.0376	0.0378	0.0306	0.0457		0.0369	0.0373	0.0296	0.0462		0.03725	0.03755	0.0301	0.04595	0.01585		0.035	0.0358	0.0308	0.0431		0.0352	0.036	0.0303	0.0438		0.0351	0.0359	0.03055	0.04345	0.0129		0.0373	0.0374	0.0291	0.0455		0.0377	0.0378	0.0302	0.0464		0.0375	0.0376	0.02965	0.04595
67		t_n412		0.0326	0.0328	0.0263	0.0399		0.032	0.0322	0.0253	0.0401		0.0323	0.0325	0.0258	0.04	0.0142		0.0319	0.0319	0.027	0.0371		0.0321	0.0321	0.0264	0.0375		0.032	0.032	0.0267	0.0373	0.0106		0.0324	0.0324	0.025	0.0399		0.0326	0.0327	0.0256	0.0403		0.0325	0.03255	0.0253	0.0401
68		t_n413		0.0274	0.0276	0.0215	0.0344		0.0268	0.027	0.0208	0.0342		0.0271	0.0273	0.02115	0.0343	0.01315		0.0285	0.0284	0.0225	0.0339		0.0286	0.0285	0.0223	0.0342		0.02855	0.02845	0.0224	0.03405	0.01165		0.0271	0.0272	0.0204	0.0341		0.0273	0.0274	0.0209	0.0343		0.0272	0.0273	0.02065	0.0342
69		t_n414		0.0225	0.0227	0.0168	0.0297		0.0219	0.0221	0.0161	0.029		0.0222	0.0224	0.01645	0.02935	0.0129		0.0233	0.023	0.0145	0.0301		0.0231	0.0229	0.0144	0.0306		0.0232	0.02295	0.01445	0.03035	0.0159		0.0222	0.0223	0.0162	0.0292		0.0223	0.0224	0.0162	0.0291		0.02225	0.02235	0.0162	0.02915
70		t_n415		0.0097	0.0099	0.0052	0.0158		0.009	0.0092	0.0047	0.0152		0.00935	0.00955	0.00495	0.0155	0.01055		0.0116	0.0117	0.0042	0.02		0.0115	0.0116	0.0046	0.0202		0.01155	0.01165	0.0044	0.0201	0.0157		0.0092	0.0094	0.0047	0.0151		0.0092	0.0094	0.0049	0.0149		0.0092	0.0094	0.0048	0.015
71		t_n416		0.0292	0.0293	0.0229	0.0363		0.0286	0.0288	0.0221	0.0364		0.0289	0.02905	0.0225	0.03635	0.01385		0.0287	0.0286	0.022	0.0339		0.0289	0.0287	0.022	0.0344		0.0288	0.02865	0.022	0.03415	0.01215		0.0289	0.0289	0.022	0.0359		0.0292	0.0293	0.0223	0.0367		0.02905	0.0291	0.02215	0.0363
72		t_n417		0.0228	0.0229	0.0172	0.0294		0.0221	0.0224	0.0166	0.0291		0.02245	0.02265	0.0169	0.02925	0.01235		0.0218	0.0215	0.0121	0.0294		0.0221	0.0219	0.0134	0.0294		0.02195	0.0217	0.01275	0.0294	0.01665		0.0226	0.0227	0.0166	0.0292		0.0228	0.0229	0.0169	0.0296		0.0227	0.0228	0.01675	0.0294
73		t_n418		0.0139	0.014	0.0077	0.0212		0.0138	0.0139	0.0072	0.0207		0.01385	0.01395	0.00745	0.02095	0.0135		0.0102	0.0106	0.0037	0.0197		0.0109	0.0113	0.0045	0.0205		0.01055	0.01095	0.0041	0.0201	0.016		0.0136	0.0136	0.0074	0.0204		0.014	0.0141	0.008	0.0211		0.0138	0.01385	0.0077	0.02075
74		t_n419		0.0333	0.0334	0.0265	0.041		0.0328	0.033	0.0257	0.0412		0.03305	0.0332	0.0261	0.0411	0.015		0.0311	0.0309	0.024	0.0366		0.0311	0.0308	0.0233	0.0377		0.0311	0.03085	0.02365	0.03715	0.0135		0.0331	0.0332	0.0255	0.041		0.0334	0.0335	0.0263	0.0418		0.03325	0.03335	0.0259	0.0414
75		t_n420		0.0294	0.0295	0.0227	0.0372		0.0289	0.0291	0.0221	0.0371		0.02915	0.0293	0.0224	0.03715	0.01475		0.0256	0.0255	0.0172	0.033		0.0255	0.0253	0.0162	0.0331		0.02555	0.0254	0.0167	0.03305	0.01635		0.0292	0.0293	0.0218	0.0368		0.0295	0.0297	0.0224	0.0375		0.02935	0.0295	0.0221	0.03715
76		t_n421		0.026	0.026	0.0182	0.034		0.0255	0.0256	0.0179	0.0337		0.02575	0.0258	0.01805	0.03385	0.0158		0.0198	0.0195	0.0071	0.0297		0.0196	0.0194	0.0076	0.0299		0.0197	0.01945	0.00735	0.0298	0.02245		0.0256	0.0257	0.0176	0.0338		0.026	0.026	0.0181	0.0345		0.0258	0.02585	0.01785	0.03415
77		t_n422		0.0414	0.0422	0.031	0.0564		0.0414	0.0422	0.0304	0.0574		0.0414	0.0422	0.0307	0.0569	0.0262		0.0356	0.0388	0.0245	0.0569		0.0364	0.0392	0.0233	0.0577		0.036	0.039	0.0239	0.0573	0.0334		0.0409	0.042	0.0304	0.057		0.0418	0.0427	0.0314	0.0588		0.04135	0.04235	0.0309	0.0579
78		t_n423		0.0311	0.0312	0.0192	0.0437		0.0308	0.0308	0.0186	0.044		0.03095	0.031	0.0189	0.04385	0.02495		0.0259	0.0261	0.0133	0.0424		0.0263	0.0265	0.0124	0.0457		0.0261	0.0263	0.01285	0.04405	0.0312		0.0311	0.0311	0.0192	0.0442		0.032	0.0322	0.0201	0.0451		0.03155	0.03165	0.01965	0.04465
79		t_n424		0.0067	0.0072	0.0005	0.0164		0.0065	0.0071	0.0015	0.0164		0.0066	0.00715	0.001	0.0164	0.0154		0.0082	0.0091	0.0019	0.0221		0.0073	0.0083	0.0018	0.0215		0.00775	0.0087	0.00185	0.0218	0.01995		0.0071	0.0077	0.0019	0.0171		0.0072	0.0079	0.002	0.0177		0.00715	0.0078	0.00195	0.0174
80		t_n425		0.0218	0.0221	0.0099	0.0359		0.021	0.0213	0.0084	0.0362		0.0214	0.0217	0.00915	0.03605	0.0269		0.0179	0.0185	0.006	0.0335		0.0169	0.0179	0.0055	0.0342		0.0174	0.0182	0.00575	0.03385	0.0281		0.0209	0.0213	0.0091	0.0365		0.0209	0.0214	0.0089	0.0367		0.0209	0.02135	0.009	0.0366
81		t_n426		0.0058	0.0073	0.0008	0.0212		0.0062	0.0073	0.0009	0.0204		0.006	0.0073	0.00085	0.0208	0.01995		0.0025	0.0032	0.0004	0.0103		0.0024	0.0029	0.0003	0.0082		0.00245	0.00305	0.00035	0.00925	0.0089		0.0052	0.0061	0.0009	0.0165		0.0059	0.0069	0.0014	0.0187		0.00555	0.0065	0.00115	0.0176
82		t_n427		0.1069	0.1073	0.0841	0.1325		0.1079	0.108	0.082	0.1325		0.1074	0.10765	0.08305	0.1325	0.04945		0.0815	0.0818	0.07	0.0957		0.0822	0.0826	0.0709	0.097		0.08185	0.0822	0.07045	0.09635	0.0259		0.0976	0.0975	0.077	0.1215		0.0954	0.0969	0.078	0.1228		0.0965	0.0972	0.0775	0.12215
83		t_n428		0.0671	0.0669	0.0504	0.0836		0.0681	0.0679	0.0504	0.0849		0.0676	0.0674	0.0504	0.08425	0.03385		0.0484	0.0474	0.0301	0.0647		0.0487	0.0481	0.0309	0.0665		0.04855	0.04775	0.0305	0.0656	0.0351		0.063	0.0633	0.0479	0.08		0.063	0.0634	0.0473	0.081		0.063	0.06335	0.0476	0.0805
84		t_n429		0.0437	0.0441	0.0305	0.0609		0.0451	0.0451	0.0307	0.0617		0.0444	0.0446	0.0306	0.0613	0.0307		0.0309	0.0312	0.02	0.0479		0.031	0.0317	0.0203	0.0505		0.03095	0.03145	0.02015	0.0492	0.02905		0.0404	0.0417	0.0295	0.0588		0.0402	0.0409	0.0294	0.0568		0.0403	0.0413	0.02945	0.0578
85		t_n430		0.0288	0.0291	0.0196	0.0405		0.0299	0.0299	0.0198	0.0399		0.02935	0.0295	0.0197	0.0402	0.0205		0.0179	0.0184	0.0109	0.0282		0.0182	0.0187	0.0109	0.0295		0.01805	0.01855	0.0109	0.02885	0.01795		0.0276	0.028	0.019	0.0393		0.0274	0.0278	0.0189	0.039		0.0275	0.0279	0.01895	0.03915
86		t_n431		0.0155	0.0159	0.0097	0.0244		0.0161	0.0164	0.0096	0.0246		0.0158	0.01615	0.00965	0.0245	0.01485		0.0112	0.0115	0.006	0.0197		0.0114	0.0118	0.0061	0.0198		0.0113	0.01165	0.00605	0.01975	0.0137		0.0144	0.015	0.0092	0.0237		0.0144	0.0147	0.0091	0.0221		0.0144	0.01485	0.00915	0.0229
87		t_n432		0.0101	0.0104	0.0049	0.0178		0.0106	0.0109	0.0055	0.0182		0.01035	0.01065	0.0052	0.018	0.0128		0.0071	0.0075	0.0029	0.0149		0.0071	0.0077	0.0031	0.015		0.0071	0.0076	0.003	0.01495	0.01195		0.0097	0.01	0.0052	0.0172		0.0097	0.01	0.0048	0.0166		0.0097	0.01	0.005	0.0169
88		t_n433		0.067	0.0671	0.0539	0.0813		0.0684	0.0681	0.0543	0.0811		0.0677	0.0676	0.0541	0.0812	0.0271		0.056	0.0562	0.048	0.0649		0.0565	0.0565	0.0484	0.0646		0.05625	0.05635	0.0482	0.06475	0.01655		0.0611	0.0615	0.0488	0.076		0.0612	0.0619	0.0491	0.0779		0.06115	0.0617	0.04895	0.07695
89		t_n434		0.0498	0.0499	0.0376	0.0628		0.0507	0.0508	0.0382	0.0639		0.05025	0.05035	0.0379	0.06335	0.02545		0.0389	0.0395	0.0291	0.0535		0.0381	0.0392	0.0291	0.0535		0.0385	0.03935	0.0291	0.0535	0.0244		0.045	0.0455	0.0351	0.0584		0.0448	0.0457	0.0353	0.06		0.0449	0.0456	0.0352	0.0592
90		t_n435		0.0345	0.0345	0.0248	0.0454		0.0349	0.0351	0.0265	0.0464		0.0347	0.0348	0.02565	0.0459	0.02025		0.0257	0.0258	0.0154	0.0355		0.0249	0.0252	0.015	0.0354		0.0253	0.0255	0.0152	0.03545	0.02025		0.0318	0.032	0.0231	0.0415		0.0324	0.0328	0.0235	0.0437		0.0321	0.0324	0.0233	0.0426
91		t_n436		0.0136	0.0138	0.0087	0.0205		0.0137	0.014	0.009	0.0206		0.01365	0.0139	0.00885	0.02055	0.0117		0.0118	0.0123	0.005	0.0219		0.0112	0.0117	0.0056	0.021		0.0115	0.012	0.0053	0.02145	0.01615		0.0121	0.0124	0.0078	0.0183		0.0123	0.0126	0.008	0.0193		0.0122	0.0125	0.0079	0.0188
92		t_n437		0.01	0.0102	0.006	0.0156		0.0101	0.0104	0.0064	0.016		0.01005	0.0103	0.0062	0.0158	0.0096		0.0078	0.0083	0.0028	0.0159		0.0074	0.0078	0.0031	0.0153		0.0076	0.00805	0.00295	0.0156	0.01265		0.0091	0.0093	0.0056	0.014		0.0093	0.0096	0.0057	0.0149		0.0092	0.00945	0.00565	0.01445
93		t_n438		0.0265	0.0267	0.0202	0.0346		0.0275	0.0277	0.0212	0.0353		0.027	0.0272	0.0207	0.03495	0.01425		0.021	0.021	0.0164	0.0263		0.0214	0.0215	0.0169	0.0266		0.0212	0.02125	0.01665	0.02645	0.0098		0.0244	0.0246	0.0185	0.0317		0.0246	0.0248	0.018	0.032		0.0245	0.0247	0.01825	0.03185
94		t_n439		0.0178	0.018	0.013	0.0243		0.0186	0.0187	0.0137	0.0247		0.0182	0.01835	0.01335	0.0245	0.01115		0.0172	0.0173	0.0133	0.0219		0.0176	0.0177	0.0135	0.0223		0.0174	0.0175	0.0134	0.0221	0.0087		0.0166	0.0168	0.012	0.0224		0.0165	0.0166	0.0114	0.0226		0.01655	0.0167	0.0117	0.0225
95		t_n440		0.0166	0.0168	0.0119	0.0231		0.0173	0.0175	0.0127	0.0233		0.01695	0.01715	0.0123	0.0232	0.0109		0.0161	0.0161	0.012	0.0207		0.0165	0.0165	0.0123	0.0212		0.0163	0.0163	0.01215	0.02095	0.0088		0.0155	0.0157	0.0109	0.0211		0.0153	0.0154	0.0105	0.0211		0.0154	0.01555	0.0107	0.0211
96		t_n441		0.0142	0.0144	0.0096	0.0206		0.0148	0.015	0.0102	0.0209		0.0145	0.0147	0.0099	0.02075	0.01085		0.0124	0.0125	0.0072	0.0179		0.0128	0.0129	0.008	0.0183		0.0126	0.0127	0.0076	0.0181	0.0105		0.0133	0.0135	0.0089	0.0189		0.0131	0.0132	0.0083	0.0187		0.0132	0.01335	0.0086	0.0188
97		t_n442		0.009	0.0092	0.0054	0.014		0.0095	0.0096	0.0058	0.0143		0.00925	0.0094	0.0056	0.01415	0.00855		0.0082	0.0083	0.0038	0.0135		0.0084	0.0085	0.0041	0.0138		0.0083	0.0084	0.00395	0.01365	0.0097		0.0085	0.0087	0.005	0.0131		0.0084	0.0086	0.0051	0.0131		0.00845	0.00865	0.00505	0.0131
98		t_n443		0.0079	0.0081	0.005	0.0124		0.0084	0.0085	0.0049	0.0132		0.00815	0.0083	0.00495	0.0128	0.00785		0.0098	0.0099	0.0045	0.0162		0.01	0.0102	0.0048	0.0162		0.0099	0.01005	0.00465	0.0162	0.01155		0.0076	0.0077	0.0046	0.0117		0.0074	0.0076	0.0044	0.0116		0.0075	0.00765	0.0045	0.01165
99		t_n444		0.0073	0.0075	0.0045	0.0116		0.0077	0.0079	0.0044	0.0124		0.0075	0.0077	0.00445	0.012	0.00755		0.0082	0.0084	0.0033	0.0148		0.0083	0.0085	0.0036	0.0146		0.00825	0.00845	0.00345	0.0147	0.01125		0.007	0.0071	0.0042	0.011		0.0068	0.007	0.004	0.0108		0.0069	0.00705	0.0041	0.0109
100		t_n445		0.0526	0.0525	0.0392	0.066		0.0533	0.0531	0.0394	0.0664		0.05295	0.0528	0.0393	0.0662	0.0269		0.0447	0.0442	0.0315	0.0564		0.0449	0.0442	0.0314	0.0559		0.0448	0.0442	0.03145	0.05615	0.0247		0.0471	0.0474	0.0354	0.062		0.0466	0.0474	0.0359	0.0623		0.04685	0.0474	0.03565	0.06215
101		t_n446		0.0324	0.0325	0.0242	0.042		0.0327	0.0326	0.0234	0.0416		0.03255	0.03255	0.0238	0.0418	0.018		0.0283	0.0281	0.0184	0.0374		0.0282	0.0282	0.0184	0.0384		0.02825	0.02815	0.0184	0.0379	0.0195		0.0297	0.0299	0.0212	0.0398		0.0296	0.03	0.0217	0.0407		0.02965	0.02995	0.02145	0.04025
102		t_n447		0.0241	0.0243	0.0173	0.0325		0.0243	0.0243	0.0169	0.0324		0.0242	0.0243	0.0171	0.03245	0.01535		0.0209	0.0211	0.0124	0.0308		0.0209	0.0212	0.0123	0.0311		0.0209	0.02115	0.01235	0.03095	0.0186		0.0219	0.0221	0.015	0.0303		0.0219	0.0222	0.0153	0.0312		0.0219	0.02215	0.01515	0.03075
103		t_n448		0.0152	0.0154	0.0093	0.0225		0.0151	0.0153	0.0089	0.0227		0.01515	0.01535	0.0091	0.0226	0.0135		0.0111	0.0116	0.0055	0.02		0.0112	0.0116	0.005	0.0206		0.01115	0.0116	0.00525	0.0203	0.01505		0.0139	0.0142	0.0086	0.0216		0.014	0.0143	0.0086	0.0216		0.01395	0.01425	0.0086	0.0216
104		t_n449		0.0119	0.0126	0.0041	0.0251		0.0114	0.0123	0.0045	0.0244		0.01165	0.01245	0.0043	0.02475	0.02045		0.0078	0.0085	0.0023	0.0182		0.0083	0.0093	0.0029	0.0214		0.00805	0.0089	0.0026	0.0198	0.0172		0.0102	0.0111	0.0034	0.0241		0.0106	0.0113	0.0042	0.0231		0.0104	0.0112	0.0038	0.0236
105		t_n450		0.2092	0.2107	0.1723	0.2556		0.2071	0.2099	0.1709	0.257		0.20815	0.2103	0.1716	0.2563	0.0847		0.1731	0.1752	0.1298	0.2336		0.1722	0.1743	0.1296	0.23		0.17265	0.17475	0.1297	0.2318	0.1021		0.2085	0.2077	0.1706	0.247		0.21	0.2089	0.1686	0.2488		0.20925	0.2083	0.1696	0.2479
106		t_n451		0.1726	0.1732	0.1475	0.2007		0.1707	0.1723	0.1451	0.2038		0.17165	0.17275	0.1463	0.20225	0.05595		0.1371	0.1381	0.1155	0.1675		0.138	0.139	0.1168	0.1674		0.13755	0.13855	0.11615	0.16745	0.0513		0.1663	0.1671	0.1444	0.1921		0.1685	0.1686	0.1417	0.1955		0.1674	0.16785	0.14305	0.1938
107		t_n452		0.0717	0.0722	0.0563	0.0916		0.0718	0.072	0.0567	0.0894		0.07175	0.0721	0.0565	0.0905	0.034		0.0549	0.0546	0.0451	0.0641		0.0551	0.0548	0.0449	0.0644		0.055	0.0547	0.045	0.06425	0.01925		0.073	0.0728	0.0578	0.0879		0.0741	0.0742	0.0572	0.0919		0.07355	0.0735	0.0575	0.0899
108		t_n453		0.0324	0.0324	0.0197	0.0478		0.0327	0.0326	0.0196	0.0474		0.03255	0.0325	0.01965	0.0476	0.02795		0.0222	0.023	0.0139	0.0348		0.0222	0.0229	0.0134	0.0349		0.0222	0.02295	0.01365	0.03485	0.0212		0.0326	0.0327	0.0203	0.0464		0.0337	0.0338	0.0221	0.0474		0.03315	0.03325	0.0212	0.0469
109		t_n454		0.0171	0.0174	0.0108	0.0256		0.0171	0.0173	0.0109	0.0247		0.0171	0.01735	0.01085	0.02515	0.0143		0.0154	0.0156	0.0102	0.0219		0.0153	0.0155	0.0101	0.0217		0.01535	0.01555	0.01015	0.0218	0.01165		0.0177	0.0179	0.0116	0.0255		0.0182	0.0184	0.0114	0.0266		0.01795	0.01815	0.0115	0.02605
110		t_n455		0.0355	0.0357	0.0282	0.045		0.0354	0.0357	0.0283	0.0448		0.03545	0.0357	0.02825	0.0449	0.01665		0.0222	0.0223	0.017	0.0286		0.0221	0.0222	0.0167	0.0284		0.02215	0.02225	0.01685	0.0285	0.01165		0.035	0.0351	0.0277	0.0427		0.0359	0.036	0.028	0.0447		0.03545	0.03555	0.02785	0.0437
111		t_n456		0.0181	0.0184	0.0112	0.0268		0.0184	0.0185	0.0115	0.0266		0.01825	0.01845	0.01135	0.0267	0.01535		0.0159	0.016	0.0106	0.0223		0.0157	0.0159	0.0109	0.022		0.0158	0.01595	0.01075	0.02215	0.0114		0.0193	0.0194	0.0127	0.0269		0.0196	0.0196	0.0121	0.0283		0.01945	0.0195	0.0124	0.0276
112		t_n457		0.0769	0.0798	0.0587	0.1138		0.0757	0.0788	0.0564	0.1121		0.0763	0.0793	0.05755	0.11295	0.0554		0.0552	0.0568	0.0311	0.0965		0.0551	0.0549	0.0316	0.0875		0.05515	0.05585	0.03135	0.092	0.06065		0.078	0.0788	0.0586	0.1073		0.0795	0.0801	0.0581	0.1097		0.07875	0.07945	0.05835	0.1085
113		t_n458		0.0335	0.0345	0.0214	0.0574		0.0326	0.0334	0.0202	0.0551		0.03305	0.03395	0.0208	0.05625	0.03545		0.0225	0.0229	0.0112	0.0363		0.0224	0.0228	0.0105	0.0356		0.02245	0.02285	0.01085	0.03595	0.0251		0.0333	0.0337	0.0206	0.0515		0.0338	0.034	0.0192	0.0539		0.03355	0.03385	0.0199	0.0527
114		t_n459		0.0201	0.0208	0.0117	0.0339		0.0194	0.0201	0.0116	0.033		0.01975	0.02045	0.01165	0.03345	0.0218		0.0128	0.0138	0.0058	0.0267		0.013	0.0138	0.0058	0.0268		0.0129	0.0138	0.0058	0.02675	0.02095		0.0202	0.0207	0.0111	0.0332		0.0201	0.0208	0.0112	0.0345		0.02015	0.02075	0.01115	0.03385
115		t_n460		0.0067	0.0071	0.0019	0.0151		0.0063	0.0068	0.0015	0.0163		0.0065	0.00695	0.0017	0.0157	0.014		0.0032	0.0036	0.0007	0.0099		0.004	0.0047	0.001	0.0121		0.0036	0.00415	0.00085	0.011	0.01015		0.0057	0.0064	0.0004	0.0159		0.0064	0.0072	0.002	0.0182		0.00605	0.0068	0.0012	0.01705
116		t_n461		0.0129	0.0136	0.0047	0.0264		0.0121	0.0128	0.0044	0.0255		0.0125	0.0132	0.00455	0.02595	0.0214		0.0064	0.0072	0.0014	0.0181		0.0067	0.0077	0.0021	0.0189		0.00655	0.00745	0.00175	0.0185	0.01675		0.0122	0.0129	0.0043	0.0247		0.012	0.0129	0.0041	0.0266		0.0121	0.0129	0.0042	0.02565
117		t_n462		0.0199	0.0207	0.0128	0.0328		0.0193	0.02	0.0119	0.0331		0.0196	0.02035	0.01235	0.03295	0.0206		0.0162	0.017	0.0058	0.0328		0.0149	0.0161	0.0066	0.0315		0.01555	0.01655	0.0062	0.03215	0.02595		0.0196	0.0203	0.013	0.032		0.02	0.0207	0.0124	0.0334		0.0198	0.0205	0.0127	0.0327
118		t_n463		0.0174	0.0181	0.0105	0.0297		0.0169	0.0176	0.0103	0.0293		0.01715	0.01785	0.0104	0.0295	0.0191		0.0134	0.0145	0.0043	0.0302		0.0123	0.0135	0.0046	0.0284		0.01285	0.014	0.00445	0.0293	0.02485		0.0172	0.0179	0.0111	0.0284		0.0176	0.0183	0.0107	0.0299		0.0174	0.0181	0.0109	0.02915
119	119	t_n464		0.5875	0.5868	0.5811	0.5889		0.5874	0.5867	0.5803	0.5889		0.58745	0.58675	0.5807	0.5889	0.0082		0.5866	0.5856	0.5763	0.5889		0.5864	0.5853	0.576	0.5889		0.5865	0.58545	0.57615	0.5889	0.01275		0.6568	0.6574	0.623	0.6969		0.6594	0.6597	0.6252	0.6973		0.6581	0.65855	0.6241	0.6971
120		t_n465		0.2848	0.2843	0.1868	0.3854		0.2739	0.2778	0.1874	0.3792		0.27935	0.28105	0.1871	0.3823	0.1952		0.1316	0.1341	0.0919	0.197		0.1311	0.1342	0.0934	0.2022		0.13135	0.13415	0.09265	0.1996	0.10695		0.2531	0.2606	0.1798	0.3603		0.2537	0.2577	0.1746	0.345		0.2534	0.25915	0.1772	0.35265
121		t_n466		0.0838	0.0975	0.0391	0.208		0.0938	0.1078	0.0545	0.2091		0.0888	0.10265	0.0468	0.20855	0.16175		0.034	0.0398	0.0208	0.0868		0.0336	0.0383	0.0215	0.072		0.0338	0.03905	0.02115	0.0794	0.05825		0.1125	0.1216	0.0567	0.2273		0.0934	0.1097	0.0508	0.2255		0.10295	0.11565	0.05375	0.2264
122		t_n467		0.0674	0.0713	0.0335	0.1459		0.0677	0.0708	0.0373	0.1327		0.06755	0.07105	0.0354	0.1393	0.1039		0.0239	0.024	0.0128	0.0348		0.0242	0.0242	0.013	0.0349		0.02405	0.0241	0.0129	0.03485	0.02195		0.0675	0.0674	0.0317	0.1169		0.0679	0.0683	0.0347	0.1129		0.0677	0.06785	0.0332	0.1149
123		t_n468		0.0511	0.0542	0.0268	0.1129		0.0501	0.0518	0.0272	0.0918		0.0506	0.053	0.027	0.10235	0.07535		0.0183	0.0185	0.0079	0.0303		0.0185	0.0186	0.009	0.0298		0.0184	0.01855	0.00845	0.03005	0.0216		0.0495	0.0511	0.0231	0.0855		0.0502	0.0525	0.0271	0.0865		0.04985	0.0518	0.0251	0.086
124		t_n469		0.0322	0.0352	0.0112	0.0748		0.0311	0.0328	0.0099	0.0689		0.03165	0.034	0.01055	0.07185	0.0613		0.0119	0.0124	0.0033	0.0248		0.0115	0.0117	0.0011	0.0232		0.0117	0.01205	0.0022	0.024	0.0218		0.0298	0.0304	0.0078	0.0638		0.0313	0.0325	0.0098	0.0661		0.03055	0.03145	0.0088	0.06495
125		t_n470		0.0597	0.0587	0.031	0.0863		0.0585	0.058	0.032	0.0854		0.0591	0.05835	0.0315	0.08585	0.05435		0.0782	0.0784	0.0554	0.1032		0.0773	0.0772	0.0552	0.1022		0.07775	0.0778	0.0553	0.1027	0.0474		0.0709	0.0701	0.0393	0.1011		0.0731	0.0732	0.0479	0.1022		0.072	0.07165	0.0436	0.10165
126	126	t_n471		0.4304	0.4301	0.3993	0.4595		0.4306	0.4309	0.4003	0.4615		0.4305	0.4305	0.3998	0.4605	0.0607		0.3782	0.3779	0.3464	0.4104		0.3802	0.38	0.3481	0.4135		0.3792	0.37895	0.34725	0.41195	0.0647		0.4651	0.4653	0.4286	0.5039		0.4754	0.4748	0.4347	0.5142		0.47025	0.47005	0.43165	0.50905
127	127	t_n472		0.2358	0.2367	0.2174	0.2595		0.2348	0.2381	0.2201	0.2632		0.2353	0.2374	0.21875	0.26135	0.0426		0.2326	0.233	0.2141	0.2539		0.2335	0.2338	0.2169	0.2527		0.23305	0.2334	0.2155	0.2533	0.0378		0.2547	0.2552	0.2362	0.2764		0.2631	0.2644	0.237	0.2986		0.2589	0.2598	0.2366	0.2875
128		t_n473		0.2033	0.2042	0.1849	0.2263		0.2027	0.2053	0.1869	0.2305		0.203	0.20475	0.1859	0.2284	0.0425		0.1964	0.1965	0.1773	0.2161		0.1974	0.1973	0.1782	0.2166		0.1969	0.1969	0.17775	0.21635	0.0386		0.2186	0.219	0.2	0.2397		0.2257	0.2271	0.2022	0.2598		0.22215	0.22305	0.2011	0.24975
129		t_n474		0.1393	0.1398	0.119	0.1633		0.1406	0.1419	0.1231	0.1676		0.13995	0.14085	0.12105	0.16545	0.0444		0.1264	0.126	0.1065	0.1445		0.1275	0.1272	0.1076	0.1454		0.12695	0.1266	0.10705	0.14495	0.0379		0.1509	0.1511	0.1324	0.1716		0.1563	0.1576	0.133	0.1893		0.1536	0.15435	0.1327	0.18045
130		t_n475		0.0699	0.0699	0.056	0.0846		0.0696	0.0699	0.0571	0.0845		0.06975	0.0699	0.05655	0.08455	0.028		0.0588	0.0602	0.051	0.0753		0.0597	0.0611	0.0515	0.0759		0.05925	0.06065	0.05125	0.0756	0.02435		0.0741	0.0741	0.0604	0.0873		0.0768	0.077	0.0622	0.0927		0.07545	0.07555	0.0613	0.09
131		t_n476		0.0312	0.0312	0.0178	0.0469		0.0314	0.0315	0.0189	0.0471		0.0313	0.03135	0.01835	0.047	0.02865		0.0216	0.0223	0.0121	0.035		0.0226	0.0232	0.0124	0.0354		0.0221	0.02275	0.01225	0.0352	0.02295		0.0335	0.0335	0.0198	0.0491		0.035	0.0349	0.0202	0.052		0.03425	0.0342	0.02	0.05055
132		t_n477		0.0113	0.0116	0.0063	0.0185		0.0112	0.0115	0.0067	0.0178		0.01125	0.01155	0.0065	0.01815	0.01165		0.0117	0.0119	0.0066	0.0178		0.012	0.0122	0.0072	0.0178		0.01185	0.01205	0.0069	0.0178	0.0109		0.0124	0.0127	0.0071	0.0196		0.0125	0.0128	0.0071	0.0201		0.01245	0.01275	0.0071	0.01985
133		t_n478		0.0339	0.0339	0.0241	0.0442		0.0347	0.0348	0.0268	0.044		0.0343	0.03435	0.02545	0.0441	0.01865		0.0252	0.0253	0.0182	0.0333		0.0255	0.0256	0.0184	0.0335		0.02535	0.02545	0.0183	0.0334	0.0151		0.0364	0.0367	0.0283	0.0469		0.0381	0.0386	0.0292	0.0512		0.03725	0.03765	0.02875	0.04905
134		t_n479		0.0105	0.0113	0.0048	0.0225		0.0118	0.0129	0.0056	0.0255		0.01115	0.0121	0.0052	0.024	0.0188		0.0116	0.0123	0.0041	0.0242		0.0127	0.0131	0.0048	0.0242		0.01215	0.0127	0.00445	0.0242	0.01975		0.0115	0.0132	0.0049	0.0285		0.0124	0.0139	0.0055	0.0283		0.01195	0.01355	0.0052	0.0284
135		t_n480		0.0018	0.0021	0.0001	0.0067		0.002	0.0023	0.0002	0.006		0.0019	0.0022	0.00015	0.00635	0.0062		0.0019	0.0022	0.0001	0.006		0.0017	0.0021	0.0002	0.007		0.0018	0.00215	0.00015	0.0065	0.00635		0.0018	0.0021	0.0001	0.006		0.0023	0.0026	0.0003	0.0071		0.00205	0.00235	0.0002	0.00655
136		t_n481		0.0367	0.0382	0.0253	0.0579		0.0372	0.039	0.0259	0.0593		0.03695	0.0386	0.0256	0.0586	0.033		0.0312	0.0312	0.0223	0.0425		0.0314	0.0314	0.0232	0.0426		0.0313	0.0313	0.02275	0.04255	0.0198		0.0393	0.041	0.0278	0.0607		0.041	0.0427	0.0284	0.0658		0.04015	0.04185	0.0281	0.06325
137		t_n482		0.005	0.0056	0.0013	0.0142		0.0055	0.0059	0.001	0.0138		0.00525	0.00575	0.00115	0.014	0.01285		0.004	0.005	0.0008	0.0158		0.004	0.0047	0.0008	0.013		0.004	0.00485	0.0008	0.0144	0.0136		0.0054	0.0061	0.0009	0.0151		0.0053	0.0064	0.0012	0.0172		0.00535	0.00625	0.00105	0.01615
138		t_n483		0.0775	0.0792	0.0653	0.1018		0.0772	0.0791	0.0652	0.1015		0.07735	0.07915	0.06525	0.10165	0.0364		0.0755	0.0766	0.0565	0.1056		0.0757	0.0766	0.0567	0.1066		0.0756	0.0766	0.0566	0.1061	0.0495		0.0818	0.0835	0.0695	0.1082		0.0856	0.0871	0.0715	0.1123		0.0837	0.0853	0.0705	0.11025
139		t_n484		0.0303	0.0317	0.0097	0.0618		0.0309	0.032	0.0129	0.0603		0.0306	0.03185	0.0113	0.06105	0.04975		0.0182	0.0195	0.006	0.0429		0.0182	0.0195	0.005	0.0442		0.0182	0.0195	0.0055	0.04355	0.03805		0.0335	0.0345	0.0107	0.0652		0.0335	0.035	0.0119	0.0688		0.0335	0.03475	0.0113	0.067
140		t_n485		0.07	0.0704	0.0596	0.0832		0.0701	0.0705	0.0599	0.0837		0.07005	0.07045	0.05975	0.08345	0.0237		0.0643	0.0651	0.0537	0.0814		0.0647	0.0655	0.0538	0.0819		0.0645	0.0653	0.05375	0.08165	0.0279		0.0741	0.0743	0.0633	0.0863		0.0772	0.0776	0.0654	0.0913		0.07565	0.07595	0.06435	0.0888
141		t_n486		0.0324	0.0324	0.0245	0.041		0.0325	0.0325	0.0247	0.0411		0.03245	0.03245	0.0246	0.04105	0.01645		0.0307	0.0306	0.0245	0.0368		0.0311	0.031	0.0249	0.037		0.0309	0.0308	0.0247	0.0369	0.0122		0.034	0.0341	0.0265	0.0422		0.0355	0.0357	0.0277	0.0449		0.03475	0.0349	0.0271	0.04355
142		t_n487		0.0226	0.0228	0.0168	0.0299		0.0227	0.0229	0.0167	0.0297		0.02265	0.02285	0.01675	0.0298	0.01305		0.021	0.0211	0.015	0.0274		0.0214	0.0214	0.0152	0.0281		0.0212	0.02125	0.0151	0.02775	0.01265		0.0238	0.0239	0.0177	0.0307		0.0249	0.0251	0.0187	0.0326		0.02435	0.0245	0.0182	0.03165
143		t_n488		0.0207	0.0209	0.0151	0.0278		0.0208	0.0209	0.0148	0.0279		0.02075	0.0209	0.01495	0.02785	0.0129		0.0189	0.019	0.0128	0.0253		0.0192	0.0192	0.013	0.026		0.01905	0.0191	0.0129	0.02565	0.01275		0.0218	0.022	0.0158	0.0287		0.0229	0.0231	0.0166	0.0305		0.02235	0.02255	0.0162	0.0296
144		t_n489		0.0091	0.0103	0.0028	0.0229		0.0091	0.0105	0.0032	0.0229		0.0091	0.0104	0.003	0.0229	0.0199		0.0141	0.0139	0.0056	0.0217		0.0143	0.0141	0.0056	0.0221		0.0142	0.014	0.0056	0.0219	0.0163		0.0096	0.0109	0.0033	0.0236		0.0096	0.0112	0.0032	0.0246		0.0096	0.01105	0.00325	0.0241
145		t_n490		0.0059	0.0061	0.0019	0.0115		0.0052	0.0053	0.0003	0.0114		0.00555	0.0057	0.0011	0.01145	0.01035		0.0057	0.006	0.002	0.0113		0.0057	0.0059	0.0023	0.0109		0.0057	0.00595	0.00215	0.0111	0.00895		0.0058	0.0061	0.0021	0.0121		0.006	0.0062	0.0015	0.0125		0.0059	0.00615	0.0018	0.0123
146		t_n491		0.0348	0.0351	0.0263	0.0464		0.0349	0.0352	0.0265	0.0465		0.03485	0.03515	0.0264	0.04645	0.02005		0.0327	0.0329	0.0256	0.0436		0.033	0.0332	0.0256	0.0442		0.03285	0.03305	0.0256	0.0439	0.0183		0.0369	0.0371	0.0279	0.0488		0.0383	0.0386	0.029	0.0503		0.0376	0.03785	0.02845	0.04955
147		t_n492		0.0198	0.02	0.0131	0.0279		0.0199	0.02	0.0132	0.0279		0.01985	0.02	0.01315	0.0279	0.01475		0.0202	0.0203	0.0132	0.0283		0.0203	0.0204	0.0133	0.0287		0.02025	0.02035	0.01325	0.0285	0.01525		0.0206	0.0208	0.0139	0.0293		0.0214	0.0217	0.0142	0.0306		0.021	0.02125	0.01405	0.02995
148		t_n493		0.224	0.2249	0.206	0.2459		0.2229	0.2263	0.209	0.251		0.22345	0.2256	0.2075	0.24845	0.04095		0.2193	0.2197	0.2013	0.2393		0.2202	0.2206	0.204	0.24		0.21975	0.22015	0.20265	0.23965	0.037		0.2418	0.2422	0.2237	0.2624		0.2498	0.2511	0.2252	0.2841		0.2458	0.24665	0.22445	0.27325
149		t_n494		0.2014	0.2024	0.1841	0.2227		0.2007	0.2036	0.1863	0.227		0.20105	0.203	0.1852	0.22485	0.03965		0.1953	0.1955	0.1786	0.213		0.1961	0.1963	0.1802	0.2139		0.1957	0.1959	0.1794	0.21345	0.03405		0.2173	0.2176	0.2007	0.2366		0.2248	0.226	0.2013	0.2574		0.22105	0.2218	0.201	0.247
150	150	t_n495		0.1772	0.1777	0.1596	0.1981		0.177	0.179	0.161	0.2021		0.1771	0.17835	0.1603	0.2001	0.0398		0.1707	0.1708	0.1522	0.1897		0.1713	0.1716	0.1545	0.1907		0.171	0.1712	0.15335	0.1902	0.03685		0.1904	0.1906	0.1729	0.2104		0.1971	0.1982	0.1743	0.2278		0.19375	0.1944	0.1736	0.2191
151		t_n496		0.068	0.068	0.0537	0.0828		0.0666	0.0669	0.0522	0.0834		0.0673	0.06745	0.05295	0.0831	0.03015		0.0507	0.0504	0.04	0.0599		0.0507	0.0507	0.0404	0.0603		0.0507	0.05055	0.0402	0.0601	0.0199		0.071	0.071	0.0551	0.0863		0.0743	0.0743	0.0561	0.0916		0.07265	0.07265	0.0556	0.08895
152		t_n497		0.0219	0.0221	0.015	0.0308		0.0209	0.0213	0.0142	0.0313		0.0214	0.0217	0.0146	0.03105	0.01645		0.0142	0.0144	0.0102	0.0195		0.0142	0.0143	0.0102	0.0191		0.0142	0.01435	0.0102	0.0193	0.0091		0.0213	0.0216	0.0148	0.0303		0.0228	0.0231	0.0155	0.033		0.02205	0.02235	0.01515	0.03165
153		t_n498		0.0034	0.0036	0.0005	0.0086		0.0029	0.0033	0.0004	0.0085		0.00315	0.00345	0.00045	0.00855	0.0081		0.0028	0.0032	0.0005	0.0086		0.0026	0.003	0.0007	0.0075		0.0027	0.0031	0.0006	0.00805	0.00745		0.0032	0.0035	0.0008	0.008		0.0034	0.0037	0.0005	0.0088		0.0033	0.0036	0.00065	0.0084
154		t_n499		0.0199	0.02	0.0119	0.0292		0.0187	0.0189	0.0105	0.0293		0.0193	0.01945	0.0112	0.02925	0.01805		0.0117	0.0118	0.0078	0.0167		0.0117	0.0118	0.0079	0.0164		0.0117	0.0118	0.00785	0.01655	0.0087		0.0189	0.019	0.0102	0.0282		0.0204	0.0205	0.0109	0.031		0.01965	0.01975	0.01055	0.0296
155		t_n500		0.0182	0.0184	0.0132	0.0244		0.018	0.0182	0.0127	0.0246		0.0181	0.0183	0.01295	0.0245	0.01155		0.0148	0.0148	0.0106	0.0195		0.0148	0.015	0.0108	0.02		0.0148	0.0149	0.0107	0.01975	0.00905		0.0194	0.0196	0.0142	0.0261		0.0201	0.0203	0.0138	0.0279		0.01975	0.01995	0.014	0.027
156		t_n501		0.0165	0.0166	0.0117	0.0223		0.0163	0.0165	0.0113	0.0224		0.0164	0.01655	0.0115	0.02235	0.01085		0.0136	0.0137	0.0096	0.0184		0.0137	0.0138	0.0096	0.0189		0.01365	0.01375	0.0096	0.01865	0.00905		0.0177	0.0179	0.0126	0.0241		0.0183	0.0185	0.0123	0.0258		0.018	0.0182	0.01245	0.02495
157		t_n502		0.0058	0.006	0.0002	0.0135		0.0055	0.006	0.0013	0.013		0.00565	0.006	0.00075	0.01325	0.0125		0.0052	0.0056	0.0017	0.0124		0.0052	0.0056	0.001	0.0127		0.0052	0.0056	0.00135	0.01255	0.0112		0.0069	0.0072	0.0009	0.0153		0.0061	0.0068	0.0015	0.016		0.0065	0.007	0.0012	0.01565
158		t_n503		0.0187	0.0193	0.0128	0.0282		0.0187	0.0192	0.0129	0.0279		0.0187	0.01925	0.01285	0.02805	0.0152		0.0159	0.0161	0.0117	0.0214		0.0159	0.016	0.0118	0.0211		0.0159	0.01605	0.01175	0.02125	0.0095		0.0199	0.0203	0.014	0.0293		0.0206	0.0214	0.0143	0.0331		0.02025	0.02085	0.01415	0.0312
159		t_n504		0.0124	0.0127	0.0089	0.0174		0.0125	0.0127	0.0087	0.0174		0.01245	0.0127	0.0088	0.0174	0.0086		0.0088	0.009	0.0052	0.014		0.0088	0.009	0.0051	0.0139		0.0088	0.009	0.00515	0.01395	0.0088		0.0131	0.0132	0.0093	0.0181		0.0137	0.014	0.0097	0.0203		0.0134	0.0136	0.0095	0.0192
160		t_n505		0.0078	0.008	0.0045	0.0128		0.0078	0.008	0.0044	0.0127		0.0078	0.008	0.00445	0.01275	0.0083		0.0053	0.0054	0.0032	0.0082		0.0053	0.0054	0.0029	0.0083		0.0053	0.0054	0.00305	0.00825	0.0052		0.0082	0.0084	0.0047	0.0132		0.0085	0.0089	0.0049	0.0155		0.00835	0.00865	0.0048	0.01435
161	161	t_n506		0.1976	0.1985	0.1803	0.2187		0.1969	0.1998	0.1828	0.2229		0.19725	0.19915	0.18155	0.2208	0.03925		0.1916	0.1917	0.175	0.2093		0.1923	0.1926	0.1764	0.2099		0.19195	0.19215	0.1757	0.2096	0.0339		0.2133	0.2136	0.1968	0.2319		0.2206	0.2219	0.1975	0.2527		0.21695	0.21775	0.19715	0.2423
162		t_n507		0.0413	0.0424	0.0327	0.0579		0.041	0.0419	0.0327	0.0565		0.04115	0.04215	0.0327	0.0572	0.0245		0.0347	0.0377	0.028	0.0579		0.0352	0.0387	0.0284	0.0586		0.03495	0.0382	0.0282	0.05825	0.03005		0.0424	0.0439	0.034	0.0616		0.0459	0.0474	0.0352	0.068		0.04415	0.04565	0.0346	0.0648
163		t_n508		0.037	0.0377	0.03	0.0489		0.0369	0.0374	0.0298	0.0478		0.03695	0.03755	0.0299	0.04835	0.01845		0.0305	0.0305	0.0248	0.0355		0.0308	0.0308	0.0248	0.0364		0.03065	0.03065	0.0248	0.03595	0.01115		0.0384	0.0392	0.0309	0.0527		0.0412	0.0421	0.0323	0.0582		0.0398	0.04065	0.0316	0.05545
164		t_n509		0.032	0.0324	0.0255	0.0425		0.0319	0.0322	0.0251	0.041		0.03195	0.0323	0.0253	0.04175	0.01645		0.021	0.0211	0.0157	0.0271		0.0214	0.0215	0.016	0.0274		0.0212	0.0213	0.01585	0.02725	0.0114		0.0329	0.0336	0.026	0.0452		0.0352	0.036	0.0274	0.0499		0.03405	0.0348	0.0267	0.04755
165		t_n510		0.0218	0.0219	0.0134	0.0309		0.0218	0.0218	0.0137	0.03		0.0218	0.02185	0.01355	0.03045	0.0169		0.0121	0.0124	0.005	0.0213		0.0126	0.0129	0.006	0.0214		0.01235	0.01265	0.0055	0.02135	0.01585		0.0227	0.0227	0.0142	0.0312		0.0239	0.0239	0.0135	0.0338		0.0233	0.0233	0.01385	0.0325
166		t_n511		0.032	0.0324	0.0249	0.0422		0.0317	0.0319	0.0248	0.0413		0.03185	0.03215	0.02485	0.04175	0.0169		0.0247	0.0247	0.019	0.0307		0.025	0.0249	0.0187	0.0312		0.02485	0.0248	0.01885	0.03095	0.0121		0.0328	0.0335	0.0254	0.046		0.0353	0.036	0.0268	0.0493		0.03405	0.03475	0.0261	0.04765
167		t_n512		0.0147	0.0151	0.0092	0.0234		0.0146	0.0148	0.009	0.0223		0.01465	0.01495	0.0091	0.02285	0.01375		0.0103	0.0109	0.0054	0.0192		0.0109	0.0114	0.0053	0.0201		0.0106	0.01115	0.00535	0.01965	0.0143		0.0148	0.0153	0.0089	0.0248		0.016	0.0166	0.0099	0.0272		0.0154	0.01595	0.0094	0.026
168		t_n513		0.0038	0.0039	0.0019	0.0066		0.0037	0.0038	0.0019	0.0063		0.00375	0.00385	0.0019	0.00645	0.00455		0.0037	0.0038	0.0014	0.0069		0.0038	0.0039	0.0013	0.007		0.00375	0.00385	0.00135	0.00695	0.0056		0.0039	0.004	0.0019	0.0071		0.0042	0.0044	0.0021	0.0078		0.00405	0.0042	0.002	0.00745
169		t_n514		0.1382	0.139	0.124	0.1582		0.1386	0.1402	0.124	0.1629		0.1384	0.1396	0.124	0.16055	0.03655		0.1366	0.1368	0.1238	0.1508		0.1377	0.1376	0.1235	0.1512		0.13715	0.1372	0.12365	0.151	0.02735		0.1495	0.1497	0.1351	0.1662		0.1545	0.1555	0.136	0.1817		0.152	0.1526	0.13555	0.17395
170		t_n515		0.0728	0.073	0.0622	0.0848		0.0736	0.0741	0.0636	0.0871		0.0732	0.07355	0.0629	0.08595	0.02305		0.0627	0.0629	0.0543	0.0727		0.0634	0.0634	0.0544	0.0738		0.06305	0.06315	0.05435	0.07325	0.0189		0.0779	0.0778	0.067	0.0889		0.081	0.0815	0.0689	0.096		0.07945	0.07965	0.06795	0.09245
171		t_n516		0.0261	0.0263	0.0157	0.0384		0.0263	0.0265	0.0145	0.039		0.0262	0.0264	0.0151	0.0387	0.0236		0.0281	0.0283	0.0161	0.0444		0.0286	0.0285	0.0146	0.0469		0.02835	0.0284	0.01535	0.04565	0.0303		0.0275	0.028	0.0175	0.0402		0.0289	0.029	0.0163	0.0428		0.0282	0.0285	0.0169	0.0415
172		t_n517		0.0203	0.0206	0.0123	0.0308		0.0208	0.0209	0.0113	0.0318		0.02055	0.02075	0.0118	0.0313	0.0195		0.0207	0.0211	0.0101	0.0332		0.0208	0.021	0.0094	0.0332		0.02075	0.02105	0.00975	0.0332	0.02345		0.0216	0.022	0.0137	0.0331		0.0226	0.0229	0.013	0.0342		0.0221	0.02245	0.01335	0.03365
173		t_n518		0.0182	0.0185	0.0101	0.0285		0.0186	0.0187	0.0086	0.0296		0.0184	0.0186	0.00935	0.02905	0.0197		0.0166	0.0172	0.0069	0.0298		0.0162	0.0168	0.0066	0.0296		0.0164	0.017	0.00675	0.0297	0.02295		0.0194	0.0198	0.0115	0.0311		0.0201	0.0206	0.0106	0.0318		0.01975	0.0202	0.01105	0.03145
174		t_n519		0.0023	0.0025	0.0005	0.0059		0.0025	0.0027	0.0006	0.0062		0.0024	0.0026	0.00055	0.00605	0.0055		0.0022	0.0028	0.0003	0.0085		0.002	0.0024	0.0003	0.0067		0.0021	0.0026	0.0003	0.0076	0.0073		0.0027	0.0029	0.0007	0.0066		0.0028	0.0031	0.0009	0.0073		0.00275	0.003	0.0008	0.00695
175		t_n520		0.062	0.0622	0.0524	0.0732		0.0629	0.0632	0.0533	0.0748		0.06245	0.0627	0.05285	0.074	0.02115		0.0542	0.054	0.046	0.0614		0.0549	0.0545	0.0462	0.0623		0.05455	0.05425	0.0461	0.06185	0.01575		0.0661	0.0662	0.0567	0.0764		0.0689	0.0695	0.0585	0.0828		0.0675	0.06785	0.0576	0.0796
176		t_n521		0.049	0.0486	0.0327	0.0655		0.0503	0.0499	0.0335	0.0672		0.04965	0.04925	0.0331	0.06635	0.03325		0.0351	0.0382	0.0266	0.0557		0.0356	0.039	0.0262	0.0566		0.03535	0.0386	0.0264	0.05615	0.02975		0.0509	0.0508	0.0342	0.0689		0.0547	0.0541	0.0358	0.0738		0.0528	0.05245	0.035	0.07135
177		t_n522		0.0326	0.0327	0.0255	0.0408		0.0333	0.0333	0.0258	0.0412		0.03295	0.033	0.02565	0.041	0.01535		0.0277	0.0278	0.0212	0.0342		0.0282	0.0281	0.0212	0.0345		0.02795	0.02795	0.0212	0.03435	0.01315		0.0347	0.0347	0.0272	0.0425		0.0363	0.0364	0.0281	0.0458		0.0355	0.03555	0.02765	0.04415
178		t_n523		0.0198	0.02	0.0135	0.0275		0.0202	0.0204	0.0136	0.0282		0.02	0.0202	0.01355	0.02785	0.0143		0.0153	0.0155	0.0103	0.021		0.0155	0.0157	0.0106	0.0215		0.0154	0.0156	0.01045	0.02125	0.0108		0.0209	0.021	0.0144	0.0285		0.0218	0.0221	0.0149	0.0309		0.02135	0.02155	0.01465	0.0297
179		t_n524		0.0538	0.054	0.044	0.0644		0.0548	0.055	0.0453	0.0666		0.0543	0.0545	0.04465	0.0655	0.02085		0.0432	0.043	0.034	0.0514		0.0434	0.0432	0.034	0.052		0.0433	0.0431	0.034	0.0517	0.0177		0.0574	0.0574	0.0476	0.0675		0.0598	0.0602	0.0494	0.0731		0.0586	0.0588	0.0485	0.0703
180		t_n525		0.0271	0.0273	0.0199	0.0361		0.0279	0.0281	0.0204	0.0369		0.0275	0.0277	0.02015	0.0365	0.01635		0.0239	0.024	0.0182	0.0305		0.0242	0.0243	0.0184	0.0311		0.02405	0.02415	0.0183	0.0308	0.0125		0.0282	0.0284	0.021	0.0368		0.0298	0.0301	0.0222	0.0394		0.029	0.02925	0.0216	0.0381
181		t_n526		0.0084	0.0087	0.0022	0.017		0.0089	0.0092	0.0016	0.0186		0.00865	0.00895	0.0019	0.0178	0.0159		0.0107	0.0113	0.0021	0.0243		0.0123	0.0123	0.001	0.0253		0.0115	0.0118	0.00155	0.0248	0.02325		0.0081	0.0081	0.0011	0.0162		0.0096	0.0098	0.0019	0.0187		0.00885	0.00895	0.0015	0.01745
182		t_n527		0.0053	0.0056	0.0016	0.0116		0.0059	0.006	0.0009	0.0119		0.0056	0.0058	0.00125	0.01175	0.0105		0.0086	0.0088	0.004	0.0147		0.0087	0.0087	0.0034	0.0146		0.00865	0.00875	0.0037	0.01465	0.01095		0.0053	0.0055	0.0009	0.0117		0.0054	0.0055	0.0006	0.0118		0.00535	0.0055	0.00075	0.01175
183		t_n528		0.0065	0.0066	0.0037	0.0105		0.0067	0.0069	0.0036	0.0111		0.0066	0.00675	0.00365	0.0108	0.00715		0.0057	0.0058	0.0032	0.0092		0.0057	0.0058	0.0033	0.0091		0.0057	0.0058	0.00325	0.00915	0.0059		0.0069	0.0071	0.0038	0.0111		0.0073	0.0075	0.0039	0.0118		0.0071	0.0073	0.00385	0.01145
184		t_n529		0.132	0.133	0.1185	0.1515		0.1327	0.1342	0.1186	0.156		0.13235	0.1336	0.11855	0.15375	0.0352		0.1301	0.1302	0.1174	0.1442		0.1311	0.131	0.1172	0.1445		0.1306	0.1306	0.1173	0.14435	0.02705		0.1431	0.1432	0.1289	0.1592		0.1479	0.1489	0.13	0.1741		0.1455	0.14605	0.12945	0.16665
185		t_n530		0.1111	0.112	0.0968	0.1312		0.1119	0.1129	0.0967	0.1348		0.1115	0.11245	0.09675	0.133	0.03625		0.1087	0.109	0.0956	0.1231		0.1094	0.1096	0.096	0.1235		0.10905	0.1093	0.0958	0.1233	0.0275		0.1206	0.1208	0.1059	0.1374		0.1244	0.1253	0.1063	0.1493		0.1225	0.12305	0.1061	0.14335
186		t_n531		0.0482	0.0488	0.0406	0.0597		0.0491	0.0496	0.0405	0.0614		0.04865	0.0492	0.04055	0.06055	0.02		0.0443	0.0448	0.0375	0.0542		0.0448	0.0452	0.038	0.0545		0.04455	0.045	0.03775	0.05435	0.0166		0.0524	0.0526	0.044	0.0621		0.054	0.0546	0.0444	0.0686		0.0532	0.0536	0.0442	0.06535
187		t_n532		0.0383	0.0388	0.032	0.0485		0.0385	0.0393	0.0318	0.0498		0.0384	0.03905	0.0319	0.04915	0.01725		0.036	0.0371	0.0307	0.0464		0.0365	0.0375	0.031	0.047		0.03625	0.0373	0.03085	0.0467	0.01585		0.0416	0.042	0.0348	0.0508		0.0426	0.0432	0.035	0.0547		0.0421	0.0426	0.0349	0.05275
188		t_n533		0.0254	0.0259	0.0164	0.0379		0.0257	0.0263	0.0166	0.0391		0.02555	0.0261	0.0165	0.0385	0.022		0.0251	0.0251	0.0151	0.0347		0.0254	0.0255	0.0161	0.0348		0.02525	0.0253	0.0156	0.03475	0.01915		0.028	0.0283	0.0178	0.0399		0.0286	0.0292	0.0185	0.0423		0.0283	0.02875	0.01815	0.0411
189		t_n534		0.017	0.0172	0.0126	0.0229		0.0173	0.0175	0.0124	0.0238		0.01715	0.01735	0.0125	0.02335	0.01085		0.0157	0.0158	0.0112	0.021		0.016	0.0161	0.0112	0.0214		0.01585	0.01595	0.0112	0.0212	0.01		0.0187	0.0188	0.0136	0.0246		0.0188	0.019	0.0136	0.0261		0.01875	0.0189	0.0136	0.02535
190		t_n535		0.0039	0.0047	0.0005	0.0144		0.0038	0.0045	0.0013	0.0129		0.00385	0.0046	0.0009	0.01365	0.01275		0.0094	0.0093	0.0025	0.0163		0.0095	0.0097	0.0036	0.017		0.00945	0.0095	0.00305	0.01665	0.0136		0.0041	0.0047	0.0011	0.0133		0.0037	0.0045	0.0008	0.0143		0.0039	0.0046	0.00095	0.0138
191		t_n536		0.0013	0.0017	0.0001	0.0055		0.0013	0.0018	0.0001	0.0062		0.0013	0.00175	0.0001	0.00585	0.00575		0.0027	0.0035	0.0002	0.0111		0.0029	0.0038	0.0004	0.0121		0.0028	0.00365	0.0003	0.0116	0.0113		0.0012	0.0017	0	0.0056		0.0011	0.0017	0.0001	0.0064		0.00115	0.0017	5e-05	0.006
192		t_n537		0.0265	0.0267	0.0198	0.0351		0.0268	0.0272	0.0198	0.0364		0.02665	0.02695	0.0198	0.03575	0.01595		0.028	0.0281	0.0214	0.0347		0.0283	0.0284	0.0215	0.035		0.02815	0.02825	0.02145	0.03485	0.0134		0.0284	0.0287	0.0215	0.0371		0.0296	0.0298	0.0217	0.0394		0.029	0.02925	0.0216	0.03825
193		t_n538		0.01	0.0101	0.0067	0.0147		0.0103	0.0106	0.0063	0.0159		0.01015	0.01035	0.0065	0.0153	0.0088		0.0086	0.0087	0.006	0.0118		0.0088	0.0089	0.0062	0.012		0.0087	0.0088	0.0061	0.0119	0.0058		0.011	0.0111	0.0072	0.0159		0.0112	0.0116	0.0074	0.0177		0.0111	0.01135	0.0073	0.0168
194		t_n539		0.0083	0.0084	0.0051	0.0122		0.0086	0.0088	0.0051	0.0134		0.00845	0.0086	0.0051	0.0128	0.0077		0.0079	0.0079	0.0052	0.011		0.008	0.0081	0.0054	0.0113		0.00795	0.008	0.0053	0.01115	0.00585		0.0092	0.0093	0.0055	0.0133		0.0095	0.0096	0.0058	0.0147		0.00935	0.00945	0.00565	0.014
195		t_n540		0.005	0.0052	0.0018	0.0095		0.0054	0.0056	0.0018	0.0105		0.0052	0.0054	0.0018	0.01	0.0082		0.0046	0.0047	0.0025	0.0074		0.0047	0.0048	0.0024	0.0076		0.00465	0.00475	0.00245	0.0075	0.00505		0.0058	0.0059	0.002	0.0103		0.006	0.0062	0.0022	0.0113		0.0059	0.00605	0.0021	0.0108
196		t_n541		0.005	0.0051	0.0025	0.0086		0.0049	0.0051	0.0023	0.009		0.00495	0.0051	0.0024	0.0088	0.0064		0.0045	0.0046	0.0023	0.0074		0.0046	0.0047	0.0025	0.0076		0.00455	0.00465	0.0024	0.0075	0.0051		0.0052	0.0054	0.0026	0.0091		0.0055	0.0057	0.0028	0.0098		0.00535	0.00555	0.0027	0.00945
197		t_n542		0.0011	0.0012	0.0001	0.0033		0.0012	0.0014	0.0001	0.0034		0.00115	0.0013	0.0001	0.00335	0.00325		0.0013	0.0015	0	0.0041		0.0013	0.0015	0.0001	0.004		0.0013	0.0015	5e-05	0.00405	0.004		0.0011	0.0012	0	0.0033		0.0012	0.0013	0	0.0034		0.00115	0.00125	0	0.00335
198		t_n543		0.1649	0.1655	0.1445	0.1885		0.1653	0.1667	0.1454	0.1941		0.1651	0.1661	0.14495	0.1913	0.04635		0.1356	0.1358	0.1181	0.1547		0.1366	0.1369	0.1198	0.1561		0.1361	0.13635	0.11895	0.1554	0.03645		0.1789	0.179	0.1578	0.2004		0.1842	0.1857	0.1595	0.218		0.18155	0.18235	0.15865	0.2092
199		t_n544		0.1272	0.1277	0.1105	0.1476		0.1276	0.1288	0.1106	0.1519		0.1274	0.12825	0.11055	0.14975	0.0392		0.096	0.096	0.0815	0.1114		0.0973	0.0977	0.0824	0.114		0.09665	0.09685	0.08195	0.1127	0.03075		0.1383	0.1384	0.1208	0.1563		0.1422	0.1432	0.1221	0.1694		0.14025	0.1408	0.12145	0.16285
200		t_n545		0.0336	0.0338	0.0266	0.0428		0.0341	0.0342	0.027	0.0427		0.03385	0.034	0.0268	0.04275	0.01595		0.0225	0.0226	0.0177	0.0283		0.0228	0.0229	0.0179	0.0289		0.02265	0.02275	0.0178	0.0286	0.0108		0.036	0.0362	0.0285	0.0452		0.0376	0.0381	0.0291	0.05		0.0368	0.03715	0.0288	0.0476
201		t_n546		0.0132	0.0133	0.0084	0.0189		0.0133	0.0134	0.0086	0.0191		0.01325	0.01335	0.0085	0.019	0.0105		0.0076	0.0078	0.0048	0.0119		0.0077	0.0079	0.0046	0.0115		0.00765	0.00785	0.0047	0.0117	0.007		0.0139	0.014	0.009	0.0196		0.0146	0.0147	0.0092	0.021		0.01425	0.01435	0.0091	0.0203
202		t_n547		0.0055	0.0059	0.0006	0.0138		0.0059	0.0061	0.0005	0.0131		0.0057	0.006	0.00055	0.01345	0.0129		0.0038	0.004	0.0011	0.0086		0.0036	0.0037	0.0004	0.0079		0.0037	0.00385	0.00075	0.00825	0.0075		0.0058	0.0062	0.0008	0.0136		0.007	0.0073	0.0016	0.0149		0.0064	0.00675	0.0012	0.01425
203		t_n548		0.0241	0.0242	0.0191	0.0301		0.0246	0.0247	0.0193	0.0309		0.02435	0.02445	0.0192	0.0305	0.0113		0.0138	0.0139	0.0104	0.0179		0.0141	0.0142	0.0108	0.0182		0.01395	0.01405	0.0106	0.01805	0.00745		0.0259	0.026	0.0207	0.0324		0.0269	0.0272	0.021	0.0349		0.0264	0.0266	0.02085	0.03365
204		t_n549		0.0234	0.0235	0.0186	0.0293		0.0238	0.0239	0.0186	0.0303		0.0236	0.0237	0.0186	0.0298	0.0112		0.0134	0.0135	0.01	0.0175		0.0137	0.0138	0.0104	0.0177		0.01355	0.01365	0.0102	0.0176	0.0074		0.0251	0.0252	0.0201	0.0315		0.0261	0.0264	0.0203	0.034		0.0256	0.0258	0.0202	0.03275
205		t_n550		0.0171	0.0171	0.0118	0.0229		0.0173	0.0175	0.0115	0.0245		0.0172	0.0173	0.01165	0.0237	0.01205		0.0077	0.0078	0.0047	0.0114		0.0079	0.008	0.0049	0.0117		0.0078	0.0079	0.0048	0.01155	0.00675		0.018	0.0181	0.0122	0.0244		0.0186	0.0187	0.0124	0.0258		0.0183	0.0184	0.0123	0.0251
206		t_n551		0.1085	0.1089	0.0914	0.1297		0.1086	0.1094	0.0907	0.1311		0.10855	0.10915	0.09105	0.1304	0.03935		0.0844	0.0845	0.0697	0.1001		0.0857	0.0859	0.0705	0.1025		0.08505	0.0852	0.0701	0.1013	0.0312		0.1183	0.1183	0.0997	0.1367		0.1218	0.1224	0.1011	0.1465		0.12005	0.12035	0.1004	0.1416
207		t_n552		0.0327	0.0328	0.0183	0.0498		0.0331	0.0334	0.0187	0.0534		0.0329	0.0331	0.0185	0.0516	0.0331		0.0221	0.0224	0.0148	0.0315		0.0221	0.0224	0.0146	0.0316		0.0221	0.0224	0.0147	0.03155	0.01685		0.035	0.0351	0.0207	0.0525		0.0366	0.0369	0.0216	0.0556		0.0358	0.036	0.02115	0.05405
208		t_n553		0.0088	0.0101	0.004	0.0255		0.0087	0.0097	0.0043	0.0219		0.00875	0.0099	0.00415	0.0237	0.01955		0.0102	0.0118	0.0043	0.0293		0.01	0.0118	0.0041	0.029		0.0101	0.0118	0.0042	0.02915	0.02495		0.0091	0.0099	0.0044	0.0208		0.01	0.011	0.0048	0.0229		0.00955	0.01045	0.0046	0.02185
209		t_n554		0.0054	0.0056	0.0027	0.0093		0.0054	0.0055	0.0028	0.0093		0.0054	0.00555	0.00275	0.0093	0.00655		0.004	0.0041	0.002	0.0067		0.0042	0.0044	0.0021	0.0073		0.0041	0.00425	0.00205	0.007	0.00495		0.0058	0.0059	0.0029	0.0094		0.0062	0.0063	0.0031	0.0104		0.006	0.0061	0.003	0.0099
210		t_n555		0.0037	0.0039	0.001	0.0077		0.0037	0.0038	0.0006	0.0076		0.0037	0.00385	0.0008	0.00765	0.00685		0.003	0.003	0.0008	0.0057		0.0032	0.0034	0.0012	0.0062		0.0031	0.0032	0.001	0.00595	0.00495		0.0038	0.004	0.0013	0.0075		0.0044	0.0045	0.0012	0.0085		0.0041	0.00425	0.00125	0.008
211		t_n556		0.0405	0.041	0.034	0.0509		0.04	0.0406	0.0336	0.0503		0.04025	0.0408	0.0338	0.0506	0.0168		0.0339	0.0339	0.0291	0.0402		0.034	0.0341	0.0293	0.0403		0.03395	0.034	0.0292	0.04025	0.01105		0.0431	0.0435	0.036	0.0531		0.0444	0.045	0.0363	0.0569		0.04375	0.04425	0.03615	0.055
212		t_n557		0.025	0.0251	0.0158	0.0351		0.0248	0.0251	0.0154	0.0356		0.0249	0.0251	0.0156	0.03535	0.01975		0.0191	0.0192	0.0086	0.0304		0.0184	0.0186	0.008	0.0303		0.01875	0.0189	0.0083	0.03035	0.02205		0.0267	0.0267	0.0159	0.0379		0.0273	0.0275	0.0169	0.0394		0.027	0.0271	0.0164	0.03865
213		t_n558		0.0034	0.0037	0.0005	0.0088		0.0029	0.0035	0.0007	0.0086		0.00315	0.0036	0.0006	0.0087	0.0081		0.0039	0.0047	0.0004	0.0136		0.0034	0.004	0.0007	0.0109		0.00365	0.00435	0.00055	0.01225	0.0117		0.0036	0.0039	0.0007	0.0091		0.0035	0.004	0.0006	0.0107		0.00355	0.00395	0.00065	0.0099
214		t_n559		0.0362	0.0366	0.0306	0.0449		0.0359	0.0363	0.0302	0.0438		0.03605	0.03645	0.0304	0.04435	0.01395		0.0292	0.0292	0.0243	0.0344		0.0292	0.0293	0.0246	0.0345		0.0292	0.02925	0.02445	0.03445	0.01		0.0387	0.0389	0.0325	0.047		0.0399	0.0402	0.0327	0.05		0.0393	0.03955	0.0326	0.0485
215		t_n560		0.0333	0.0336	0.0271	0.0415		0.033	0.0332	0.0268	0.0409		0.03315	0.0334	0.02695	0.0412	0.01425		0.0265	0.0265	0.0215	0.0319		0.0264	0.0265	0.0216	0.0321		0.02645	0.0265	0.02155	0.032	0.01045		0.0355	0.0356	0.0291	0.0429		0.0366	0.0368	0.0291	0.0464		0.03605	0.0362	0.0291	0.04465
216		t_n561		0.0302	0.0301	0.022	0.0382		0.03	0.0299	0.0217	0.0382		0.0301	0.03	0.02185	0.0382	0.01635		0.0209	0.0206	0.0111	0.0285		0.0211	0.0208	0.0118	0.0286		0.021	0.0207	0.01145	0.02855	0.0171		0.032	0.0319	0.0236	0.0398		0.0327	0.0326	0.0233	0.0421		0.03235	0.03225	0.02345	0.04095
217		t_n562		0.0004	0.0007	0.0001	0.0029		0.0005	0.0007	0.0001	0.0026		0.00045	0.0007	0.0001	0.00275	0.00265		0.0002	0.0005	0	0.0023		0.0003	0.0006	0	0.0027		0.00025	0.00055	0	0.0025	0.0025		0.0005	0.0007	0.0001	0.0025		0.0005	0.0008	0	0.0035		0.0005	0.00075	5e-05	0.003
218		t_n563		0.0277	0.0276	0.0162	0.0387		0.0276	0.0273	0.0162	0.0372		0.02765	0.02745	0.0162	0.03795	0.02175		0.0226	0.022	0.0101	0.0311		0.0225	0.0218	0.0089	0.0313		0.02255	0.0219	0.0095	0.0312	0.0217		0.0299	0.0296	0.0172	0.0409		0.0307	0.0306	0.0175	0.0432		0.0303	0.0301	0.01735	0.04205
219	219	t_n564		0.2696	0.2708	0.2439	0.3022		0.268	0.27	0.2438	0.3049		0.2688	0.2704	0.24385	0.30355	0.0597		0.2241	0.2264	0.2071	0.2567		0.2246	0.2269	0.2072	0.2588		0.22435	0.22665	0.20715	0.25775	0.0506		0.2942	0.2944	0.2663	0.3245		0.3022	0.3021	0.2683	0.3343		0.2982	0.29825	0.2673	0.3294
220	220	t_n565		0.198	0.1981	0.1696	0.2251		0.1966	0.1973	0.1704	0.2293		0.1973	0.1977	0.17	0.2272	0.0572		0.147	0.148	0.1347	0.1676		0.1484	0.149	0.135	0.1669		0.1477	0.1485	0.13485	0.16725	0.0324		0.2149	0.2139	0.187	0.2379		0.2208	0.2203	0.1869	0.2477		0.21785	0.2171	0.18695	0.2428
221		t_n566		0.0735	0.0742	0.0613	0.0908		0.0736	0.074	0.0611	0.0889		0.07355	0.0741	0.0612	0.08985	0.02865		0.0568	0.0597	0.0458	0.0883		0.0569	0.059	0.0468	0.0863		0.05685	0.05935	0.0463	0.0873	0.041		0.0784	0.0787	0.0659	0.0935		0.0809	0.0811	0.066	0.097		0.07965	0.0799	0.06595	0.09525
222		t_n567		0.0672	0.0678	0.0565	0.082		0.0674	0.0676	0.0568	0.0797		0.0673	0.0677	0.05665	0.08085	0.0242		0.0478	0.0478	0.0393	0.0565		0.0481	0.0481	0.0402	0.0561		0.04795	0.04795	0.03975	0.0563	0.01655		0.0718	0.0718	0.0606	0.0834		0.074	0.074	0.0606	0.087		0.0729	0.0729	0.0606	0.0852
223		t_n568		0.0269	0.0273	0.0192	0.0369		0.0274	0.0276	0.0191	0.0372		0.02715	0.02745	0.01915	0.03705	0.0179		0.0256	0.0256	0.0141	0.036		0.0262	0.026	0.0145	0.0354		0.0259	0.0258	0.0143	0.0357	0.0214		0.0289	0.0291	0.0201	0.0398		0.0296	0.03	0.0206	0.0414		0.02925	0.02955	0.02035	0.0406
224		t_n569		0.0197	0.02	0.0124	0.0296		0.0198	0.0202	0.0123	0.0299		0.01975	0.0201	0.01235	0.02975	0.0174		0.0161	0.0166	0.0075	0.029		0.0171	0.0173	0.0072	0.0286		0.0166	0.01695	0.00735	0.0288	0.02145		0.0212	0.0214	0.0127	0.0316		0.0219	0.0223	0.0136	0.0332		0.02155	0.02185	0.01315	0.0324
225		t_n570		0.0134	0.0136	0.0102	0.0179		0.0135	0.0136	0.0103	0.0177		0.01345	0.0136	0.01025	0.0178	0.00755		0.0081	0.0082	0.0058	0.0109		0.0083	0.0084	0.0059	0.0114		0.0082	0.0083	0.00585	0.01115	0.0053		0.0143	0.0144	0.011	0.0186		0.0146	0.0147	0.0109	0.0191		0.01445	0.01455	0.01095	0.01885
226		t_n571		0.009	0.0091	0.0066	0.0123		0.0091	0.0092	0.0066	0.0123		0.00905	0.00915	0.0066	0.0123	0.0057		0.0062	0.0062	0.0041	0.0086		0.0063	0.0064	0.0043	0.009		0.00625	0.0063	0.0042	0.0088	0.0046		0.0096	0.0097	0.0069	0.0129		0.0098	0.0099	0.0069	0.0135		0.0097	0.0098	0.0069	0.0132
227		t_n572		0.0035	0.0035	0.002	0.0054		0.0035	0.0036	0.0021	0.0055		0.0035	0.00355	0.00205	0.00545	0.0034		0.0025	0.0026	0.0012	0.0043		0.0027	0.0027	0.0013	0.0044		0.0026	0.00265	0.00125	0.00435	0.0031		0.0037	0.0038	0.0021	0.006		0.0038	0.0039	0.0021	0.0061		0.00375	0.00385	0.0021	0.00605
228		t_n573		0.0607	0.0612	0.0505	0.0749		0.0607	0.061	0.0507	0.0732		0.0607	0.0611	0.0506	0.07405	0.02345		0.0437	0.0438	0.035	0.0522		0.0439	0.044	0.0356	0.0524		0.0438	0.0439	0.0353	0.0523	0.017		0.0647	0.0647	0.0538	0.0764		0.0666	0.0667	0.054	0.0796		0.06565	0.0657	0.0539	0.078
229		t_n574		0.0375	0.0381	0.0306	0.0485		0.0372	0.0378	0.0305	0.0475		0.03735	0.03795	0.03055	0.048	0.01745		0.0248	0.0252	0.0193	0.0333		0.0248	0.0251	0.0185	0.0333		0.0248	0.02515	0.0189	0.0333	0.0144		0.0396	0.0401	0.0323	0.0507		0.041	0.0414	0.0331	0.0524		0.0403	0.04075	0.0327	0.05155
230		t_n575		0.0268	0.027	0.0213	0.0344		0.0266	0.027	0.0217	0.0336		0.0267	0.027	0.0215	0.034	0.0125		0.019	0.0191	0.0152	0.0235		0.0189	0.0189	0.0148	0.0238		0.01895	0.019	0.015	0.02365	0.00865		0.0281	0.0282	0.0224	0.0346		0.0289	0.0291	0.0224	0.0363		0.0285	0.02865	0.0224	0.03545
231		t_n576		0.0116	0.0118	0.0027	0.0225		0.0115	0.0117	0.0034	0.0217		0.01155	0.01175	0.00305	0.0221	0.01905		0.0071	0.0076	0.0013	0.0166		0.0062	0.0069	0.0011	0.0162		0.00665	0.00725	0.0012	0.0164	0.0152		0.0131	0.0133	0.0039	0.0237		0.0131	0.0133	0.004	0.0244		0.0131	0.0133	0.00395	0.02405
232		t_n577		0.0241	0.0243	0.0191	0.031		0.0239	0.0243	0.0196	0.0305		0.024	0.0243	0.01935	0.03075	0.0114		0.0165	0.0167	0.0127	0.0211		0.0164	0.0165	0.0124	0.0213		0.01645	0.0166	0.01255	0.0212	0.00865		0.0253	0.0254	0.0201	0.0315		0.026	0.0262	0.0203	0.0328		0.02565	0.0258	0.0202	0.03215
233		t_n578		0.0197	0.0198	0.0142	0.0263		0.0196	0.0198	0.0147	0.0261		0.01965	0.0198	0.01445	0.0262	0.01175		0.0137	0.0138	0.0101	0.0181		0.0136	0.0136	0.0096	0.0182		0.01365	0.0137	0.00985	0.01815	0.0083		0.0204	0.0204	0.0148	0.0265		0.0211	0.0212	0.0147	0.0279		0.02075	0.0208	0.01475	0.0272
234		t_n579		0.0181	0.0183	0.0126	0.025		0.0182	0.0183	0.0129	0.0247		0.01815	0.0183	0.01275	0.02485	0.0121		0.0132	0.0133	0.0087	0.0184		0.0129	0.013	0.0084	0.0181		0.01305	0.01315	0.00855	0.01825	0.0097		0.0189	0.0189	0.0131	0.0254		0.0194	0.0195	0.0128	0.0266		0.01915	0.0192	0.01295	0.026
235		t_n580		0.023	0.0237	0.0085	0.0429		0.0249	0.0251	0.0088	0.0436		0.02395	0.0244	0.00865	0.04325	0.0346		0.0125	0.0143	0.0035	0.0328		0.0126	0.0137	0.0026	0.0302		0.01255	0.014	0.00305	0.0315	0.02845		0.0265	0.0266	0.0091	0.0479		0.0244	0.0251	0.0081	0.0453		0.02545	0.02585	0.0086	0.0466
236	236	t_n581		0.1656	0.1654	0.1376	0.1939		0.1647	0.1654	0.1387	0.1982		0.16515	0.1654	0.13815	0.19605	0.0579		0.129	0.1299	0.1176	0.1475		0.1303	0.1309	0.1181	0.1476		0.12965	0.1304	0.11785	0.14755	0.0297		0.1812	0.1806	0.1553	0.2047		0.1855	0.1855	0.1526	0.2153		0.18335	0.18305	0.15395	0.21
237		t_n582		0.0188	0.0195	0.01	0.0326		0.0185	0.019	0.0092	0.0315		0.01865	0.01925	0.0096	0.03205	0.02245		0.0098	0.0099	0.0065	0.0141		0.0096	0.0097	0.0064	0.0138		0.0097	0.0098	0.00645	0.01395	0.0075		0.0179	0.0185	0.0095	0.0318		0.019	0.0198	0.0099	0.0337		0.01845	0.01915	0.0097	0.03275
238		t_n583		0.0921	0.092	0.0722	0.1119		0.091	0.0915	0.0727	0.1144		0.09155	0.09175	0.07245	0.11315	0.0407		0.0658	0.0663	0.0577	0.0779		0.0671	0.0671	0.058	0.0781		0.06645	0.0667	0.05785	0.078	0.02015		0.0987	0.0983	0.0794	0.117		0.1015	0.1013	0.0803	0.1209		0.1001	0.0998	0.07985	0.11895
239		t_n584		0.0218	0.022	0.0046	0.0406		0.0201	0.0199	0.0009	0.0401		0.02095	0.02095	0.00275	0.04035	0.0376		0.0136	0.0147	0.0012	0.0332		0.014	0.0154	0.0036	0.0332		0.0138	0.01505	0.0024	0.0332	0.0308		0.0222	0.0228	0.0052	0.0441		0.0231	0.0239	0.0067	0.0446		0.02265	0.02335	0.00595	0.04435
240	240	t_n585		0.0741	0.074	0.0577	0.0909		0.0736	0.0739	0.0584	0.0937		0.07385	0.07395	0.05805	0.0923	0.03425		0.0559	0.0569	0.0513	0.0672		0.0571	0.0575	0.0513	0.0672		0.0565	0.0572	0.0513	0.0672	0.0159		0.0804	0.0801	0.0647	0.0948		0.0824	0.0825	0.065	0.0996		0.0814	0.0813	0.06485	0.0972
241		t_n586		0.0208	0.0215	0.0121	0.0344		0.0203	0.0208	0.0117	0.0334		0.02055	0.02115	0.0119	0.0339	0.022		0.0111	0.0113	0.0073	0.0162		0.0111	0.0113	0.0075	0.0159		0.0111	0.0113	0.0074	0.01605	0.00865		0.0209	0.0215	0.0122	0.0343		0.0217	0.0221	0.0119	0.0345		0.0213	0.0218	0.01205	0.0344
242	242	t_n587		0.1553	0.1564	0.1377	0.1821		0.1531	0.1547	0.1373	0.179		0.1542	0.15555	0.1375	0.18055	0.04305		0.1144	0.1149	0.1032	0.1295		0.115	0.1154	0.1031	0.1303		0.1147	0.11515	0.10315	0.1299	0.02675		0.165	0.1651	0.146	0.1853		0.1711	0.1719	0.1521	0.1961		0.16805	0.1685	0.14905	0.1907
243		t_n588		0.1004	0.1015	0.0889	0.119		0.0986	0.1001	0.0885	0.1175		0.0995	0.1008	0.0887	0.11825	0.02955		0.0793	0.0795	0.0713	0.0892		0.0797	0.08	0.0719	0.0894		0.0795	0.07975	0.0716	0.0893	0.0177		0.1072	0.1074	0.0944	0.1216		0.1113	0.1117	0.0982	0.1287		0.10925	0.10955	0.0963	0.12515
244		t_n589		0.0793	0.08	0.0693	0.0945		0.0776	0.0788	0.069	0.0935		0.07845	0.0794	0.06915	0.094	0.02485		0.06	0.0605	0.0536	0.0699		0.0602	0.0608	0.0537	0.0706		0.0601	0.06065	0.05365	0.07025	0.0166		0.0837	0.084	0.0728	0.0965		0.0871	0.0876	0.0765	0.1029		0.0854	0.0858	0.07465	0.0997
245		t_n590		0.0711	0.0716	0.0598	0.0859		0.0697	0.0705	0.0601	0.0844		0.0704	0.07105	0.05995	0.08515	0.0252		0.0539	0.0536	0.0437	0.0624		0.0541	0.0537	0.043	0.0634		0.054	0.05365	0.04335	0.0629	0.01955		0.0754	0.0753	0.0632	0.0875		0.0784	0.0787	0.0665	0.0926		0.0769	0.077	0.06485	0.09005
246		t_n591		0.0363	0.0368	0.0285	0.0474		0.0357	0.0361	0.028	0.0468		0.036	0.03645	0.02825	0.0471	0.01885		0.0336	0.034	0.0257	0.0459		0.0336	0.0337	0.0253	0.0452		0.0336	0.03385	0.0255	0.04555	0.02005		0.0382	0.0383	0.0294	0.0478		0.0393	0.0397	0.0303	0.0508		0.03875	0.039	0.02985	0.0493
247		t_n592		0.0329	0.0331	0.0253	0.0425		0.0322	0.0324	0.0248	0.0413		0.03255	0.03275	0.02505	0.0419	0.01685		0.0301	0.0302	0.0221	0.0398		0.0301	0.0299	0.0214	0.0389		0.0301	0.03005	0.02175	0.03935	0.0176		0.0344	0.0344	0.0261	0.0421		0.0356	0.0358	0.027	0.0458		0.035	0.0351	0.02655	0.04395
248		t_n593		0.0161	0.0165	0.0108	0.0242		0.0158	0.0161	0.0106	0.0234		0.01595	0.0163	0.0107	0.0238	0.0131		0.0201	0.0203	0.0127	0.0291		0.0196	0.0197	0.0119	0.028		0.01985	0.02	0.0123	0.02855	0.01625		0.0168	0.0169	0.0112	0.0238		0.0173	0.0175	0.0112	0.0255		0.01705	0.0172	0.0112	0.02465
249		t_n594		0.0094	0.0096	0.0062	0.0143		0.0092	0.0093	0.0059	0.0138		0.0093	0.00945	0.00605	0.01405	0.008		0.0119	0.0125	0.0059	0.0218		0.0117	0.0119	0.0058	0.0198		0.0118	0.0122	0.00585	0.0208	0.01495		0.0097	0.0098	0.0063	0.0142		0.0099	0.0102	0.0064	0.0152		0.0098	0.01	0.00635	0.0147
250		t_n595		0.0069	0.0071	0.0038	0.0112		0.0068	0.0069	0.0038	0.0111		0.00685	0.007	0.0038	0.01115	0.00735		0.0083	0.009	0.0032	0.0179		0.0078	0.0083	0.0032	0.016		0.00805	0.00865	0.0032	0.01695	0.01375		0.0071	0.0072	0.004	0.0113		0.0073	0.0075	0.0039	0.0121		0.0072	0.00735	0.00395	0.0117
251		t_n596		0.0079	0.0081	0.0042	0.0134		0.0075	0.0077	0.0037	0.0126		0.0077	0.0079	0.00395	0.013	0.00905		0.01	0.0106	0.0035	0.0206		0.0093	0.0098	0.0035	0.0189		0.00965	0.0102	0.0035	0.01975	0.01625		0.0081	0.0082	0.0042	0.013		0.0084	0.0086	0.0044	0.0141		0.00825	0.0084	0.0043	0.01355
252		t_n597		0.0265	0.0266	0.0177	0.0366		0.0259	0.0261	0.0173	0.0362		0.0262	0.02635	0.0175	0.0364	0.0189		0.0225	0.0225	0.012	0.0325		0.0226	0.0224	0.0117	0.0321		0.02255	0.02245	0.01185	0.0323	0.02045		0.0277	0.0275	0.018	0.037		0.0283	0.0286	0.0185	0.0399		0.028	0.02805	0.01825	0.03845
253		t_n598		0.0039	0.0042	0.0016	0.0089		0.0037	0.004	0.0016	0.0084		0.0038	0.0041	0.0016	0.00865	0.00705		0.0037	0.0044	0.0011	0.0116		0.0035	0.0041	0.0011	0.0112		0.0036	0.00425	0.0011	0.0114	0.0103		0.0042	0.0045	0.0015	0.0096		0.0045	0.0049	0.0018	0.0103		0.00435	0.0047	0.00165	0.00995
254		t_n599		0.0429	0.0437	0.0318	0.0602		0.0411	0.0423	0.031	0.0587		0.042	0.043	0.0314	0.05945	0.02805		0.0324	0.033	0.0233	0.0487		0.0324	0.033	0.0238	0.0478		0.0324	0.033	0.02355	0.04825	0.0247		0.045	0.0458	0.0332	0.0628		0.047	0.0479	0.0348	0.0653		0.046	0.04685	0.034	0.06405
255		t_n600		0.0258	0.0262	0.0202	0.0341		0.0251	0.0255	0.0198	0.033		0.02545	0.02585	0.02	0.03355	0.01355		0.0205	0.0206	0.0157	0.0261		0.0207	0.0209	0.0159	0.0267		0.0206	0.02075	0.0158	0.0264	0.0106		0.0273	0.0275	0.0212	0.0351		0.0284	0.0287	0.0222	0.0367		0.02785	0.0281	0.0217	0.0359
256		t_n601		0.0168	0.0171	0.0117	0.0237		0.0162	0.0166	0.0117	0.0231		0.0165	0.01685	0.0117	0.0234	0.0117		0.0154	0.0155	0.011	0.0205		0.0156	0.0157	0.0111	0.021		0.0155	0.0156	0.01105	0.02075	0.0097		0.018	0.0182	0.0128	0.0247		0.0188	0.019	0.0135	0.0257		0.0184	0.0186	0.01315	0.0252
257		t_n602		0.0016	0.0017	0.0006	0.0035		0.0015	0.0017	0.0006	0.0036		0.00155	0.0017	0.0006	0.00355	0.00295		0.0026	0.0031	0.0008	0.0084		0.0028	0.0032	0.0008	0.0083		0.0027	0.00315	0.0008	0.00835	0.00755		0.0019	0.002	0.0007	0.0041		0.0016	0.0018	0.0006	0.004		0.00175	0.0019	0.00065	0.00405
258		t_n603		0.0786	0.0796	0.0694	0.0943		0.0768	0.0781	0.0687	0.0919		0.0777	0.07885	0.06905	0.0931	0.02405		0.0578	0.0582	0.053	0.0657		0.0581	0.0584	0.0535	0.0651		0.05795	0.0583	0.05325	0.0654	0.01215		0.0831	0.0833	0.0727	0.095		0.0865	0.087	0.0764	0.1021		0.0848	0.08515	0.07455	0.09855
259		t_n604		0.0083	0.0085	0.0046	0.0139		0.0084	0.0086	0.0047	0.0142		0.00835	0.00855	0.00465	0.01405	0.0094		0.0075	0.0077	0.0046	0.0117		0.0076	0.0077	0.0045	0.012		0.00755	0.0077	0.00455	0.01185	0.0073		0.0085	0.0088	0.0046	0.0142		0.0091	0.0093	0.005	0.015		0.0088	0.00905	0.0048	0.0146
260		t_n605		0.076	0.0769	0.0667	0.0911		0.0741	0.0754	0.0664	0.089		0.07505	0.07615	0.06655	0.09005	0.0235		0.0561	0.0565	0.0512	0.0635		0.0565	0.0567	0.0516	0.063		0.0563	0.0566	0.0514	0.06325	0.01185		0.0803	0.0805	0.0706	0.0918		0.0836	0.0841	0.0735	0.0987		0.08195	0.0823	0.07205	0.09525
261		t_n606		0.0629	0.0636	0.0544	0.0762		0.0613	0.0623	0.0541	0.0741		0.0621	0.06295	0.05425	0.07515	0.0209		0.0462	0.0464	0.0405	0.0535		0.0464	0.0464	0.0405	0.0527		0.0463	0.0464	0.0405	0.0531	0.0126		0.0663	0.0664	0.0571	0.0768		0.069	0.0694	0.06	0.0822		0.06765	0.0679	0.05855	0.0795
262		t_n607		0.028	0.0283	0.0206	0.0376		0.0276	0.0278	0.0203	0.0369		0.0278	0.02805	0.02045	0.03725	0.0168		0.0266	0.0264	0.0173	0.0344		0.0262	0.0264	0.0178	0.0349		0.0264	0.0264	0.01755	0.03465	0.0171		0.0303	0.0303	0.0219	0.0391		0.0313	0.0314	0.0223	0.041		0.0308	0.03085	0.0221	0.04005
263		t_n608		0.0256	0.0258	0.0189	0.0343		0.0251	0.0253	0.0186	0.0335		0.02535	0.02555	0.01875	0.0339	0.01515		0.0229	0.023	0.0146	0.0315		0.0226	0.0229	0.0151	0.032		0.02275	0.02295	0.01485	0.03175	0.0169		0.0274	0.0275	0.0201	0.0358		0.0284	0.0285	0.0204	0.0374		0.0279	0.028	0.02025	0.0366
264		t_n609		0.022	0.0223	0.0154	0.0309		0.0215	0.0218	0.0149	0.03		0.02175	0.02205	0.01515	0.03045	0.0153		0.0174	0.0175	0.0097	0.0261		0.0172	0.0174	0.0102	0.0259		0.0173	0.01745	0.00995	0.026	0.01605		0.0235	0.0237	0.016	0.0323		0.0244	0.0245	0.0164	0.0337		0.02395	0.0241	0.0162	0.033
265		t_n610		0.059	0.0596	0.0508	0.0718		0.0575	0.0584	0.0503	0.07		0.05825	0.059	0.05055	0.0709	0.02035		0.044	0.0442	0.0382	0.0514		0.0443	0.0443	0.0381	0.0506		0.04415	0.04425	0.03815	0.051	0.01285		0.0623	0.0624	0.0535	0.0723		0.0647	0.0651	0.0559	0.0773		0.0635	0.06375	0.0547	0.0748
266		t_n611		0.0248	0.0249	0.012	0.0381		0.0242	0.0243	0.0119	0.0374		0.0245	0.0246	0.01195	0.03775	0.0258		0.0198	0.02	0.0098	0.0318		0.0198	0.0202	0.0099	0.0321		0.0198	0.0201	0.00985	0.03195	0.0221		0.0259	0.0258	0.0125	0.0386		0.0266	0.027	0.0139	0.0417		0.02625	0.0264	0.0132	0.04015
267		t_n612		0.0197	0.0201	0.0117	0.0304		0.0191	0.0195	0.012	0.0296		0.0194	0.0198	0.01185	0.03	0.01815		0.0101	0.0102	0.0063	0.0148		0.0101	0.0102	0.0062	0.0149		0.0101	0.0102	0.00625	0.01485	0.0086		0.0204	0.0207	0.0126	0.0307		0.0216	0.0221	0.0141	0.033		0.021	0.0214	0.01335	0.03185
268		t_n613		0.0029	0.0031	0.0015	0.0057		0.0029	0.003	0.0015	0.0053		0.0029	0.00305	0.0015	0.0055	0.004		0.0032	0.0033	0.0015	0.0058		0.003	0.0031	0.0013	0.0056		0.0031	0.0032	0.0014	0.0057	0.0043		0.0032	0.0034	0.0016	0.006		0.0034	0.0035	0.0016	0.0065		0.0033	0.00345	0.0016	0.00625
269		t_n614		0.0597	0.0601	0.0493	0.074		0.0575	0.058	0.0485	0.0709		0.0586	0.05905	0.0489	0.07245	0.02355		0.0296	0.0297	0.0249	0.0346		0.0298	0.0299	0.025	0.0347		0.0297	0.0298	0.02495	0.03465	0.0097		0.0606	0.0605	0.047	0.0727		0.0631	0.0639	0.0533	0.0776		0.06185	0.0622	0.05015	0.07515
270		t_n615		0.0263	0.0266	0.0202	0.0347		0.0256	0.0258	0.0199	0.0336		0.02595	0.0262	0.02005	0.03415	0.0141		0.0182	0.0183	0.0143	0.023		0.0184	0.0184	0.0144	0.023		0.0183	0.01835	0.01435	0.023	0.00865		0.0273	0.0275	0.021	0.0346		0.0286	0.0288	0.022	0.0371		0.02795	0.02815	0.0215	0.03585
271		t_n616		0.0111	0.0113	0.0046	0.0199		0.0104	0.0109	0.0045	0.0199		0.01075	0.0111	0.00455	0.0199	0.01535		0.0079	0.0083	0.0029	0.0164		0.0084	0.0086	0.0031	0.0156		0.00815	0.00845	0.003	0.016	0.013		0.0108	0.0114	0.0038	0.0218		0.0114	0.0119	0.0045	0.0226		0.0111	0.01165	0.00415	0.0222
272		t_n617		0.0243	0.0245	0.0183	0.0322		0.0235	0.0238	0.0179	0.0313		0.0239	0.02415	0.0181	0.03175	0.01365		0.0167	0.0167	0.0122	0.0215		0.0168	0.0168	0.0125	0.0216		0.01675	0.01675	0.01235	0.02155	0.0092		0.0251	0.0252	0.0189	0.0323		0.0262	0.0265	0.0195	0.0347		0.02565	0.02585	0.0192	0.0335
273		t_n618		0.0197	0.02	0.0141	0.0271		0.019	0.0193	0.0137	0.0264		0.01935	0.01965	0.0139	0.02675	0.01285		0.0137	0.0137	0.0092	0.0188		0.0138	0.0139	0.0095	0.0191		0.01375	0.0138	0.00935	0.01895	0.0096		0.0204	0.0206	0.0145	0.0276		0.0214	0.0216	0.0152	0.0292		0.0209	0.0211	0.01485	0.0284
274		t_n619		0.0118	0.0119	0.0074	0.0173		0.0114	0.0115	0.0073	0.0166		0.0116	0.0117	0.00735	0.01695	0.0096		0.008	0.0081	0.0051	0.012		0.0079	0.008	0.0046	0.012		0.00795	0.00805	0.00485	0.012	0.00715		0.0121	0.0123	0.0077	0.0179		0.0127	0.0129	0.0083	0.0182		0.0124	0.0126	0.008	0.01805
275		t_n620		0.0017	0.002	0.0004	0.0054		0.0017	0.0019	0.0003	0.0047		0.0017	0.00195	0.00035	0.00505	0.0047		0.0021	0.0027	0.0004	0.0081		0.0025	0.0029	0.0003	0.008		0.0023	0.0028	0.00035	0.00805	0.0077		0.0017	0.002	0.0003	0.0053		0.0018	0.0021	0.0004	0.0054		0.00175	0.00205	0.00035	0.00535
276		t_n621		0.0236	0.0239	0.0185	0.0307		0.0229	0.0232	0.0185	0.0301		0.02325	0.02355	0.0185	0.0304	0.0119		0.0146	0.0146	0.0115	0.018		0.0148	0.0149	0.0117	0.0183		0.0147	0.01475	0.0116	0.01815	0.00655		0.0241	0.0242	0.019	0.0301		0.0252	0.0254	0.0204	0.0317		0.02465	0.0248	0.0197	0.0309
277		t_n622		0.0155	0.0156	0.0098	0.0224		0.0148	0.015	0.0096	0.0217		0.01515	0.0153	0.0097	0.02205	0.01235		0.0098	0.0099	0.0056	0.0148		0.0101	0.0102	0.0059	0.015		0.00995	0.01005	0.00575	0.0149	0.00915		0.0155	0.0157	0.0099	0.0223		0.0158	0.0161	0.0101	0.0235		0.01565	0.0159	0.01	0.0229
278		t_n623		0.0065	0.0066	0.0036	0.0102		0.006	0.0062	0.0036	0.0102		0.00625	0.0064	0.0036	0.0102	0.0066		0.0039	0.004	0.0022	0.0063		0.0041	0.0042	0.0025	0.0063		0.004	0.0041	0.00235	0.0063	0.00395		0.0066	0.0067	0.004	0.0101		0.0068	0.007	0.0039	0.011		0.0067	0.00685	0.00395	0.01055
279		t_n624		0.0054	0.0055	0.0029	0.0088		0.0051	0.0053	0.003	0.0089		0.00525	0.0054	0.00295	0.00885	0.0059		0.0032	0.0033	0.0018	0.0054		0.0034	0.0035	0.0019	0.0053		0.0033	0.0034	0.00185	0.00535	0.0035		0.0055	0.0056	0.0032	0.0088		0.0058	0.0059	0.0031	0.0095		0.00565	0.00575	0.00315	0.00915
280		t_n625		0.0039	0.004	0.0022	0.0065		0.0039	0.004	0.0022	0.0066		0.0039	0.004	0.0022	0.00655	0.00435		0.0024	0.0025	0.0012	0.0045		0.0026	0.0026	0.0012	0.0044		0.0025	0.00255	0.0012	0.00445	0.00325		0.0041	0.0042	0.0022	0.0065		0.0043	0.0044	0.0023	0.0071		0.0042	0.0043	0.00225	0.0068
281		t_n626		0.0215	0.0218	0.0167	0.0282		0.0208	0.0211	0.0166	0.0276		0.02115	0.02145	0.01665	0.0279	0.01125		0.0125	0.0125	0.0097	0.0156		0.0127	0.0127	0.0099	0.016		0.0126	0.0126	0.0098	0.0158	0.006		0.0219	0.022	0.0169	0.0275		0.0229	0.0231	0.0184	0.029		0.0224	0.02255	0.01765	0.02825
282		t_n627		0.0076	0.0079	0.0041	0.0127		0.0074	0.0077	0.0041	0.0127		0.0075	0.0078	0.0041	0.0127	0.0086		0.0067	0.0069	0.0035	0.0113		0.0068	0.007	0.0035	0.0115		0.00675	0.00695	0.0035	0.0114	0.0079		0.0075	0.0078	0.0042	0.013		0.0082	0.0085	0.005	0.0132		0.00785	0.00815	0.0046	0.0131
283		t_n628		0.0064	0.0065	0.0029	0.0113		0.0061	0.0064	0.0028	0.0112		0.00625	0.00645	0.00285	0.01125	0.0084		0.0049	0.0052	0.0021	0.0096		0.0051	0.0053	0.0018	0.01		0.005	0.00525	0.00195	0.0098	0.00785		0.0061	0.0063	0.0024	0.0111		0.0067	0.0069	0.0033	0.0114		0.0064	0.0066	0.00285	0.01125
284		t_n629		0.0201	0.0204	0.0155	0.0266		0.0195	0.0198	0.0154	0.0261		0.0198	0.0201	0.01545	0.02635	0.0109		0.0107	0.0108	0.0077	0.0138		0.0109	0.0109	0.0078	0.0141		0.0108	0.01085	0.00775	0.01395	0.0062		0.0205	0.0206	0.016	0.0259		0.0214	0.0216	0.017	0.0274		0.02095	0.0211	0.0165	0.02665
285		t_n630		0.0148	0.015	0.0091	0.0217		0.0145	0.0147	0.0087	0.0216		0.01465	0.01485	0.0089	0.02165	0.01275		0.0067	0.0068	0.0031	0.011		0.0067	0.0067	0.0021	0.0113		0.0067	0.00675	0.0026	0.01115	0.00855		0.015	0.0151	0.0089	0.0221		0.0156	0.0158	0.0096	0.0227		0.0153	0.01545	0.00925	0.0224
286		t_n631		0.096	0.0969	0.0849	0.1144		0.0956	0.097	0.0853	0.1147		0.0958	0.09695	0.0851	0.11455	0.02945		0.0743	0.0746	0.068	0.0825		0.0745	0.0748	0.0683	0.0829		0.0744	0.0747	0.06815	0.0827	0.01455		0.1024	0.1024	0.0899	0.1145		0.107	0.1074	0.0935	0.1225		0.1047	0.1049	0.0917	0.1185
287	287	t_n632		0.0767	0.0775	0.0677	0.0919		0.0765	0.0774	0.0686	0.0912		0.0766	0.07745	0.06815	0.09155	0.0234		0.057	0.0576	0.0551	0.0631		0.0571	0.0577	0.0551	0.0635		0.05705	0.05765	0.0551	0.0633	0.0082		0.0815	0.0814	0.0714	0.0908		0.0852	0.0855	0.0746	0.0979		0.08335	0.08345	0.073	0.09435
288		t_n633		0.045	0.0454	0.0382	0.0543		0.0449	0.0455	0.0384	0.0558		0.04495	0.04545	0.0383	0.05505	0.01675		0.0329	0.0328	0.029	0.0367		0.0333	0.0332	0.0294	0.0367		0.0331	0.033	0.0292	0.0367	0.0075		0.0475	0.0474	0.0399	0.0544		0.0498	0.0501	0.0425	0.0594		0.04865	0.04875	0.0412	0.0569
289		t_n634		0.0373	0.0377	0.0319	0.0453		0.0371	0.0378	0.0322	0.0459		0.0372	0.03775	0.03205	0.0456	0.01355		0.0278	0.0279	0.0246	0.0314		0.0282	0.0282	0.0249	0.0314		0.028	0.02805	0.02475	0.0314	0.00665		0.0394	0.0393	0.0336	0.0449		0.0413	0.0416	0.0355	0.049		0.04035	0.04045	0.03455	0.04695
290		t_n635		0.0303	0.0306	0.0258	0.0368		0.0303	0.0307	0.0258	0.0378		0.0303	0.03065	0.0258	0.0373	0.0115		0.0232	0.0233	0.0202	0.0267		0.0234	0.0234	0.0203	0.0267		0.0233	0.02335	0.02025	0.0267	0.00645		0.032	0.032	0.0271	0.0369		0.0337	0.034	0.0286	0.0401		0.03285	0.033	0.02785	0.0385
291		t_n636		0.0283	0.0286	0.0238	0.0347		0.0282	0.0286	0.0237	0.0354		0.02825	0.0286	0.02375	0.03505	0.0113		0.0198	0.0199	0.0166	0.0237		0.02	0.02	0.0165	0.0236		0.0199	0.01995	0.01655	0.02365	0.0071		0.0297	0.0298	0.025	0.0346		0.0315	0.0316	0.0263	0.0379		0.0306	0.0307	0.02565	0.03625
292		t_n637		0.0216	0.0219	0.0174	0.0278		0.0217	0.022	0.0172	0.028		0.02165	0.02195	0.0173	0.0279	0.0106		0.0161	0.0161	0.0124	0.0201		0.016	0.0161	0.0124	0.02		0.01605	0.0161	0.0124	0.02005	0.00765		0.0226	0.0227	0.0182	0.0278		0.024	0.0242	0.0191	0.0303		0.0233	0.02345	0.01865	0.02905
293		t_n638		0.0176	0.0177	0.0131	0.0231		0.0175	0.0177	0.0131	0.0234		0.01755	0.0177	0.0131	0.02325	0.01015		0.0128	0.0128	0.0089	0.0171		0.0127	0.0127	0.0089	0.017		0.01275	0.01275	0.0089	0.01705	0.00815		0.0181	0.0183	0.0138	0.0233		0.0193	0.0194	0.0144	0.0252		0.0187	0.01885	0.0141	0.02425
294		t_n639		0.0055	0.0056	0.003	0.0091		0.0055	0.0056	0.0028	0.0093		0.0055	0.0056	0.0029	0.0092	0.0063		0.0059	0.0059	0.0028	0.0097		0.0057	0.0058	0.0028	0.0095		0.0058	0.00585	0.0028	0.0096	0.0068		0.0059	0.006	0.0029	0.0096		0.0061	0.0063	0.0032	0.0102		0.006	0.00615	0.00305	0.0099
295		t_n640		0.0079	0.0083	0.0024	0.016		0.0089	0.0091	0.0034	0.016		0.0084	0.0087	0.0029	0.016	0.0131		0.0088	0.009	0.0035	0.0154		0.009	0.0091	0.0034	0.0154		0.0089	0.00905	0.00345	0.0154	0.01195		0.0089	0.0091	0.0035	0.0158		0.0095	0.0099	0.0035	0.0181		0.0092	0.0095	0.0035	0.01695
296		t_n641		0.0262	0.0265	0.0219	0.0323		0.0262	0.0266	0.0221	0.0331		0.0262	0.02655	0.022	0.0327	0.0107		0.0201	0.0202	0.017	0.0237		0.0203	0.0203	0.017	0.0237		0.0202	0.02025	0.017	0.0237	0.0067		0.0277	0.0277	0.0232	0.0325		0.0293	0.0295	0.0245	0.0352		0.0285	0.0286	0.02385	0.03385
297		t_n642		0.0175	0.0177	0.014	0.0222		0.0176	0.0178	0.0142	0.0227		0.01755	0.01775	0.0141	0.02245	0.00835		0.0131	0.0132	0.01	0.0166		0.0131	0.0132	0.01	0.0168		0.0131	0.0132	0.01	0.0167	0.0067		0.0185	0.0185	0.0148	0.0225		0.0197	0.0198	0.0157	0.0244		0.0191	0.01915	0.01525	0.02345
298		t_n643		0.0164	0.0166	0.013	0.021		0.0165	0.0167	0.013	0.0212		0.01645	0.01665	0.013	0.0211	0.0081		0.0121	0.0122	0.009	0.0155		0.0121	0.0121	0.009	0.0156		0.0121	0.01215	0.009	0.01555	0.00655		0.0172	0.0172	0.0136	0.021		0.0183	0.0184	0.0144	0.0229		0.01775	0.0178	0.014	0.02195
299		t_n644		0.0287	0.0289	0.0238	0.0351		0.0286	0.0291	0.024	0.0366		0.02865	0.029	0.0239	0.03585	0.01195		0.0209	0.0209	0.0177	0.0243		0.0212	0.0212	0.0181	0.0245		0.02105	0.02105	0.0179	0.0244	0.0065		0.0301	0.03	0.0246	0.035		0.0316	0.0318	0.0263	0.0386		0.03085	0.0309	0.02545	0.0368
300		t_n645		0.0209	0.021	0.017	0.0254		0.0208	0.0212	0.0172	0.027		0.02085	0.0211	0.0171	0.0262	0.0091		0.0158	0.0158	0.0126	0.0193		0.0161	0.0161	0.0129	0.0196		0.01595	0.01595	0.01275	0.01945	0.0067		0.0218	0.0218	0.0173	0.026		0.0229	0.0231	0.0188	0.0286		0.02235	0.02245	0.01805	0.0273
301		t_n646		0.0205	0.0206	0.0166	0.0249		0.0204	0.0208	0.0169	0.0265		0.02045	0.0207	0.01675	0.0257	0.00895		0.0123	0.0123	0.009	0.0159		0.0125	0.0125	0.0091	0.0161		0.0124	0.0124	0.00905	0.016	0.00695		0.0214	0.0213	0.017	0.0255		0.0225	0.0227	0.0183	0.0281		0.02195	0.022	0.01765	0.0268
302		t_n647		0.0164	0.0165	0.0126	0.0211		0.0165	0.0167	0.0127	0.022		0.01645	0.0166	0.01265	0.02155	0.0089		0.012	0.012	0.0079	0.0163		0.0124	0.0124	0.0082	0.0166		0.0122	0.0122	0.00805	0.01645	0.0084		0.0171	0.0172	0.0129	0.0217		0.018	0.0182	0.0137	0.0237		0.01755	0.0177	0.0133	0.0227
303		t_n648		0.0086	0.0087	0.0043	0.0139		0.0088	0.0089	0.0044	0.014		0.0087	0.0088	0.00435	0.01395	0.0096		0.0058	0.006	0.0019	0.011		0.0059	0.006	0.0019	0.0111		0.00585	0.006	0.0019	0.01105	0.00915		0.0086	0.0088	0.004	0.0147		0.0096	0.0097	0.0048	0.0156		0.0091	0.00925	0.0044	0.01515
304		t_n649		0.0185	0.0187	0.0152	0.0232		0.0186	0.0189	0.0153	0.0241		0.01855	0.0188	0.01525	0.02365	0.0084		0.0124	0.0125	0.0102	0.0151		0.0125	0.0126	0.0103	0.0152		0.01245	0.01255	0.01025	0.01515	0.0049		0.0195	0.0194	0.0161	0.0229		0.0205	0.0206	0.0166	0.0251		0.02	0.02	0.01635	0.024
305		t_n650		0.0156	0.0158	0.0123	0.0201		0.0157	0.0159	0.0124	0.021		0.01565	0.01585	0.01235	0.02055	0.0082		0.0106	0.0107	0.0083	0.0134		0.0108	0.0108	0.0083	0.0136		0.0107	0.01075	0.0083	0.0135	0.0052		0.0163	0.0163	0.0129	0.0199		0.0172	0.0174	0.0136	0.0218		0.01675	0.01685	0.01325	0.02085
306		t_n651		0.0087	0.0087	0.0042	0.0139		0.0086	0.0087	0.0044	0.0137		0.00865	0.0087	0.0043	0.0138	0.0095		0.006	0.006	0.0023	0.0101		0.0058	0.0059	0.0021	0.0103		0.0059	0.00595	0.0022	0.0102	0.008		0.0089	0.0089	0.0041	0.0135		0.0093	0.0094	0.0045	0.0145		0.0091	0.00915	0.0043	0.014
307		t_n652		0.0178	0.018	0.0146	0.0224		0.0179	0.0182	0.0146	0.0233		0.01785	0.0181	0.0146	0.02285	0.00825		0.012	0.012	0.0097	0.0146		0.0121	0.0121	0.0098	0.0146		0.01205	0.01205	0.00975	0.0146	0.00485		0.0188	0.0187	0.0153	0.0222		0.0198	0.0199	0.0159	0.0243		0.0193	0.0193	0.0156	0.02325
308		t_n653		0.0169	0.017	0.0135	0.0212		0.0169	0.0172	0.0136	0.0221		0.0169	0.0171	0.01355	0.02165	0.0081		0.011	0.0111	0.0088	0.0137		0.0111	0.0112	0.0089	0.0137		0.01105	0.01115	0.00885	0.0137	0.00485		0.0177	0.0177	0.0141	0.0214		0.0187	0.0188	0.0148	0.0232		0.0182	0.01825	0.01445	0.0223
309		t_n654		0.014	0.0142	0.0108	0.0182		0.0141	0.0143	0.0108	0.0192		0.01405	0.01425	0.0108	0.0187	0.0079		0.0096	0.0096	0.0073	0.0123		0.0097	0.0097	0.0074	0.0123		0.00965	0.00965	0.00735	0.0123	0.00495		0.0147	0.0147	0.0113	0.0185		0.0156	0.0157	0.012	0.0199		0.01515	0.0152	0.01165	0.0192
310		t_n655		0.0662	0.0669	0.0578	0.0794		0.0661	0.0669	0.0581	0.0797		0.06615	0.0669	0.05795	0.07955	0.0216		0.0491	0.0493	0.045	0.0545		0.0493	0.0495	0.0452	0.0546		0.0492	0.0494	0.0451	0.05455	0.00945		0.0702	0.0701	0.0606	0.0788		0.0734	0.0738	0.0634	0.0858		0.0718	0.07195	0.062	0.0823
311	311	t_n656		0.0386	0.0391	0.0352	0.0464		0.0384	0.0388	0.0353	0.0447		0.0385	0.03895	0.03525	0.04555	0.0103		0.0353	0.0354	0.035	0.0365		0.0353	0.0355	0.035	0.0366		0.0353	0.03545	0.035	0.03655	0.00155		0.0408	0.0408	0.0355	0.0462		0.0426	0.0427	0.0365	0.0496		0.0417	0.04175	0.036	0.0479
312		t_n657		0.032	0.0323	0.0269	0.0394		0.032	0.0321	0.0269	0.0385		0.032	0.0322	0.0269	0.03895	0.01205		0.0274	0.0273	0.0228	0.0315		0.0276	0.0275	0.0231	0.0316		0.0275	0.0274	0.02295	0.03155	0.0086		0.0338	0.0339	0.0282	0.0398		0.0351	0.0353	0.0287	0.0425		0.03445	0.0346	0.02845	0.04115
313		t_n658		0.0171	0.0173	0.0128	0.0231		0.017	0.0171	0.0123	0.0222		0.01705	0.0172	0.01255	0.02265	0.0101		0.0163	0.0165	0.0104	0.024		0.0164	0.0167	0.0108	0.0239		0.01635	0.0166	0.0106	0.02395	0.01335		0.018	0.0181	0.0134	0.0232		0.0187	0.0189	0.0137	0.0251		0.01835	0.0185	0.01355	0.02415
314		t_n659		0.0122	0.0123	0.0094	0.0158		0.0121	0.0121	0.0094	0.0152		0.01215	0.0122	0.0094	0.0155	0.0061		0.0092	0.0093	0.0067	0.0122		0.0094	0.0095	0.0068	0.0125		0.0093	0.0094	0.00675	0.01235	0.0056		0.0128	0.0129	0.0101	0.016		0.0133	0.0135	0.0103	0.0172		0.01305	0.0132	0.0102	0.0166
315		t_n660		0.0114	0.0115	0.0087	0.0148		0.0113	0.0113	0.0087	0.0143		0.01135	0.0114	0.0087	0.01455	0.00585		0.0084	0.0084	0.0059	0.0113		0.0086	0.0086	0.0062	0.0115		0.0085	0.0085	0.00605	0.0114	0.00535		0.012	0.012	0.0094	0.015		0.0125	0.0126	0.0095	0.0162		0.01225	0.0123	0.00945	0.0156
316		t_n661		0.0105	0.0106	0.0079	0.0138		0.0104	0.0105	0.0078	0.0134		0.01045	0.01055	0.00785	0.0136	0.00575		0.0075	0.0076	0.0049	0.0105		0.0078	0.0078	0.0052	0.0108		0.00765	0.0077	0.00505	0.01065	0.0056		0.0111	0.0111	0.0085	0.0141		0.0115	0.0116	0.0086	0.0152		0.0113	0.01135	0.00855	0.01465
317		t_n662		0.0073	0.0074	0.0047	0.0104		0.0072	0.0072	0.0046	0.0103		0.00725	0.0073	0.00465	0.01035	0.0057		0.0049	0.005	0.0025	0.0079		0.0053	0.0053	0.0028	0.0083		0.0051	0.00515	0.00265	0.0081	0.00545		0.0076	0.0076	0.0051	0.0106		0.0079	0.008	0.0051	0.0115		0.00775	0.0078	0.0051	0.01105
318		t_n663		0.0032	0.0033	0.0008	0.0069		0.0031	0.0032	0.0009	0.0065		0.00315	0.00325	0.00085	0.0067	0.00585		0.0021	0.0022	0.0006	0.0041		0.0021	0.0022	0.0006	0.0044		0.0021	0.0022	0.0006	0.00425	0.00365		0.0033	0.0035	0.0007	0.0068		0.0032	0.0034	0.0005	0.0069		0.00325	0.00345	0.0006	0.00685
319		t_n664		0.0448	0.0451	0.037	0.0547		0.0448	0.0451	0.0373	0.0547		0.0448	0.0451	0.03715	0.0547	0.01755		0.0333	0.0332	0.0283	0.0385		0.0334	0.0333	0.0284	0.0387		0.03335	0.03325	0.02835	0.0386	0.01025		0.0481	0.0482	0.0405	0.0564		0.0501	0.0503	0.0414	0.0598		0.0491	0.04925	0.04095	0.0581
320		t_n665		0.0109	0.0113	0.0065	0.018		0.0113	0.0116	0.0068	0.0179		0.0111	0.01145	0.00665	0.01795	0.0113		0.0087	0.0088	0.0055	0.0128		0.0086	0.0087	0.0051	0.0128		0.00865	0.00875	0.0053	0.0128	0.0075		0.0109	0.0112	0.0066	0.0172		0.0121	0.0124	0.0071	0.0189		0.0115	0.0118	0.00685	0.01805
321		t_n666		0.0345	0.0346	0.0273	0.0425		0.0343	0.0344	0.0265	0.0432		0.0344	0.0345	0.0269	0.04285	0.01595		0.0259	0.0259	0.0207	0.0314		0.0262	0.0262	0.0208	0.0317		0.02605	0.02605	0.02075	0.03155	0.0108		0.0363	0.0362	0.0281	0.0442		0.0381	0.0383	0.0304	0.047		0.0372	0.03725	0.02925	0.0456
322		t_n667		0.0067	0.0102	0.0006	0.0309		0.009	0.0112	0.0003	0.0316		0.00785	0.0107	0.00045	0.03125	0.0308		0.0082	0.0097	0.0005	0.0239		0.0107	0.0113	0.0017	0.0239		0.00945	0.0105	0.0011	0.0239	0.0228		0.006	0.0087	0.0003	0.0301		0.0083	0.0113	0.0006	0.0327		0.00715	0.01	0.00045	0.0314
323		t_n668		0.0037	0.0039	0.0005	0.0083		0.0039	0.004	0.0007	0.0088		0.0038	0.00395	0.0006	0.00855	0.00795		0.0028	0.0029	0.0005	0.0057		0.0026	0.0027	0.0006	0.0056		0.0027	0.0028	0.00055	0.00565	0.0051		0.0044	0.0047	0.001	0.0099		0.0046	0.0048	0.0014	0.0096		0.0045	0.00475	0.0012	0.00975
324		t_n669		0.0014	0.0017	0	0.005		0.0021	0.0023	0.0001	0.0055		0.00175	0.002	5e-05	0.00525	0.0052		0.0015	0.0017	0.0001	0.0041		0.0012	0.0014	0	0.0037		0.00135	0.00155	5e-05	0.0039	0.00385		0.0023	0.0025	0.0004	0.0059		0.0025	0.0026	0.0003	0.0058		0.0024	0.00255	0.00035	0.00585
325		t_n670		0.0736	0.0742	0.0641	0.0879		0.0736	0.0744	0.0649	0.0874		0.0736	0.0743	0.0645	0.08765	0.02315		0.0502	0.0504	0.0446	0.0569		0.0505	0.0507	0.0449	0.0576		0.05035	0.05055	0.04475	0.05725	0.0125		0.0785	0.0784	0.0683	0.0885		0.0818	0.0821	0.0707	0.0938		0.08015	0.08025	0.0695	0.09115
326		t_n671		0.0677	0.0684	0.0588	0.0816		0.0678	0.0686	0.0595	0.0813		0.06775	0.0685	0.05915	0.08145	0.0223		0.0457	0.0457	0.0406	0.0516		0.0457	0.0459	0.0409	0.0521		0.0457	0.0458	0.04075	0.05185	0.0111		0.0722	0.0723	0.0623	0.0822		0.0755	0.0757	0.065	0.0871		0.07385	0.074	0.06365	0.08465
327		t_n672		0.0602	0.0607	0.0513	0.0731		0.0605	0.0611	0.0522	0.0732		0.06035	0.0609	0.05175	0.07315	0.0214		0.0345	0.0346	0.0309	0.039		0.0346	0.0347	0.0309	0.0395		0.03455	0.03465	0.0309	0.03925	0.00835		0.0641	0.0642	0.0544	0.0748		0.067	0.0672	0.057	0.0787		0.06555	0.0657	0.0557	0.07675
328		t_n673		0.0567	0.057	0.0477	0.0694		0.0569	0.0575	0.0486	0.0695		0.0568	0.05725	0.04815	0.06945	0.0213		0.0328	0.0327	0.0289	0.0363		0.033	0.0328	0.0289	0.0364		0.0329	0.03275	0.0289	0.03635	0.00745		0.0603	0.0604	0.0508	0.0708		0.0629	0.0632	0.0534	0.0745		0.0616	0.0618	0.0521	0.07265
329		t_n674		0.0523	0.0526	0.0435	0.0646		0.0525	0.053	0.0441	0.0649		0.0524	0.0528	0.0438	0.06475	0.02095		0.0299	0.0299	0.0257	0.0339		0.03	0.03	0.0257	0.0341		0.02995	0.02995	0.0257	0.034	0.0083		0.0555	0.0556	0.0461	0.0658		0.0578	0.0582	0.0482	0.0691		0.05665	0.0569	0.04715	0.06745
330		t_n675		0.0388	0.0395	0.0324	0.0504		0.0389	0.0397	0.0327	0.051		0.03885	0.0396	0.03255	0.0507	0.01815		0.0225	0.0225	0.0184	0.0267		0.0226	0.0226	0.0185	0.027		0.02255	0.02255	0.01845	0.02685	0.0084		0.0413	0.0418	0.0344	0.0518		0.043	0.0435	0.0356	0.0541		0.04215	0.04265	0.035	0.05295
331		t_n676		0.0348	0.0351	0.0277	0.0454		0.035	0.0354	0.0279	0.0458		0.0349	0.03525	0.0278	0.0456	0.0178		0.0192	0.0193	0.0146	0.0242		0.0193	0.0194	0.0145	0.0241		0.01925	0.01935	0.01455	0.02415	0.0096		0.0369	0.0372	0.0294	0.0471		0.0385	0.0388	0.0306	0.0493		0.0377	0.038	0.03	0.0482
332		t_n677		0.0196	0.0199	0.0141	0.0277		0.0196	0.0198	0.0139	0.0273		0.0196	0.01985	0.014	0.0275	0.0135		0.0127	0.0127	0.0091	0.0168		0.0128	0.0129	0.0091	0.0169		0.01275	0.0128	0.0091	0.01685	0.00775		0.0206	0.0209	0.0149	0.028		0.022	0.0222	0.0151	0.0302		0.0213	0.02155	0.015	0.0291
333		t_n678		0.0154	0.0155	0.0084	0.0238		0.0157	0.0156	0.0083	0.0231		0.01555	0.01555	0.00835	0.02345	0.0151		0.009	0.0089	0.0027	0.0144		0.0096	0.0095	0.0043	0.0148		0.0093	0.0092	0.0035	0.0146	0.0111		0.0164	0.0165	0.0087	0.0244		0.017	0.017	0.0084	0.0263		0.0167	0.01675	0.00855	0.02535
334		t_n679		0.0033	0.004	0.0002	0.0121		0.0035	0.0042	0.0001	0.0126		0.0034	0.0041	0.00015	0.01235	0.0122		0.0026	0.0033	0	0.0104		0.0047	0.0049	0.0005	0.0108		0.00365	0.0041	0.00025	0.0106	0.01035		0.0048	0.0055	0.001	0.0137		0.0036	0.0044	0.0002	0.0137		0.0042	0.00495	0.0006	0.0137
335		t_n680		0.025	0.0253	0.0148	0.0368		0.0251	0.0253	0.0151	0.0368		0.02505	0.0253	0.01495	0.0368	0.02185		0.0168	0.0168	0.0106	0.0232		0.0171	0.0171	0.0107	0.0233		0.01695	0.01695	0.01065	0.02325	0.0126		0.0265	0.0268	0.0163	0.0389		0.0281	0.0283	0.0169	0.041		0.0273	0.02755	0.0166	0.03995
336		t_n681		0.0073	0.0075	0.003	0.0135		0.0073	0.0074	0.0021	0.0132		0.0073	0.00745	0.00255	0.01335	0.0108		0.0042	0.0043	0.0012	0.0079		0.0043	0.0044	0.0013	0.0082		0.00425	0.00435	0.00125	0.00805	0.0068		0.0083	0.0086	0.0037	0.0149		0.008	0.0082	0.0027	0.0147		0.00815	0.0084	0.0032	0.0148
337		t_n682		0.0544	0.0547	0.0447	0.0669		0.0547	0.0552	0.046	0.067		0.05455	0.05495	0.04535	0.06695	0.0216		0.0307	0.0306	0.0259	0.0346		0.0308	0.0307	0.0259	0.0346		0.03075	0.03065	0.0259	0.0346	0.0087		0.058	0.0581	0.0479	0.0687		0.0604	0.0606	0.0498	0.0719		0.0592	0.05935	0.04885	0.0703
338		t_n683		0.0226	0.0229	0.0144	0.0332		0.0226	0.0228	0.0149	0.0325		0.0226	0.02285	0.01465	0.03285	0.0182		0.0166	0.0166	0.0111	0.0227		0.0167	0.0167	0.0114	0.0226		0.01665	0.01665	0.01125	0.02265	0.0114		0.0243	0.0245	0.0158	0.0345		0.0251	0.0253	0.0159	0.036		0.0247	0.0249	0.01585	0.03525
339		t_n684		0.0126	0.013	0.0009	0.0279		0.0134	0.0134	0.0011	0.0263		0.013	0.0132	0.001	0.0271	0.0261		0.0044	0.0057	0.0004	0.0162		0.0036	0.0049	0	0.0159		0.004	0.0053	0.0002	0.01605	0.01585		0.0151	0.015	0.0013	0.0293		0.0138	0.0139	0.0015	0.03		0.01445	0.01445	0.0014	0.02965
340		t_n685		0.0557	0.0562	0.0472	0.0683		0.0559	0.0564	0.0476	0.068		0.0558	0.0563	0.0474	0.06815	0.02075		0.0332	0.0331	0.0289	0.0368		0.0334	0.0332	0.0291	0.037		0.0333	0.03315	0.029	0.0369	0.0079		0.0591	0.0591	0.0499	0.0685		0.0617	0.0619	0.0522	0.0726		0.0604	0.0605	0.05105	0.07055
341		t_n686		0.0477	0.0473	0.0326	0.0626		0.048	0.0476	0.0322	0.0625		0.04785	0.04745	0.0324	0.06255	0.03015		0.0275	0.0272	0.0181	0.0341		0.0277	0.0272	0.0181	0.0341		0.0276	0.0272	0.0181	0.0341	0.016		0.0504	0.0496	0.0346	0.0632		0.053	0.0523	0.0347	0.0673		0.0517	0.05095	0.03465	0.06525
342		t_n687		0.021	0.0212	0.0168	0.0272		0.0211	0.0213	0.017	0.027		0.02105	0.02125	0.0169	0.0271	0.0102		0.0114	0.0115	0.0085	0.0147		0.0115	0.0115	0.0089	0.0147		0.01145	0.0115	0.0087	0.0147	0.006		0.0219	0.022	0.0175	0.0271		0.023	0.0231	0.0184	0.029		0.02245	0.02255	0.01795	0.02805
343		t_n688		0.02	0.0202	0.0161	0.0254		0.02	0.0202	0.0162	0.0252		0.02	0.0202	0.01615	0.0253	0.00915		0.0109	0.011	0.0082	0.0141		0.011	0.011	0.0085	0.014		0.01095	0.011	0.00835	0.01405	0.0057		0.0209	0.021	0.0168	0.0256		0.0219	0.022	0.0175	0.0271		0.0214	0.0215	0.01715	0.02635
344		t_n689		0.0116	0.0117	0.0088	0.0154		0.0117	0.0118	0.0089	0.0155		0.01165	0.01175	0.00885	0.01545	0.0066		0.0085	0.0085	0.0058	0.0116		0.0085	0.0085	0.006	0.0115		0.0085	0.0085	0.0059	0.01155	0.00565		0.0121	0.0123	0.0092	0.0159		0.0128	0.0129	0.0096	0.0167		0.01245	0.0126	0.0094	0.0163
345		t_n690		0.0093	0.0094	0.0069	0.0126		0.0093	0.0094	0.007	0.0126		0.0093	0.0094	0.00695	0.0126	0.00565		0.0069	0.007	0.0043	0.01		0.007	0.007	0.0044	0.01		0.00695	0.007	0.00435	0.01	0.00565		0.0097	0.0098	0.0071	0.0129		0.0102	0.0103	0.0075	0.0136		0.00995	0.01005	0.0073	0.01325
346		t_n691		0.0515	0.0519	0.043	0.0638		0.0516	0.0521	0.0428	0.0638		0.05155	0.052	0.0429	0.0638	0.0209		0.031	0.0309	0.0264	0.0347		0.0312	0.0311	0.0266	0.0349		0.0311	0.031	0.0265	0.0348	0.0083		0.0545	0.0545	0.0457	0.064		0.0569	0.0571	0.0474	0.0683		0.0557	0.0558	0.04655	0.06615
347		t_n692		0.0368	0.0375	0.025	0.0522		0.037	0.0377	0.0262	0.052		0.0369	0.0376	0.0256	0.0521	0.0265		0.0173	0.0174	0.0087	0.0271		0.0171	0.0172	0.0082	0.0266		0.0172	0.0173	0.00845	0.02685	0.0184		0.039	0.0397	0.0268	0.0547		0.0406	0.0413	0.0272	0.0579		0.0398	0.0405	0.027	0.0563
348		t_n693		0.0133	0.0135	0.0022	0.026		0.0131	0.0136	0.0048	0.0257		0.0132	0.01355	0.0035	0.02585	0.02235		0.0091	0.0094	0.0015	0.0187		0.0088	0.0091	0.0019	0.0181		0.00895	0.00925	0.0017	0.0184	0.0167		0.015	0.0155	0.0058	0.0277		0.0141	0.0146	0.0025	0.0298		0.01455	0.01505	0.00415	0.02875
349		t_n694		0.0704	0.0709	0.0598	0.0847		0.0704	0.0709	0.0601	0.0846		0.0704	0.0709	0.05995	0.08465	0.0247		0.0476	0.0478	0.0408	0.0555		0.0479	0.0481	0.0411	0.0563		0.04775	0.04795	0.04095	0.0559	0.01495		0.0752	0.0751	0.0637	0.0858		0.0783	0.0784	0.0662	0.0912		0.07675	0.07675	0.06495	0.0885
350		t_n695		0.0348	0.0362	0.0167	0.0629		0.0338	0.0345	0.0131	0.0604		0.0343	0.03535	0.0149	0.06165	0.04675		0.0263	0.0258	0.0095	0.0422		0.026	0.0254	0.0052	0.0441		0.02615	0.0256	0.00735	0.04315	0.0358		0.0354	0.0363	0.0175	0.0623		0.0375	0.0396	0.0178	0.0717		0.03645	0.03795	0.01765	0.067
351		t_n696		0.7396	0.7404	0.7154	0.7767		0.7405	0.74	0.7162	0.7605		0.74005	0.7402	0.7158	0.7686	0.0528		0.8544	0.8552	0.7739	0.9425		0.852	0.8531	0.768	0.9381		0.8532	0.85415	0.77095	0.9403	0.16935		0.7255	0.7279	0.6886	0.7789		0.7287	0.7313	0.6928	0.7841		0.7271	0.7296	0.6907	0.7815
352		t_n697		0.0766	0.093	0.035	0.2008		0.0775	0.0924	0.0346	0.2059		0.07705	0.0927	0.0348	0.20335	0.16855		0.126	0.1248	0.094	0.155		0.1263	0.1253	0.0951	0.1562		0.12615	0.12505	0.09455	0.1556	0.06105		0.0772	0.0857	0.0392	0.1765		0.078	0.0844	0.038	0.1798		0.0776	0.08505	0.0386	0.17815
[truncated: 17 more columns]
